# Supplementary material for: Copper(ii)-catalyzed direct dehydrative alkynylation of 2H-chromene hemiketals with terminal alkynes to 2,2-disubstituted 2-alkynylated 2H-chromenes
Source: Royal Society of Chemistry journal article supplement (doi:10.1039/d2ob00481j), 2022-01-01
Supplement: d2ob00481j1.pdf [file d2ob00481j1.pdf]

# Copper(II)-catalyzed Alkynylation of 2*H*-Chromene Hemiketals with Terminal Alkynes to 2,2-Disubstituted 2-Alkynylated 2*H*-Chromenes

Shi-Lu Zheng,<sup>a,c</sup> Zhong Wen,<sup>b,c</sup> Kai-Cheng Yang,<sup>b,c</sup> Yao Zeng,<sup>b,c</sup> Long Chen\*<sup>b,c</sup> and Jun-Feng Deng\*<sup>b,c</sup>

<sup>a</sup> College of Food and Biological Engineering, Chengdu University, 2025 Chengluo Avenue, Chengdu 610016, P. R. China;

<sup>b</sup> Antibiotics Research and Re-evaluation Key Laboratory of Sichuan Province, Sichuan Industrial Institute of Antibiotics, School of Pharmacy, Chengdu University, 2025 Chengluo Avenue, Chengdu 610016, P. R. China

<sup>c</sup> Institute for Advanced Study, Chengdu University, 2025 Chengluo Avenue, Chengdu 610016, P. R. China; E-mail: [chenlong@cdu.edu.cn](mailto:chenlong@cdu.edu.cn).

| <b>Table of Contents</b>                                                                                | <b>Page</b>  |
|---------------------------------------------------------------------------------------------------------|--------------|
| <b>1. General information</b>                                                                           | <b>2</b>     |
| <b>2. Condition optimization</b>                                                                        | <b>3</b>     |
| <b>2. General procedure for the alkynylation of 2<i>H</i>-chromene hemiketals with terminal alkynes</b> | <b>4-14</b>  |
| <b>3. Gram-scale synthesis and product elaboration</b>                                                  | <b>14-15</b> |
| <b>4. <sup>1</sup>H, <sup>13</sup>C and <sup>19</sup>F NMR spectra</b>                                  | <b>16-93</b> |

## 1. General information:

Reactions were monitored by thin layer chromatography using UV light to visualize the reaction course. Purification of reaction products were carried out by flash chromatography on silica gel H. Chemical yields refer to pure isolated substances.  $^1\text{H}$  and  $^{13}\text{C}$  NMR spectra were obtained using a Bruker DPX-600 or DPX-400 spectrometer. The  $^{19}\text{F}$  NMR spectra was recorded at JEOL 565 MHz. HRMS data were collected on a on a Thermo Scientific LTQ Orbitrap Discovery (Bremen, Germany). The linear ion trap (LTQ) part of the hybrid MS system was equipped with electrospray ionization (ESI) probe and operated in both positive and negative ion modes. Chemical shifts are reported in ppm from tetramethylsilane with the solvent resonance as the internal standard. The following abbreviations were used to designate chemical shift multiplicities: s = singlet, d = doublet, t = triplet, q = quartet, h = heptet, m = multiplet, br = broad.

All reactions were run under an atmosphere of air. Anhydrous THF, toluene and 1,4-dioxane were prepared by distillation over sodium-benzophenone ketyl prior to use. Anhydrous acetone was distilled over anhydrous  $\text{CaSO}_4$  and stored over MS 4Å. Anhydrous halogenated solvents and  $\text{CH}_3\text{CN}$  were prepared by first distillation over  $\text{P}_2\text{O}_5$  and then from  $\text{CaH}_2$ . Anhydrous ethyl acetate was prepared by first dried in anhydrous  $\text{Na}_2\text{SO}_4$  and then distilled over  $\text{P}_2\text{O}_5$  and stored over MS 4Å. Anhydrous  $\text{CH}_3\text{NO}_2$  was prepared by first dried in anhydrous  $\text{Na}_2\text{SO}_4$  and then distilled under reduced pressure. 2*H*-chromene hemiacetals **1** were prepared according to the literature report.<sup>1</sup>  $\text{CuCl}_2$  (99.999%) was purchased from Sigma-Aldrich and used as received.

---

1 a) Y.-C. Wu, H.-J. Li, L. Liu, N. Demoulin, Z. Liu, D. Wang and Y.-J. Chen, *Adv. Synth. Catal.*, 2011, **353**, 907; b) Y.-C. Wu, L. Liu, Y.-L. Liu, D. Wang and Y.-J. Chen, *J. Org. Chem.* 2007, **72**, 9383; c) M. Terada, T. Yamanaka and Y. Toda, *Chemical Engineering Journal.*, 2013, **19**, 13658.

## 2. Condition optimization

### 2.1 Solvent screening

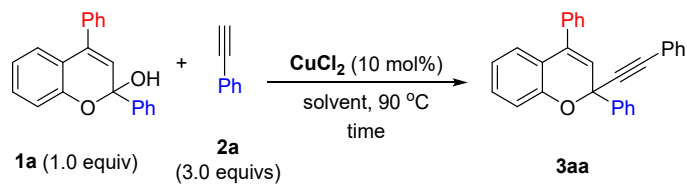

| Entry     | Solvent                           | Time (h)   | Yield (%) |
|-----------|-----------------------------------|------------|-----------|
| 1         | DCE                               | 3          | 82        |
| 2         | DCM                               | 6          | 73        |
| 3         | 1,1,2-Trichloroethane             | 4          | 78        |
| 4         | Toluene                           | 4          | 53        |
| 5         | $\text{CH}_3\text{CN}$            | 7          | 47        |
| 6         | $\text{CH}_3\text{NO}_2$          | 10         | 40        |
| 7         | DMF                               | 10         | 30        |
| 8         | $\text{CH}_3\text{CO}_2\text{Et}$ | 4          | 70        |
| 9         | THF                               | 4          | 72        |
| <b>10</b> | <b>1,4-Dioxane</b>                | <b>1.5</b> | <b>83</b> |
| 11        | DME                               | 3          | 76        |
| 12        | $\text{}^n\text{Bu}_2\text{O}$    | 24         | 21        |
| 13        | 18-Crown-6                        | 6          | 61        |
| 14        | Tetrahydropyran                   | 4          | 68        |

### 2.2 Temperature, catalyst loading and the amount of ethynylbenzene screening

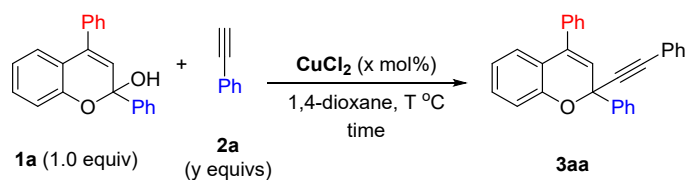

| Entry | x         | y          | Temperature (°C) | Time (h)   | Yield (%) |
|-------|-----------|------------|------------------|------------|-----------|
| 1     | <b>10</b> | <b>3.0</b> | <b>90</b>        | <b>1.5</b> | <b>83</b> |
| 2     | <b>15</b> | <b>3.0</b> | <b>90</b>        | <b>1.5</b> | <b>77</b> |
| 3     | 20        | 3.0        | 90               | 1.5        | 76        |
| 4     | <b>10</b> | <b>2.5</b> | <b>90</b>        | <b>2.0</b> | <b>83</b> |
| 5     | 10        | 2.0        | 90               | 2.0        | 76        |
| 6     | 10        | 3.0        | 60               | 27         | 25        |
| 7     | 10        | 3.0        | 100              | 1          | 79        |
| 8     | 10        | 3.0        | 120              | 0.25       | 73        |

## 2. General procedure for the alkylation of 2*H*-chromene hemiketals with terminal alkynes to 2,2-disubstituted 2-alkynylated 2*H*-chromenes

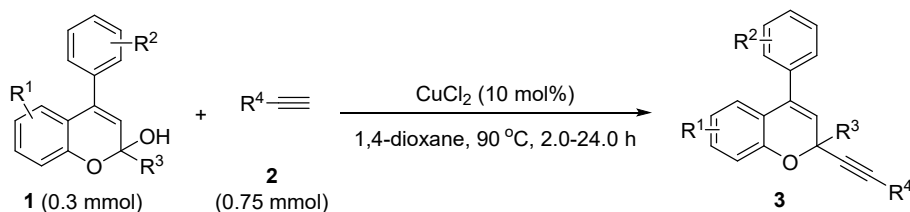

The reaction was carried out under an air atmosphere. To a 10-mL vial were added 2*H*-chromene hemiketals **1** (0.3 mmol, 1.0 equiv), alkynes **2** (0.75 mmol, 2.5 equivs) and 3.0 mL of anhydrous 1,4-dioxane. After adding CuCl<sub>2</sub> (4.0 mg, 10 mol%), the reaction mixture was stirred at 90 °C till almost full conversion of **1** by TLC analysis. The reaction mixture was directly subjected to column chromatography using petroleum ether as the eluent to afford the desired products **3**.

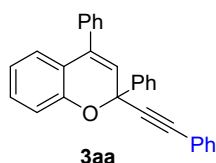

Column chromatography afforded the desired product **3aa** in 83% yield (95.7 mg) as yellow oil; <sup>1</sup>H NMR (400 MHz, CDCl<sub>3</sub>): δ = 7.88-7.86 (m, 2H), 7.46-7.35 (m, 10H), 7.29-7.24 (m, 3H), 7.23-7.19 (m, 1H), 7.12-7.09 (m, 1H), 7.04-7.02 (m, 1H), 6.90 (t, *J* = 7.6 Hz, 1H), 5.92 (s, 1H); <sup>13</sup>C {<sup>1</sup>H} NMR (100 MHz, CDCl<sub>3</sub>): δ = 152.5, 142.0, 137.6, 135.7, 131.9, 129.4, 128.8, 128.7, 128.52, 128.46, 128.4, 128.2, 128.1, 126.6, 125.9, 124.9, 122.3, 121.8, 121.5, 117.2, 88.12, 88.08, 76.1; HRMS (ESI): Exact mass calcd for C<sub>28</sub>H<sub>20</sub>O [M+H]<sup>+</sup>: 385.1587, Found: 385.1584.

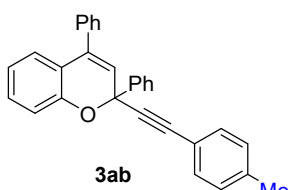

Column chromatography afforded product **3ab** in 71% yield (84.9 mg) as pale yellow oil; <sup>1</sup>H NMR (600 MHz, CDCl<sub>3</sub>): δ = 7.88 (ABd, *J* = 7.2 Hz, 2H), 7.47-7.42 (m, 7H), 7.41-7.39 (m, 1H), 7.34 (ABd, *J* = 7.8 Hz, 2H), 7.24-7.21 (m, 1H), 7.13-7.10 (m, 3H), 7.04 (d, *J* = 8.4 Hz, 1H), 6.92-6.90 (m, 1H), 5.93 (s, 1H), 2.34 (s, 3H); <sup>13</sup>C {<sup>1</sup>H} NMR (150 MHz, CDCl<sub>3</sub>): δ = 152.5, 142.1, 138.8, 137.6, 135.6, 131.8, 129.7, 129.0, 128.8, 128.5, 128.43, 128.39, 128.0, 126.6, 125.9, 125.1, 121.8, 121.4, 119.2, 117.2, 88.4, 87.5, 76.2, 21.5; HRMS (ESI): Exact mass calcd for C<sub>30</sub>H<sub>22</sub>O [M+H]<sup>+</sup>: 399.1743, Found: 399.1744.

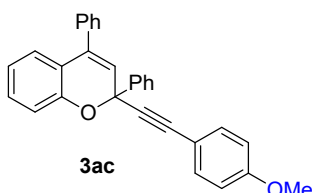

Column chromatography afforded **3ac** in 67% yield (83.3 mg) as yellow oil; <sup>1</sup>H NMR (600 MHz, CDCl<sub>3</sub>): δ = 7.87-7.86 (m, 2H), 7.47-7.45 (m, 2H), 7.44-



7.40 (m, 5H), 7.39-7.37 (m, 3H), 7.23-7.20 (m, 1H), 7.12-7.10 (m, 1H), 7.03-7.02 (m, 1H), 6.92-6.89 (m, 1H), 6.82-6.81 (m, 2H), 5.92 (s, 1H), 3.80 (s, 3H);  $^{13}\text{C}\{^1\text{H}\}$  NMR (150 MHz,  $\text{CDCl}_3$ ):  $\delta = 159.9, 152.5, 142.2, 137.7, 135.5, 133.4, 129.7, 128.9, 128.42, 128.40, 128.0, 126.6, 125.9, 125.2, 121.8, 121.4, 117.2, 114.4, 113.8, 88.2, 86.8, 76.2, 55.3$ ; HRMS (ESI): Exact mass calcd for  $\text{C}_{30}\text{H}_{22}\text{O}_2$   $[\text{M}+\text{H}]^+$ : 415.1693, Found: 415.1694.

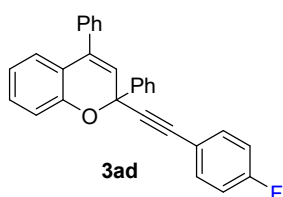

Column chromatography afforded **3ad** in 58% yield (70.0 mg) as yellow oil;  $^1\text{H}$  NMR (600 MHz,  $\text{CDCl}_3$ ):  $\delta = 7.86-7.84$  (m, 2H), 7.46-7.44 (m, 3H), 7.43-7.40 (m, 6H), 7.38-7.35 (m, 1H), 7.24-7.21 (m, 1H), 7.12 (dd,  $J = 7.8$  Hz, 1.2 Hz, 1H), 7.03 (d,  $J = 8.4$  Hz, 1H), 7.00-6.97 (m, 2H), 6.91 (t,  $J = 7.8$  Hz, 1H), 5.92

(s, 1H);  $^{13}\text{C}\{^1\text{H}\}$  NMR (150 MHz,  $\text{CDCl}_3$ ):  $\delta = 162.7$  (d,  $J_{\text{C-F}} = 249.0$  Hz), 152.4, 141.9, 137.6, 135.8, 133.9 (d,  $J_{\text{C-F}} = 7.5$  Hz), 129.8, 128.8, 128.6, 128.5, 128.4, 128.1, 126.6, 126.0, 124.8, 121.8, 121.5, 118.4, 117.2, 115.5 (d,  $J_{\text{C-F}} = 22.5$  Hz), 87.9, 87.0, 76.1;  $^{19}\text{F}\{^1\text{H}\}$  NMR (565 MHz,  $\text{CDCl}_3$ ):  $\delta = -110.1$ ; HRMS (ESI): Exact mass calcd for  $\text{C}_{29}\text{H}_{19}\text{FO}$   $[\text{M}+\text{H}]^+$ : 403.1493, Found: 403.1493.

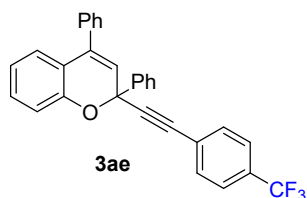

Column chromatography afforded the desired product **3ae** in 57% yield (77.4 mg) as yellow oil;  $^1\text{H}$  NMR (600 MHz,  $\text{CDCl}_3$ ):  $\delta = 7.86-7.84$  (m, 2H), 7.56-7.52 (m, 4H), 7.47-7.44 (m, 4H), 7.43-7.40 (m, 3H), 7.39-7.38 (m, 1H), 7.25-7.23 (m, 1H), 7.13 (dd,  $J = 7.8$  Hz, 1.8 Hz, 1H), 7.05 (dd,  $J = 8.4$  Hz, 1.2 Hz, 1H), 6.93 (td,  $J = 7.8$  Hz, 1.2 Hz, 1H), 5.93 (s, 1H);  $^{13}\text{C}\{^1\text{H}\}$  NMR (150 MHz,  $\text{CDCl}_3$ ):  $\delta = 152.4, 141.6, 137.5, 136.1, 132.1, 130.4$  (q,  $J_{\text{C-F}} = 33.0$  Hz), 129.9, 128.8, 128.7, 128.6, 128.5, 128.2, 126.5, 126.12, 126.07, 125.2 (q,  $J_{\text{C-F}} = 3.0$  Hz), 124.4, 121.8, 121.7, 117.2, 90.7, 86.6, 76.0;  $^{19}\text{F}\{^1\text{H}\}$  NMR (565 MHz,  $\text{CDCl}_3$ ):  $\delta = -62.8$ ; HRMS (ESI): Exact mass calcd for  $\text{C}_{30}\text{H}_{19}\text{F}_3\text{O}$   $[\text{M}+\text{H}]^+$ : 453.1461, Found: 453.1462.

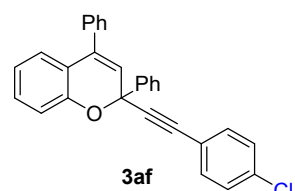

Column chromatography afforded the desired product **3af** in 75% yield (94.2 mg) as white solid; Mp: 99-101 °C;  $^1\text{H}$  NMR (600 MHz,  $\text{CDCl}_3$ ):  $\delta = 7.85$  (ABd,  $J = 7.8$  Hz, 2H), 7.46-7.36 (m, 11H), 7.274-7.272 (m, 1H), 7.24-7.21 (m, 1H), 7.12-7.11 (m, 1H), 7.04-7.03 (m, 1H), 6.93-6.90 (m, 1H), 5.92 (s, 1H);

$^{13}\text{C}\{^1\text{H}\}$  NMR (150 MHz,  $\text{CDCl}_3$ ):  $\delta = 152.4, 141.8, 137.5, 135.9, 133.1, 129.8, 128.8, 128.6, 128.5, 128.4, 128.1, 126.5, 126.0, 124.7, 121.7, 121.6, 120.8, 117.1, 89.2, 86.9, 76.1$ ; HRMS (ESI): Exact mass

calcd for C<sub>29</sub>H<sub>19</sub>ClO [M+H]<sup>+</sup>: 419.1197, Found: 419.1197.

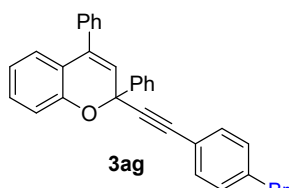

Product **3ag** was obtained in 67% yield (93.1 mg) as white solid; Mp: 42-44 °C;

<sup>1</sup>H NMR (600 MHz, CDCl<sub>3</sub>): δ = 7.86-7.84 (m, 2H), 7.46-7.42 (m, 8H), 7.41-7.39 (m, 1H), 7.38-7.37 (m, 1H), 7.30-7.28 (m, 2H), 7.24-7.22 (m, 1H), 7.12 (dd, *J* = 7.2 Hz, 1.2 Hz, 1H), 7.03 (d, *J* = 8.4 Hz, 1H), 6.92 (td, *J* = 7.8 Hz, 1.2 Hz, 1H), 5.92 (s, 1H);

<sup>13</sup>C{<sup>1</sup>H} NMR (150 MHz, CDCl<sub>3</sub>): δ = 152.5, 141.9, 137.6, 136.0, 133.4, 131.6, 129.9, 128.9, 128.7, 128.6, 128.5, 128.2, 126.6, 126.1, 124.7, 123.1, 121.8, 121.7, 121.3, 117.2, 89.4, 87.0, 76.2; HRMS (ESI): Exact mass calcd for C<sub>29</sub>H<sub>19</sub>BrO [M+H]<sup>+</sup>: 463.0692, Found: 463.0673.

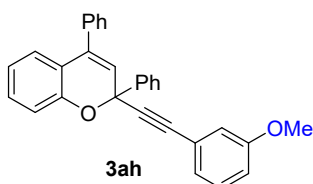

Column chromatography afforded product **3ah** in 67% yield (83.3 mg) as yellow oil; <sup>1</sup>H NMR (600 MHz, CDCl<sub>3</sub>): δ = 7.88-7.86 (m, 2H), 7.47-7.42 (m, 7H), 7.41-7.37 (m, 2H), 7.23-7.19 (m, 2H), 7.13-7.11 (m, 1H), 7.05-7.03 (m, 2H), 6.97-6.96 (m, 1H), 6.92 (td, *J* = 7.8 Hz, 1.2 Hz, 1H), 6.88 (dd, *J* = 8.4 Hz, 3.0 Hz, 1H), 5.93 (s, 1H), 3.78 (s, 3H);

<sup>13</sup>C{<sup>1</sup>H} NMR (150 MHz, CDCl<sub>3</sub>): δ = 159.2, 152.5, 142.0, 137.6, 135.7, 129.8, 129.3, 128.8, 128.53, 128.47, 128.4, 128.1, 126.6, 126.0, 124.9, 124.5, 123.3, 121.8, 121.5, 117.2, 116.6, 115.3, 88.04, 87.96, 76.2, 55.3; HRMS (ESI): Exact mass calcd for C<sub>30</sub>H<sub>22</sub>O<sub>2</sub> [M+H]<sup>+</sup>: 415.1693, Found: 415.1694.

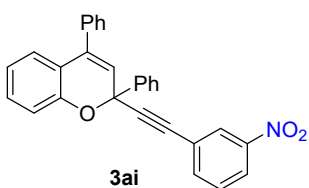

Column chromatography afforded the desired product **3ai** in 67% yield (86.3 mg) as yellow oil; <sup>1</sup>H NMR (600 MHz, CDCl<sub>3</sub>): δ = 8.28-8.279 (m, 1H), 8.17-8.15 (m, 1H), 7.86-7.85 (m, 2H), 7.73-7.71 (m, 1H), 7.49-7.44 (m, 7H), 7.42-7.41 (m, 1H), 7.40-7.39 (m, 1H), 7.27-7.24 (m, 1H), 7.14 (dd, *J* = 7.8 Hz, 1.8 Hz, 1H), 7.06 (d, *J* = 8.4 Hz, 1H), 6.95-6.93 (m, 1H), 5.93 (s, 1H);

<sup>13</sup>C{<sup>1</sup>H} NMR (150 MHz, CDCl<sub>3</sub>): δ = 152.3, 148.0, 141.4, 137.6, 137.4, 136.3, 130.0, 129.3, 128.81, 128.75, 128.6, 128.5, 128.2, 126.7, 126.5, 126.1, 124.2, 124.1, 123.4, 121.8, 121.7, 117.2, 90.9, 85.4, 75.9; HRMS (ESI): Exact mass calcd for C<sub>29</sub>H<sub>19</sub>NO<sub>3</sub> [M+H]<sup>+</sup>: 430.1438, Found: 430.1440.

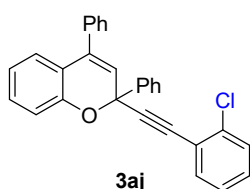

Column chromatography afforded the desired product **3aj** in 59% yield (74.1 mg) as yellow oil; <sup>1</sup>H NMR (600 MHz, CDCl<sub>3</sub>): δ = 7.93-7.91 (m, 2H), 7.46-7.42 (m,

7H), 7.41-7.36 (m, 3H), 7.25-7.22 (m, 2H), 7.19-7.16 (m, 1H), 7.13-7.12 (m, 1H), 7.06-7.04 (m, 1H), 6.93 (td,  $J = 7.8$  Hz, 1.2 Hz, 1H), 5.94 (s, 1H);  $^{13}\text{C}\{^1\text{H}\}$  NMR (150 MHz,  $\text{CDCl}_3$ ):  $\delta = 152.5, 141.6, 137.6, 136.4, 136.0, 133.4, 129.8, 129.6, 129.2, 128.9, 128.6, 128.5, 128.4, 128.1, 126.8, 126.3, 126.0, 124.9, 122.4, 122.0, 121.6, 117.3, 93.1, 85.1, 76.3$ ; HRMS (ESI): Exact mass calcd for  $\text{C}_{29}\text{H}_{19}\text{ClO}$   $[\text{M}+\text{H}]^+$ : 419.1197, Found: 419.1199.

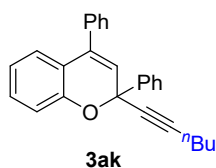

Column chromatography afforded the desired product **3ak** in 70% yield (76.5 mg) as pale yellow oil;  $^1\text{H}$  NMR (600 MHz,  $\text{CDCl}_3$ ):  $\delta = 7.81$ -7.79 (m, 2H), 7.43-7.38 (m, 7H), 7.34-7.32 (m, 1H), 7.22-7.19 (m, 1H), 7.09-7.08 (m, 1H), 7.00-6.99 (m, 1H), 6.90-6.88 (m, 1H), 5.84 (s, 1H), 2.29-2.27 (m, 2H), 1.50-1.46 (m, 2H), 1.38-1.32 (m, 2H), 0.86 (t,  $J = 7.2$  Hz, 3H);  $^{13}\text{C}\{^1\text{H}\}$  NMR (150 MHz,  $\text{CDCl}_3$ ):  $\delta = 152.7, 142.4, 137.8, 135.2, 129.6, 128.9, 128.45, 128.39, 128.0, 126.7, 125.9, 122.0, 121.4, 117.2, 89.7, 79.5, 76.0, 30.6, 21.9, 18.8, 13.6$ ; HRMS (ESI): Exact mass calcd for  $\text{C}_{27}\text{H}_{24}\text{O}$   $[\text{M}+\text{H}]^+$ : 365.1900, Found: 365.1900.

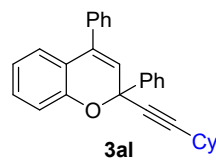

Column chromatography afforded the desired product **3al** in 75% yield (78.4 mg) as pale yellow oil;  $^1\text{H}$  NMR (600 MHz,  $\text{CDCl}_3$ ):  $\delta = 7.77$ -7.75 (m, 2H), 7.42-7.37 (m, 7H), 7.33-7.31 (m, 1H), 7.21-7.18 (m, 1H), 7.08 (dd,  $J = 7.8$  Hz, 1.8 Hz, 1H), 6.99-6.97 (m, 1H), 6.89 (td,  $J = 7.8$  Hz, 1.2 Hz, 1H), 5.81 (s, 1H), 1.33-1.30 (m, 1H), 0.80-0.77 (m, 2H), 0.72-0.70 (m, 2H);  $^{13}\text{C}\{^1\text{H}\}$  NMR (150 MHz,  $\text{CDCl}_3$ ):  $\delta = 152.6, 142.5, 137.8, 135.1, 129.7, 128.9, 128.45, 128.39, 128.1, 126.6, 125.9, 125.6, 121.8, 121.4, 117.2, 92.6, 75.9, 74.5, 8.7, 0.1$ ; HRMS (ESI): Exact mass calcd for  $\text{C}_{26}\text{H}_{20}\text{O}$   $[\text{M}+\text{H}]^+$ : 349.1587, Found: 349.1588.

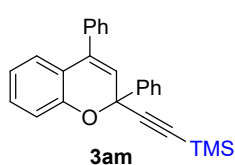

Column chromatography afforded **3am** in 52% yield (59.4 mg) as pale yellow oil;  $^1\text{H}$  NMR (600 MHz,  $\text{CDCl}_3$ ):  $\delta = 7.79$ -7.78 (m, 2H), 7.43-7.42 (m, 4H), 7.41-7.40 (m, 1H), 7.39-7.38 (m, 2H), 7.35-7.34 (m, 1H), 7.21-7.18 (m, 1H), 7.08 (dd,  $J = 7.8$  Hz, 1.2 Hz, 1H), 6.99-6.97 (m, 1H), 6.90-6.87 (m, 1H), 5.83 (s, 1H), 0.17 (s, 9H);  $^{13}\text{C}\{^1\text{H}\}$  NMR (150 MHz,  $\text{CDCl}_3$ ):  $\delta = 152.5, 141.8, 137.7, 135.6, 129.7, 128.9, 128.6, 128.48, 128.46, 128.1, 126.7, 125.9, 125.0, 121.8, 121.4, 117.2, 104.1, 93.4, 76.1, 0.1$ ; HRMS (ESI): Exact mass calcd for  $\text{C}_{26}\text{H}_{24}\text{OSi}$   $[\text{M}+\text{H}]^+$ : 381.1669, Found: 381.1670.

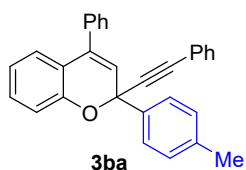

Column chromatography afforded product **3ba** in 67% yield (80.1 mg) as pale yellow oil;  $^1\text{H}$  NMR (600 MHz,  $\text{CDCl}_3$ ):  $\delta = 7.77\text{-}7.75$  (m, 2H), 7.47-7.43 (m, 6H), 7.42-7.40 (m, 1H), 7.32-7.29 (m, 3H), 7.24-7.20 (m, 3H), 7.12 (dd,  $J = 7.8$  Hz, 1.2 Hz, 1H), 7.03 (d,  $J = 7.8$  Hz, 1H), 6.91 (t,  $J = 7.8$  Hz, 1H), 5.94 (s, 1H), 2.38 (s, 3H);  $^{13}\text{C}\{^1\text{H}\}$  NMR (150 MHz,  $\text{CDCl}_3$ ):  $\delta = 152.5, 139.0, 138.4, 137.7, 135.7, 131.9, 129.7, 129.1, 128.8, 128.6, 128.4, 128.2, 128.0, 126.6, 125.9, 125.0, 122.4, 121.8, 121.4, 117.2, 88.3, 87.9, 76.0, 21.2$ ; HRMS (ESI): Exact mass calcd for  $\text{C}_{30}\text{H}_{22}\text{O}$   $[\text{M}+\text{H}]^+$ : 399.1743, Found: 399.1745.

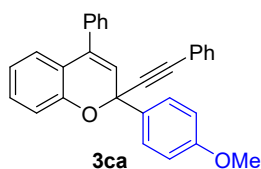

Column chromatography afforded the desired product **3ca** in 51% yield (63.4 mg) as pale yellow oil;  $^1\text{H}$  NMR (600 MHz,  $\text{CDCl}_3$ ):  $\delta = 7.81\text{-}7.78$  (m, 2H), 7.47-7.43 (m, 6H), 7.41-7.38 (m, 1H), 7.32-7.29 (m, 3H), 7.21 (td,  $J = 7.8$  Hz, 1.2 Hz, 1H), 7.11 (dd,  $J = 7.8$  Hz, 1.2 Hz, 1H), 7.05 (d,  $J = 8.4$  Hz, 1H), 6.95-6.94 (m, 2H), 6.90 (td,  $J = 7.2$  Hz, 1.2 Hz, 1H), 5.93 (s, 1H), 3.82 (s, 3H);  $^{13}\text{C}\{^1\text{H}\}$  NMR (150 MHz,  $\text{CDCl}_3$ ):  $\delta = 159.8, 152.6, 137.8, 135.8, 134.1, 132.0, 129.8, 128.9, 128.7, 128.5, 128.3, 128.2, 128.1, 126.0, 125.0, 122.4, 121.9, 121.5, 117.2, 113.8, 88.3, 88.1, 75.9, 55.4$ ; HRMS (ESI): Exact mass calcd for  $\text{C}_{30}\text{H}_{22}\text{O}_2$   $[\text{M}+\text{H}]^+$ : 415.1693, Found: 415.1693.

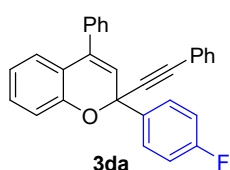

Column chromatography afforded the desired product **3da** in 62% yield (74.8 mg) as colorless oil;  $^1\text{H}$  NMR (600 MHz,  $\text{CDCl}_3$ ):  $\delta = 7.87\text{-}7.85$  (m, 2H), 7.47-7.41 (m, 7H), 7.33-7.28 (m, 3H), 7.23 (td,  $J = 7.8$  Hz, 1.2 Hz, 1H), 7.13-7.09 (m, 3H), 7.04-7.02 (m, 1H), 6.93 (t,  $J = 7.8$  Hz, 1H), 5.90 (s, 1H);  $^{13}\text{C}\{^1\text{H}\}$  NMR (150 MHz,  $\text{CDCl}_3$ ):  $\delta = 162.8$  (d,  $J_{\text{C-F}} = 246.0$  Hz), 136.0, 131.9, 129.8, 128.81, 128.78, 128.6 (d,  $J_{\text{C-F}} = 9.0$  Hz), 128.4, 128.24, 128.17, 126.0, 124.6, 122.1, 121.7, 121.6, 117.1, 115.3 (d,  $J_{\text{C-F}} = 22.5$  Hz), 88.3, 87.8, 75.6;  $^{19}\text{F}\{^1\text{H}\}$  NMR (565 MHz,  $\text{CDCl}_3$ ):  $\delta = -113.4$ ; HRMS (ESI): Exact mass calcd for  $\text{C}_{29}\text{H}_{19}\text{FO}$   $[\text{M}+\text{H}]^+$ : 403.1493, Found: 403.1493.

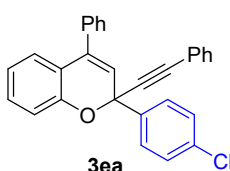

Column chromatography afforded the desired product **3ea** in 72% yield (90.5 mg) as pale yellow oil;  $^1\text{H}$  NMR (600 MHz,  $\text{CDCl}_3$ ):  $\delta = 7.81\text{-}7.79$  (m, 2H), 7.44-7.38 (m, 9H), 7.32-7.31 (m, 2H), 7.29-7.28 (m, 1H), 7.24-7.22 (m, 1H), 7.12-7.10 (m,

1H), 7.02 (d,  $J = 7.8$  Hz, 1H), 6.93-6.91 (m, 1H), 5.89 (s, 1H);  $^{13}\text{C}\{^1\text{H}\}$  NMR (150 MHz,  $\text{CDCl}_3$ ):  $\delta = 152.2, 140.6, 137.4, 136.1, 134.5, 131.9, 129.9, 128.8, 128.6, 128.4, 128.25, 128.20, 128.1, 126.0, 124.3, 122.0, 121.7, 117.1, 88.3, 87.7, 75.6$ ; HRMS (ESI): Exact mass calcd for  $\text{C}_{29}\text{H}_{19}\text{ClO}$   $[\text{M}+\text{H}]^+$ : 419.1197, Found: 419.1197.

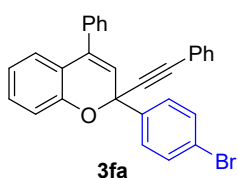

Column chromatography afforded product **3fa** in 52% yield (72.3 mg) as colorless oil;  $^1\text{H}$  NMR (600 MHz,  $\text{CDCl}_3$ ):  $\delta = 7.75\text{-}7.73$  (m, 2H), 7.56-7.54 (m, 2H), 7.44-7.41 (m, 7H), 7.33-7.28 (m, 3H), 7.23 (td,  $J = 7.8$  Hz, 1.2 Hz, 1H), 7.11 (dd,  $J = 7.8$  Hz, 1.2 Hz, 1H), 7.03 (d,  $J = 7.8$  Hz, 1H), 6.92 (td,  $J = 7.8$  Hz, 1.2 Hz, 1H), 5.89 (s, 1H);  $^{13}\text{C}\{^1\text{H}\}$  NMR (150 MHz,  $\text{CDCl}_3$ ):  $\delta = 152.2, 141.1, 137.4, 136.1, 131.9, 131.6, 129.9, 128.8, 128.45, 128.4, 128.24, 128.20, 126.0, 124.3, 122.7, 122.0, 121.7, 117.1, 88.3, 87.7, 75.6$ ; HRMS (ESI): Exact mass calcd for  $\text{C}_{29}\text{H}_{19}\text{BrO}$   $[\text{M}+\text{H}]^+$ : 463.0692, Found: 463.0692.

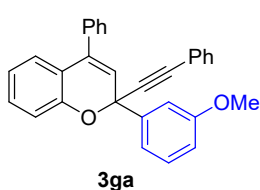

Column chromatography afforded the desired product **3ga** in 75% yield (93.3 mg) as colorless oil;  $^1\text{H}$  NMR (600 MHz,  $\text{CDCl}_3$ ):  $\delta = 7.47\text{-}7.43$  (m, 8H), 7.42-7.39 (m, 1H), 7.35 (t,  $J = 7.8$  Hz, 1H), 7.32-7.28 (m, 3H), 7.25-7.22 (m, 1H), 7.12 (dd,  $J = 7.8$  Hz, 1.2 Hz, 1H), 7.06-7.04 (m, 1H), 6.93-6.90 (m, 2H), 5.93 (s, 1H), 3.84 (s, 3H);  $^{13}\text{C}\{^1\text{H}\}$  NMR (150 MHz,  $\text{CDCl}_3$ ):  $\delta = 159.6, 152.4, 143.5, 137.6, 135.7, 131.9, 129.7, 129.5, 128.8, 128.7, 128.4, 128.2, 128.1, 126.0, 124.9, 122.3, 121.8, 121.5, 119.0, 117.2, 114.0, 112.4, 88.04, 88.02, 76.0, 55.3$ ; HRMS (ESI): Exact mass calcd for  $\text{C}_{30}\text{H}_{22}\text{O}_2$   $[\text{M}+\text{H}]^+$ : 415.1693, Found: 415.1693.

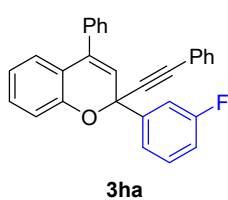

**3ha** was obtained in 68% yield (82.1 mg) as colorless oil;  $^1\text{H}$  NMR (600 MHz,  $\text{CDCl}_3$ ):  $\delta = 7.66\text{-}7.64$  (m, 1H), 7.60-7.57 (m, 1H), 7.46-7.44 (m, 6H), 7.42-7.41 (m, 1H), 7.40-7.39 (m, 1H), 7.33-7.29 (m, 3H), 7.25-7.23 (m, 1H), 7.13-7.12 (m, 1H), 7.08-7.04 (m, 2H), 6.95-6.92 (m, 1H), 5.90 (s, 1H);  $^{13}\text{C}\{^1\text{H}\}$  NMR (150 MHz,  $\text{CDCl}_3$ ):  $\delta = 162.7$  (d,  $J_{\text{C-F}} = 244.5$  Hz), 152.4, 144.6 (d,  $J_{\text{C-F}} = 7.5$  Hz), 137.4, 126.0, 131.9, 130.0 (d,  $J_{\text{C-F}} = 7.5$  Hz), 129.9, 128.8, 128.4, 128.24, 128.2, 126.1, 124.3, 122.2 (d,  $J_{\text{C-F}} = 3.0$  Hz), 121.71, 121.67, 117.1, 115.4 (d,  $J_{\text{C-F}} = 21.0$  Hz), 113.9 (d,  $J_{\text{C-F}} = 22.5$  Hz), 88.3, 87.6, 75.6;  $^{19}\text{F}\{^1\text{H}\}$  NMR (565 MHz,  $\text{CDCl}_3$ ):  $\delta = -112.2$ ; HRMS (ESI): Exact mass calcd for  $\text{C}_{29}\text{H}_{19}\text{FO}$   $[\text{M}+\text{H}]^+$ : 403.1493, Found: 403.1493.

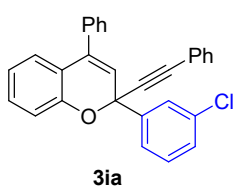

Column chromatography afforded **3ia** in 68% yield (85.4 mg) as colorless oil;  $^1\text{H}$  NMR (600 MHz,  $\text{CDCl}_3$ ):  $\delta = 7.86$  (t,  $J = 1.8$  Hz, 1H), 7.76-7.74 (m, 1H), 7.45-7.44 (m, 6H), 7.42-7.40 (m, 1H), 7.36-7.31 (m, 5H), 7.26-7.23 (m, 1H), 7.13-7.12 (m, 1H), 7.06-7.04 (m, 1H), 6.95-6.92 (m, 1H), 5.88 (s, 1H);  $^{13}\text{C}\{^1\text{H}\}$  NMR (150 MHz,  $\text{CDCl}_3$ ):  $\delta = 152.2, 144.0, 137.3, 136.1, 134.4, 131.9, 129.9, 129.7, 128.84, 128.81, 128.7, 128.4, 128.24, 128.22, 126.9, 126.1, 124.8, 124.2, 122.0, 121.7, 121.66, 117.2, 88.4, 87.5, 75.6$ ; HRMS (ESI): Exact mass calcd for  $\text{C}_{29}\text{H}_{19}\text{ClO}$   $[\text{M}+\text{H}]^+$ : 419.1197, Found: 419.1198.

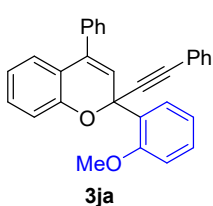

Column chromatography afforded the desired product **3ja** in 59% yield (73.4 mg) as colorless oil;  $^1\text{H}$  NMR (600 MHz,  $\text{CDCl}_3$ ):  $\delta = 7.85$ -7.84 (m, 1H), 7.43-7.37 (m, 8H), 7.33 (td,  $J = 7.8$  Hz, 1.2 Hz, 1H), 7.28-7.26 (m, 2H), 7.24-7.21 (m, 1H), 7.13-7.11 (m, 1H), 7.07 (dd,  $J = 7.8$  Hz, 1.2 Hz, 1H), 7.01-6.99 (m, 2H), 6.90-6.88 (m, 1H), 6.20 (s, 1H), 3.91 (s, 3H);  $^{13}\text{C}\{^1\text{H}\}$  NMR (150 MHz,  $\text{CDCl}_3$ ):  $\delta = 157.0, 152.8, 138.1, 134.1, 131.8, 129.6, 129.3, 128.9, 128.3, 128.1, 127.8, 127.2, 125.8, 124.9, 122.8, 122.0, 121.3, 120.4, 117.0, 112.4, 88.7, 86.0, 74.4, 55.9$ ; HRMS (ESI): Exact mass calcd for  $\text{C}_{30}\text{H}_{22}\text{O}_2$   $[\text{M}+\text{H}]^+$ : 415.1693, Found: 415.1694.

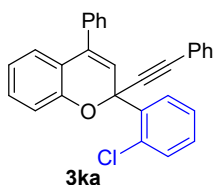

Column chromatography afforded the desired product **3ka** in 66% yield (82.9 mg) as white solid; Mp: 124-126°C;  $^1\text{H}$  NMR (600 MHz,  $\text{CDCl}_3$ ):  $\delta = 8.00$ -7.99 (m, 1H), 7.47-7.46 (m, 1H), 7.44-7.38 (m, 7H), 7.32-7.28 (m, 5H), 7.27-7.24 (m, 2H), 7.13-7.10 (m, 2H), 6.94-6.91 (m, 1H), 6.18 (s, 1H);  $^{13}\text{C}\{^1\text{H}\}$  NMR (150 MHz,  $\text{CDCl}_3$ ):  $\delta = 152.4, 138.2, 137.7, 135.8, 132.8, 131.8, 131.7, 129.7, 129.6, 128.8, 128.6, 128.5, 128.4, 128.2, 128.0, 126.6, 126.1, 123.3, 122.3, 121.9, 121.6, 117.1, 88.0, 87.2, 75.2$ ; HRMS (ESI): Exact mass calcd for  $\text{C}_{29}\text{H}_{19}\text{ClO}$   $[\text{M}+\text{H}]^+$ : 419.1197, Found: 419.1199.

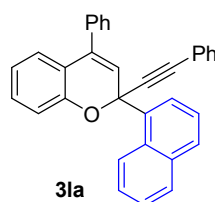

Column chromatography afforded the desired product **3la** in 66% yield (86.0 mg) as white solid; Mp: 59-61°C;  $^1\text{H}$  NMR (600 MHz,  $\text{CDCl}_3$ ):  $\delta = 8.94$  (d,  $J = 9.0$  Hz, 1H), 8.17-8.16 (m, 1H), 7.90-7.87 (m, 2H), 7.56-7.534 (m, 1H), 7.527-7.51 (m, 3H), 7.50-7.47 (m, 1H), 7.46-7.43 (m, 2H), 7.41-7.40 (m, 3H), 7.30-7.26 (m, 3H), 7.22-7.18 (m, 2H), 7.03-7.01 (m, 1H), 6.95-6.92 (m, 1H), 6.15 (s, 1H);  $^{13}\text{C}\{^1\text{H}\}$  NMR (150 MHz,  $\text{CDCl}_3$ ):  $\delta = 152.6, 137.7, 136.3, 135.7, 134.8, 131.8, 130.7, 130.2, 129.7, 128.85, 128.82, 128.6, 128.4, 128.2, 128.1, 126.6,$

126.1, 125.9, 125.8, 125.6, 125.3, 124.7, 122.4, 122.3, 121.7, 117.4, 89.0, 88.4, 76.6; HRMS (ESI): Exact mass calcd for C<sub>33</sub>H<sub>22</sub>O [M+H]<sup>+</sup>: 435.1743, Found: 435.1745.

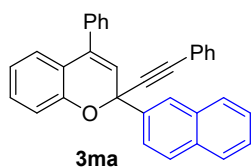

Column chromatography afforded product **3ma** in 52% yield (67.8 mg) as white solid; Mp: 46-48 °C; <sup>1</sup>H NMR (600 MHz, CDCl<sub>3</sub>): δ = 8.32 (d, *J* = 1.2 Hz, 1H), 8.00-7.98 (m, 1H), 7.92-7.91 (m, 2H), 7.87-7.85 (m, 1H), 7.53-7.504 (m, 3H), 7.496-7.48 (m, 3H), 7.46-7.44 (m, 2H), 7.42-7.40 (m, 1H), 7.34-7.30 (m, 3H),

7.26-7.23 (m, 1H), 7.16-7.14 (m, 1H), 7.09-7.07 (m, 1H), 6.93 (td, *J* = 7.8 Hz, 1.2 Hz, 1H), 6.04 (s, 1H); <sup>13</sup>C{<sup>1</sup>H} NMR (150 MHz, CDCl<sub>3</sub>): δ = 152.5, 139.1, 137.6, 136.0, 133.2, 132.9, 131.9, 129.8, 128.9, 128.7, 128.5, 128.4, 128.2, 128.1, 127.6, 126.5, 126.3, 126.0, 125.6, 124.7, 124.5, 122.3, 121.8, 121.6, 117.2, 88.3, 88.1, 76.2; HRMS (ESI): Exact mass calcd for C<sub>33</sub>H<sub>22</sub>O [M+H]<sup>+</sup>: 435.1743, Found: 435.1747.

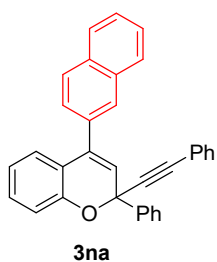

Column chromatography afforded **3na** in 74% yield (96.5 mg) as yellow solid; Mp: 51-53 °C; <sup>1</sup>H NMR (600 MHz, CDCl<sub>3</sub>): δ = 7.95 (d, *J* = 1.8 Hz, 1H), 7.92-7.88 (m, 5H), 7.56-7.55 (m, 1H), 7.53-7.50 (m, 2H), 7.47-7.44 (m, 4H), 7.39-7.36 (m, 1H), 7.32-7.29 (m, 3H), 7.26-7.23 (m, 1H), 7.16-7.14 (m, 1H), 7.08-7.06 (m, 1H), 6.94-6.91 (m, 1H), 6.045-6.036 (m, 1H); <sup>13</sup>C{<sup>1</sup>H} NMR (150 MHz, CDCl<sub>3</sub>): δ = 152.5,

141.9, 135.7, 135.1, 133.3, 133.0, 131.9, 129.8, 128.7, 128.6, 128.5, 128.2, 128.0, 127.9, 127.8, 127.7, 126.8, 126.6, 126.3, 126.2, 126.1, 125.3, 122.3, 121.9, 121.6, 117.2, 88.2, 88.0, 76.2; HRMS (ESI): Exact mass calcd for C<sub>33</sub>H<sub>22</sub>O [M+H]<sup>+</sup>: 435.1743, Found: 435.1744.

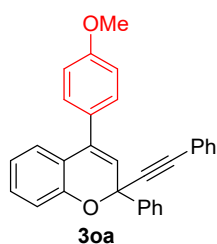

Column chromatography afforded **3oa** in 57% yield (70.9 mg) as colorless oil; <sup>1</sup>H NMR (600 MHz, CDCl<sub>3</sub>): δ = 7.88-7.87 (m, 2H), 7.43-7.37 (m, 7H), 7.30-7.26 (m, 3H), 7.24-7.22 (m, 1H), 7.15-7.14 (m, 1H), 7.04-7.03 (m, 1H), 6.97-6.92 (m, 3H), 5.89 (s, 1H), 3.86 (s, 3H); <sup>13</sup>C{<sup>1</sup>H} NMR (150 MHz, CDCl<sub>3</sub>): δ = 159.5, 152.5, 142.0, 135.2, 131.9, 130.0, 129.9, 129.6, 128.6, 128.5, 128.4, 128.2, 126.6, 126.0, 124.2,

122.3, 122.0, 121.5, 117.1, 113.8, 88.2, 88.0, 76.1, 55.3; HRMS (ESI): Exact mass calcd for C<sub>30</sub>H<sub>22</sub>O<sub>2</sub> [M+H]<sup>+</sup>: 415.1693, Found: 415.1692.

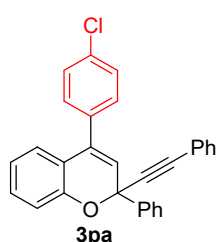

Column chromatography **3pa** in 57% yield (71.6 mg) as white solid; Mp: 105-107 °C; <sup>1</sup>H NMR (600 MHz, CDCl<sub>3</sub>): δ = 7.86-7.85 (m, 2H), 7.44-7.42 (m, 4H), 7.40-7.37 (m,

5H), 7.32-7.29 (m, 3H), 7.24-7.23 (m, 1H), 7.07-7.04 (m, 2H), 6.94-6.91 (m, 1H), 5.91 (s, 1H);  $^{13}\text{C}\{^1\text{H}\}$  NMR (150 MHz,  $\text{CDCl}_3$ ):  $\delta = 152.4, 141.7, 136.0, 134.7, 134.0, 131.9, 130.2, 130.0, 128.7, 128.63, 128.61, 128.5, 128.2, 126.6, 125.6, 125.2, 122.2, 121.6, 121.4, 117.3, 88.2, 87.8, 76.0$ ; HRMS (ESI): Exact mass calcd for  $\text{C}_{29}\text{H}_{19}\text{ClO}$   $[\text{M}+\text{H}]^+$ : 419.1197, Found: 419.1196.

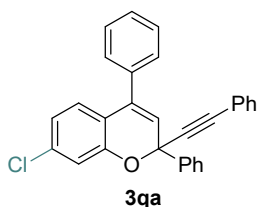

Column chromatography **3qa** in 64% yield (80.4 mg) as white solid; Mp: 40-42 °C;  $^1\text{H}$  NMR (600 MHz,  $\text{CDCl}_3$ ):  $\delta = 7.86-7.85$  (m, 2H), 7.47-7.43 (m, 9H), 7.42-7.39 (m, 2H), 7.33-7.31 (m, 2H), 7.06-7.04 (m, 2H), 6.90-6.89 (m, 1H), 5.93 (s, 1H);  $^{13}\text{C}\{^1\text{H}\}$  NMR (150 MHz,  $\text{CDCl}_3$ ):  $\delta = 153.1, 141.4, 137.1, 135.0, 134.7, 131.9, 128.8, 128.7, 128.5, 128.3, 128.2, 126.8, 126.6, 124.8, 122.0, 121.7, 120.4, 117.5, 88.5, 87.5, 76.6$ ; HRMS (ESI): Exact mass calcd for  $\text{C}_{29}\text{H}_{19}\text{ClO}$   $[\text{M}+\text{H}]^+$ : 419.1197, Found: 419.1198.

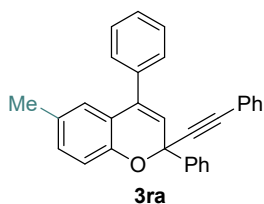

Column chromatography **3ra** in 67% yield (80.1 mg) as white solid; Mp: 34-35 °C;  $^1\text{H}$  NMR (600 MHz,  $\text{CDCl}_3$ ):  $\delta = 7.88-7.86$  (m, 2H), 7.46-7.44 (m, 7H), 7.42-7.41 (m, 2H), 7.37-7.36 (m, 1H), 7.32-7.29 (m, 3H), 7.03 (dd,  $J = 7.8$  Hz, 1.8 Hz, 1H), 6.95-6.93 (m, 1H), 6.91 (d,  $J = 1.8$  Hz, 1H), 5.92 (s, 1H), 2.22 (s, 3H);  $^{13}\text{C}\{^1\text{H}\}$  NMR (150 MHz,  $\text{CDCl}_3$ ):  $\delta = 150.2, 142.0, 137.7, 135.8, 131.9, 130.7, 130.2, 128.8, 128.6, 128.5, 128.42, 128.39, 128.2, 128.0, 126.6, 126.3, 125.0, 122.3, 121.5, 116.9, 88.2, 87.9, 75.9$ ; HRMS (ESI): Exact mass calcd for  $\text{C}_{30}\text{H}_{22}\text{O}$   $[\text{M}+\text{H}]^+$ : 399.1743, Found: 399.1744.

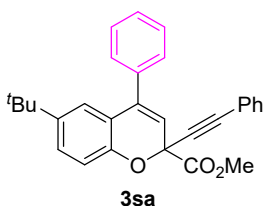

Column chromatography **3sa** in 76% yield (96.3 mg) as orange oil;  $^1\text{H}$  NMR (600 MHz,  $\text{CDCl}_3$ ):  $\delta = 7.45-7.42$  (m, 7H), 7.33-7.27 (m, 4H), 7.104-7.099 (m, 1H), 7.08 (d,  $J = 8.4$  Hz, 1H), 6.02 (s, 1H), 3.90 (s, 3H), 1.21 (s, 9H);  $^{13}\text{C}\{^1\text{H}\}$  NMR (150 MHz,  $\text{CDCl}_3$ ):  $\delta = 168.6, 149.8, 144.6, 137.7, 137.2, 132.1, 129.0, 128.8, 128.4, 128.3, 128.2, 127.0, 123.2, 121.6, 120.3, 119.6, 116.4, 86.4, 85.1, 74.2, 53.6, 34.3, 31.4$ ; HRMS (ESI): Exact mass calcd for  $\text{C}_{29}\text{H}_{26}\text{O}_3$   $[\text{M}+\text{H}]^+$ : 423.1955, Found: 423.1960.

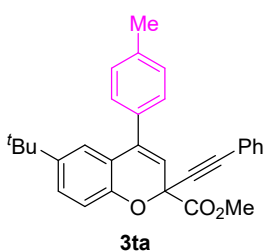

Column chromatography **3ta** in 76% yield (99.5 mg) as orange solid; Mp: 49-51 °C;  $^1\text{H}$  NMR (600 MHz,  $\text{CDCl}_3$ ):  $\delta = 7.45-7.44$  (m, 2H), 7.33-7.26 (m, 6H), 7.25-7.24 (m, 2H), 7.13 (d,  $J = 2.4$  Hz, 1H), 7.07 (d,  $J = 8.4$  Hz, 1H), 5.99 (s, 1H), 3.89 (s, 3H), 2.42 (s, 3H), 1.22 (s, 9H);  $^{13}\text{C}\{^1\text{H}\}$  NMR (150 MHz,  $\text{CDCl}_3$ ):  $\delta =$



168.6, 149.8, 144.6, 138.2, 127.6, 134.2, 132.1, 129.1, 129.0, 128.6, 128.2, 126.9, 123.2, 121.6, 120.4, 119.2, 116.4, 86.3, 85.1, 74.1, 53.6, 34.3, 31.4, 21.3; HRMS (ESI): Exact mass calcd for C<sub>30</sub>H<sub>28</sub>O<sub>2</sub> [M+H]<sup>+</sup>: 437.2111, Found: 453.2060.

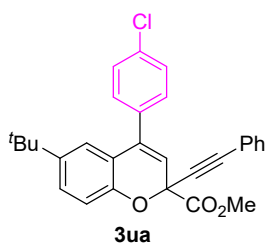

Column chromatography **3ua** in 68% yield (93.2 mg) as yellow solid; Mp: 48-50 °C; <sup>1</sup>H NMR (600 MHz, CDCl<sub>3</sub>): δ = 7.45-7.43 (m, 2H), 7.42-7.41 (m, 2H), 7.37-7.36 (m, 2H), 7.33-7.32 (m, 1H), 7.30-7.28 (m, 3H), 7.08 (d, *J* = 3.0 Hz, 1H), 7.03 (d, *J* = 2.4 Hz, 1H), 6.01 (s, 1H), 3.90 (s, 3H), 1.22 (s, 9H); <sup>13</sup>C{<sup>1</sup>H} NMR (150 MHz, CDCl<sub>3</sub>): δ = 168.4, 149.7, 144.8, 136.7, 135.6, 134.3, 132.1, 130.1, 129.1, 128.7, 128.2, 127.3, 122.9, 121.5, 120.03, 119.95, 116.6, 86.5, 84.8, 74.0, 53.7, 34.3, 31.4; HRMS (ESI): Exact mass calcd for C<sub>29</sub>H<sub>25</sub>ClO<sub>3</sub> [M+H]<sup>+</sup>: 457.1565, Found: 457.1567.

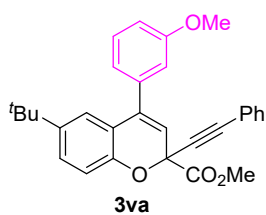

Column chromatography **3va** in 75% yield (101.8 mg) as colorless oil; <sup>1</sup>H NMR (600 MHz, CDCl<sub>3</sub>): δ = 7.45-7.44 (m, 2H), 7.33-7.32 (m, 1H), 7.30-7.27 (m, 4H), 7.15-7.14 (m, 1H), 7.08 (d, *J* = 8.4 Hz, 1H), 7.02 (d, *J* = 7.2 Hz, 1H), 6.97-6.96 (m, 2H), 6.03 (s, 1H), 3.90 (s, 3H), 3.83 (s, 3H), 1.12 (s, 9H); <sup>13</sup>C{<sup>1</sup>H} NMR (150 MHz, CDCl<sub>3</sub>): δ = 168.5, 159.5, 149.7, 144.6, 138.5, 137.6, 132.1, 129.4, 129.0, 128.2, 127.92, 127.90, 127.0, 123.2, 121.6, 121.2, 120.2, 119.6, 116.4, 114.4, 113.8, 86.4, 85.0, 74.1, 55.3, 53.7, 34.3, 31.4; HRMS (ESI): Exact mass calcd for C<sub>30</sub>H<sub>28</sub>O<sub>4</sub> [M+H]<sup>+</sup>: 453.2060, Found: 453.2063.

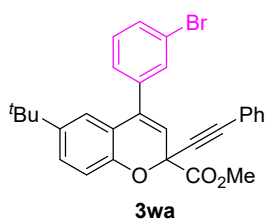

Column chromatography **3wa** in 43% yield (64.7 mg) as yellow solid; Mp: 42-44 °C; <sup>1</sup>H NMR (600 MHz, CDCl<sub>3</sub>): δ = 7.61-7.60 (m, 1H), 7.55-7.54 (m, 1H), 7.45-7.44 (m, 2H), 7.34-7.32 (m, 2H), 7.31-7.28 (m, 4H), 7.08 (d, *J* = 9.0 Hz, 1H), 7.05 (d, *J* = 2.4 Hz, 1H), 6.04 (s, 1H), 3.90 (s, 3H), 1.22 (s, 9H); <sup>13</sup>C{<sup>1</sup>H} NMR (150 MHz, CDCl<sub>3</sub>): δ = 168.3, 149.7, 144.8, 139.2, 136.5, 132.1, 131.8, 131.4, 129.9, 129.1, 128.2, 127.4, 127.3, 122.9, 122.5, 121.5, 120.3, 119.9, 116.6, 86.6, 84.7, 74.0, 53.8, 34.3, 31.3; HRMS (ESI): Exact mass calcd for C<sub>29</sub>H<sub>25</sub>BrO<sub>3</sub> [M+H]<sup>+</sup>: 501.1060, Found: 501.1063.

### 3. Gram-scale synthesis and product elaboration

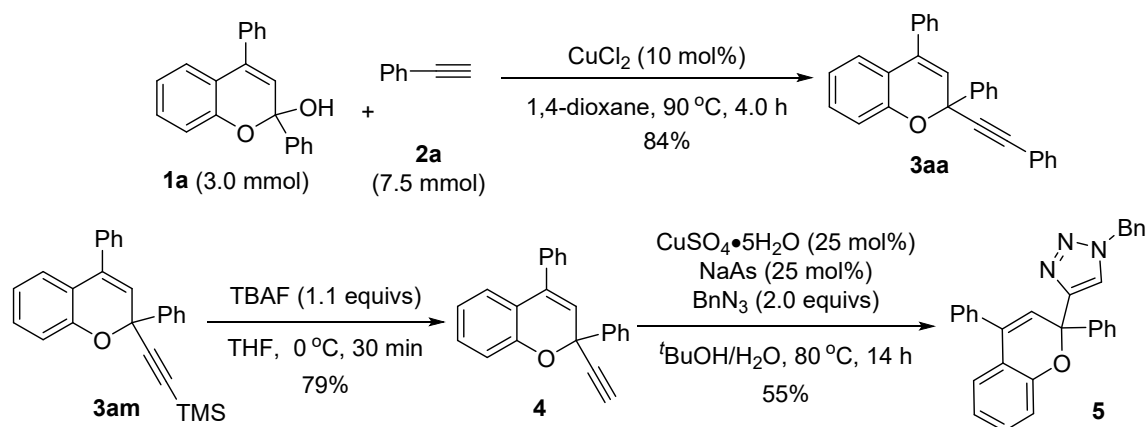

### 3.1 Gram-scale synthesis

To a 100 mL round bottom flask were added **1a** (0.90 g, 3.0 mmol, 1.0 equiv), phenylacetylene **2a** (0.77 g, 7.5 mmol, 2.5 equivs) and 30.0 mL of anhydrous 1,4-dioxane. After adding  $\text{CuCl}_2$  (40.0 mg, 10 mol%), the reaction mixture was stirred at 90 °C till almost full conversion of **1a** by TLC analysis. The reaction mixture was directly subjected to column chromatography using petroleum ether as the eluent to afford the desired product **3aa** in 84% yield (0.97 g).

### 3.2 Product elaboration

#### 1) The synthesis of **4**

To a 10-mL round bottom flask were added sequentially **3am** (114.2 mg, 0.3 mmol), 5.0 mL of THF and TBAF (86.3 mg, 0.33 mmol, 1.1 equivs). The reaction mixture was stirred at 0 °C till almost full conversion of **3am** by TLC analysis. The reaction is terminated by the addition of 20 mL saturated aqueous  $\text{NH}_4\text{Cl}$ . The organic layer was extracted with ethyl acetate (3×10 mL) and then dried with  $\text{Na}_2\text{SO}_4$ . After removing the solvent, the residue was then subjected to column chromatography using petroleum ether /ethyl acetate (generally 40:1, v:v) as the eluent to afford the desired product **4** in 79% yield (73.1 mg) as colorless oil;  $^1\text{H NMR}$  (400 MHz,  $\text{CDCl}_3$ ):  $\delta = 7.84\text{-}7.82$  (m, 2H), 7.44-7.37 (m, 8H), 7.25-7.23 (m, 1H), 7.14-7.12 (m, 1H), 7.04 (d,  $J = 8.0$  Hz, 1H), 6.94 (t,  $J = 7.6$  Hz, 1H), 5.86 (s, 1H), 2.82 (s, 1H);  $^{13}\text{C}\{^1\text{H}\}$  NMR (100 MHz,  $\text{CDCl}_3$ ):  $\delta = 152.2, 141.3, 137.4, 136.0, 129.8, 128.8, 128.6, 128.5, 128.4, 128.2, 126.5, 126.0, 124.6, 121.8, 121.7, 117.1, 82.7, 76.2, 75.4, 76.2, 75.4$ ; HRMS (ESI): Exact mass calcd for  $\text{C}_{23}\text{H}_{16}\text{O}$   $[\text{M}+\text{H}]^+$ : 309.1274, Found: 309.1268.

#### 2) The synthesis of **5**

To a 25 mL of Schlenk tube were added sequentially **4** (61.7 mg, 0.2 mmol), CuSO<sub>4</sub>·5H<sub>2</sub>O (12.5 mg, 0.05 mmol, 0.25 equivs), sodium ascorbate (9.9 mg, 0.05 mmol, 0.25 equiv), and 4.0 mL H<sub>2</sub>O and 4.0 mL *t*BuOH (4.0 mL). After adding BnN<sub>3</sub> (53.3 mg, 0.4 mmol, 2.0 equivs), the mixture was stirred at 80 °C under N<sub>2</sub> atmosphere till almost full conversion of **4** by TLC analysis. Then, the reaction is terminated by the addition of 20.0 mL saturated aqueous NH<sub>4</sub>Cl. The organic layer was extract with ethyl acetate (3×10 mL) and then dried with Na<sub>2</sub>SO<sub>4</sub>. After removing the solvent, the residue was then subjected to column chromatography using petroleum ether /ethyl acetate (generally 5:1, v:v) as the eluent to afford the desired product **5** in 55% yield (73.1 mg) as white solid; <sup>1</sup>H NMR (400 MHz, CDCl<sub>3</sub>): δ = 7.62-7.60 (m, 2H), 7.48 (s, 1H), 7.43-7.30 (m, 11H), 7.24-7.22 (m, 2H), 7.18-7.14 (m, 1H), 7.04-6.99 (m, 2H), 6.83 (t, *J* = 7.6 Hz, 1H), 6.47 (s, 1H), 5.50 (AB, *J* = 15.6 Hz, 1H), 5.46 (AB, *J* = 16.0 Hz, 1H); <sup>13</sup>C {<sup>1</sup>H} NMR (100 MHz, CDCl<sub>3</sub>): δ = 152.5, 152.4, 143.4, 137.7, 135.7, 134.5, 129.6, 129.1, 128.8, 128.7, 128.34, 128.26, 128.03, 128.02, 127.8, 126.2, 126.1, 126.0, 122.3, 121.6, 121.4, 116.9, 78.2, 54.1; HRMS (ESI): Exact mass calcd for C<sub>30</sub>H<sub>23</sub>N<sub>3</sub>O [M+H]<sup>+</sup>: 442.1914, Found: 442.1916.

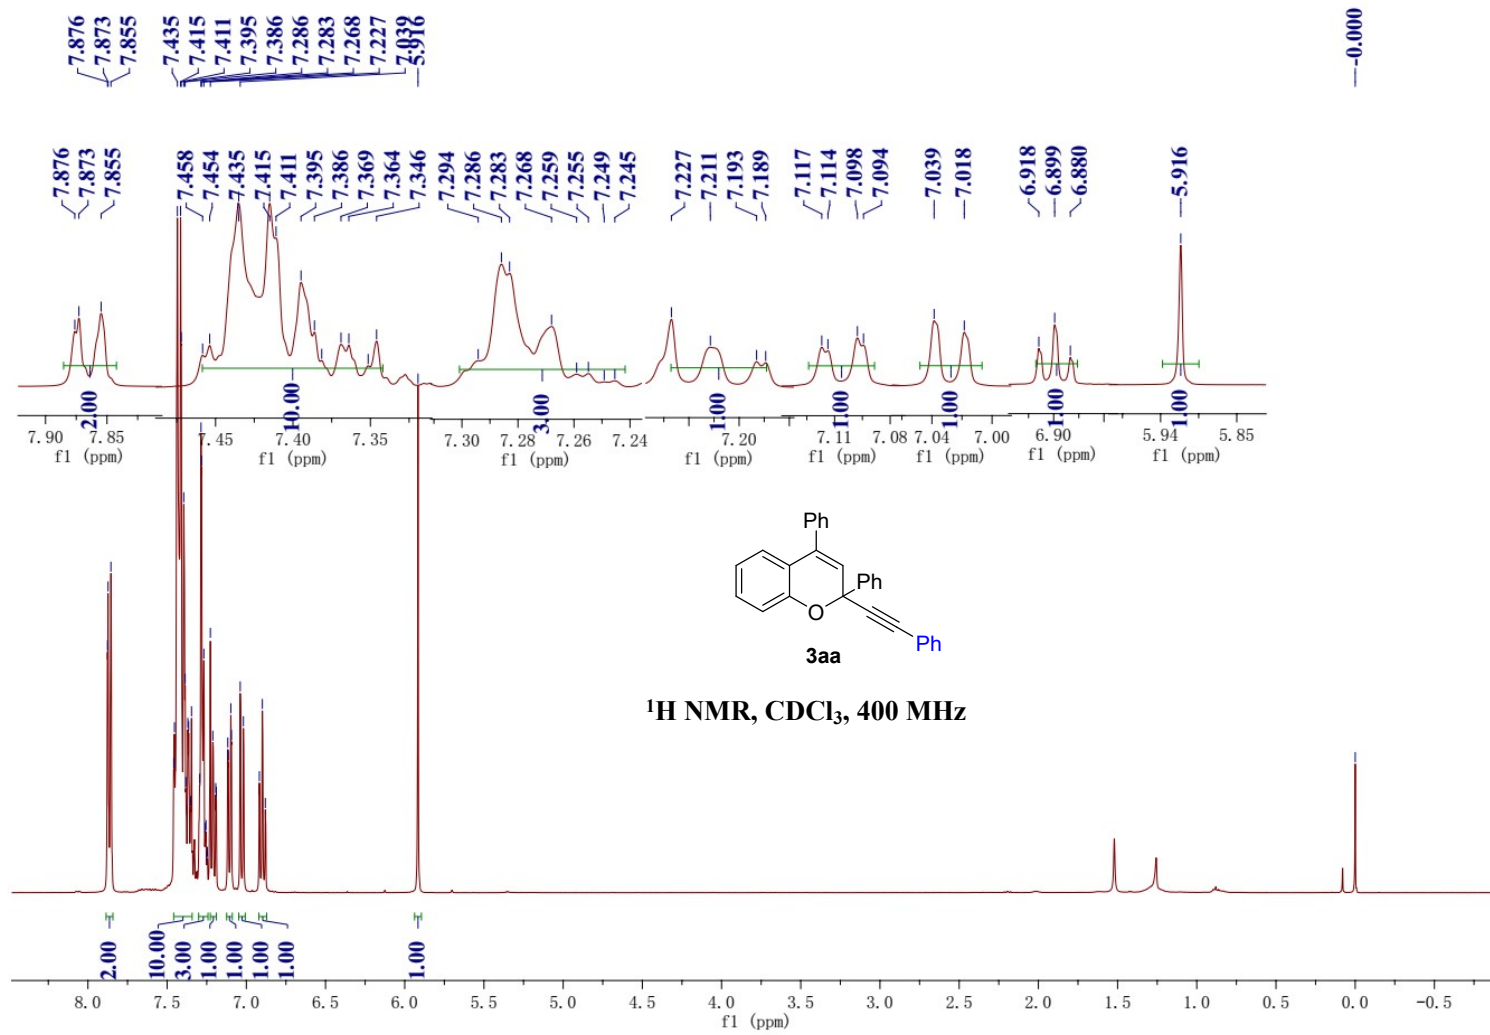

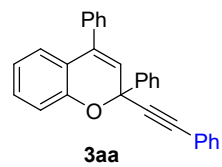

<sup>13</sup>C NMR, CDCl<sub>3</sub>, 100 MHz

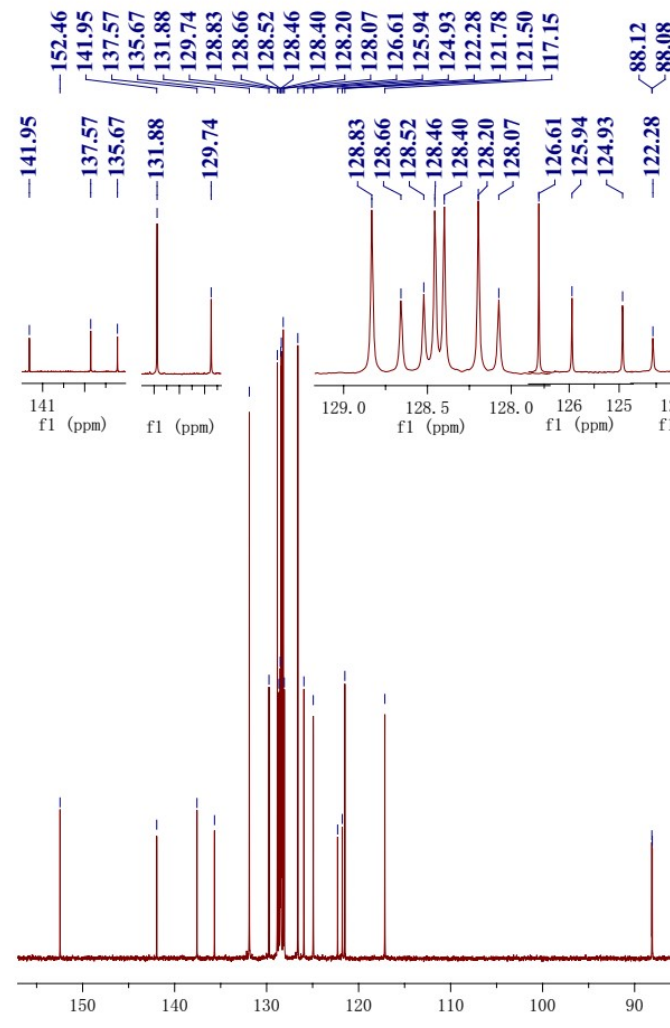

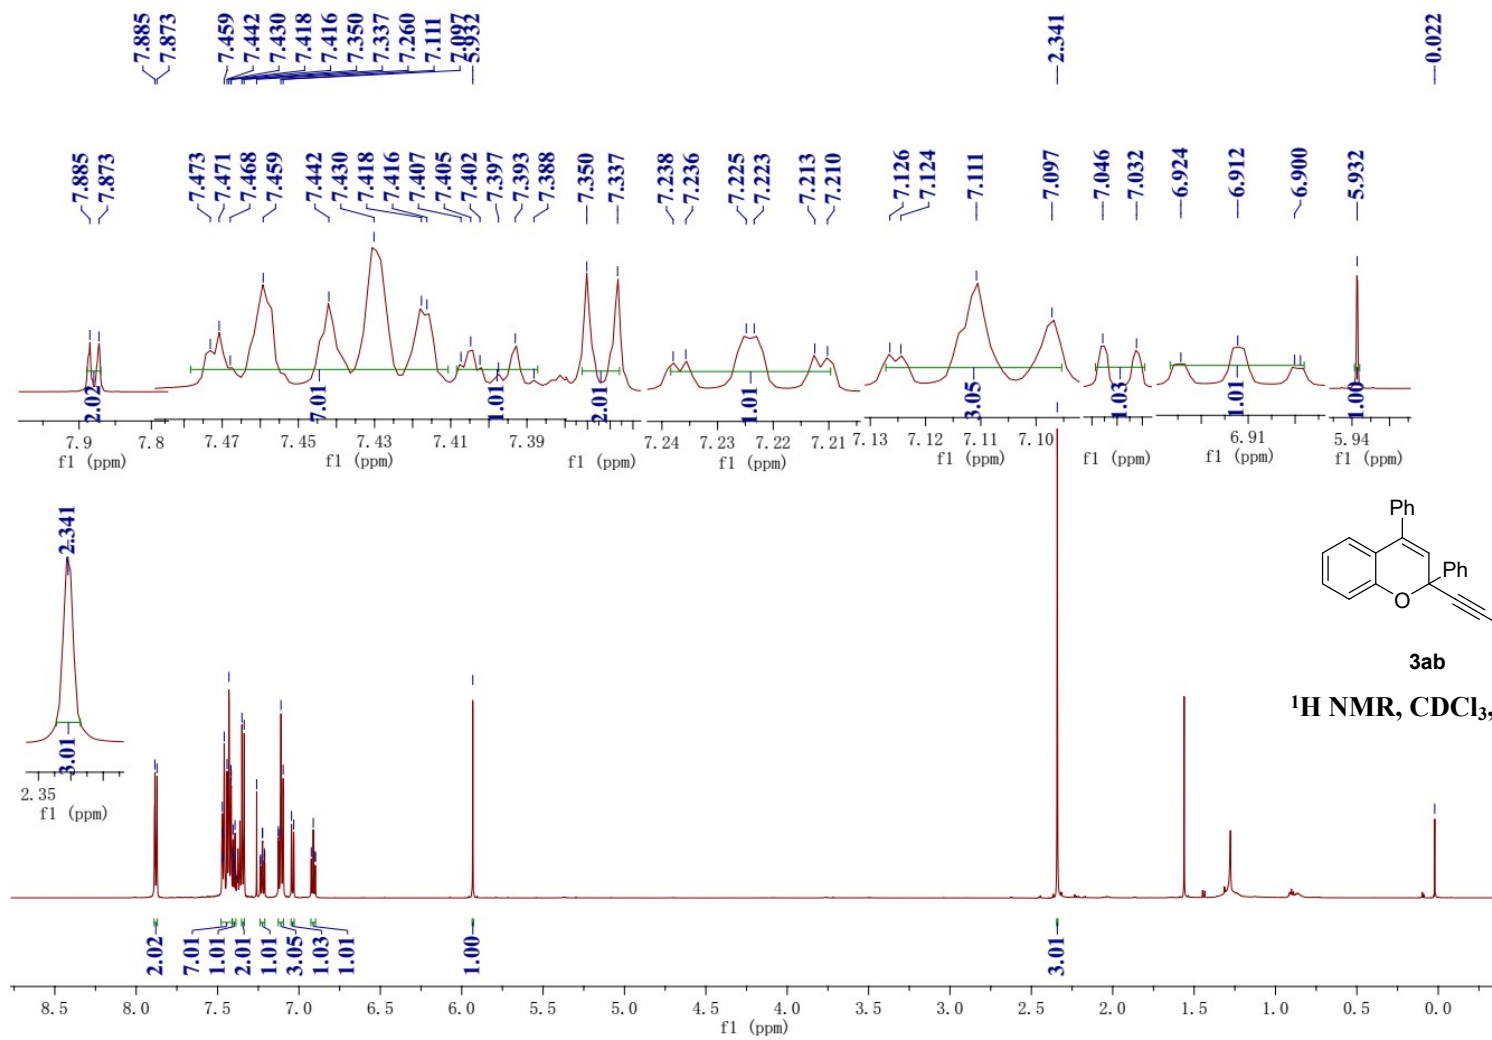

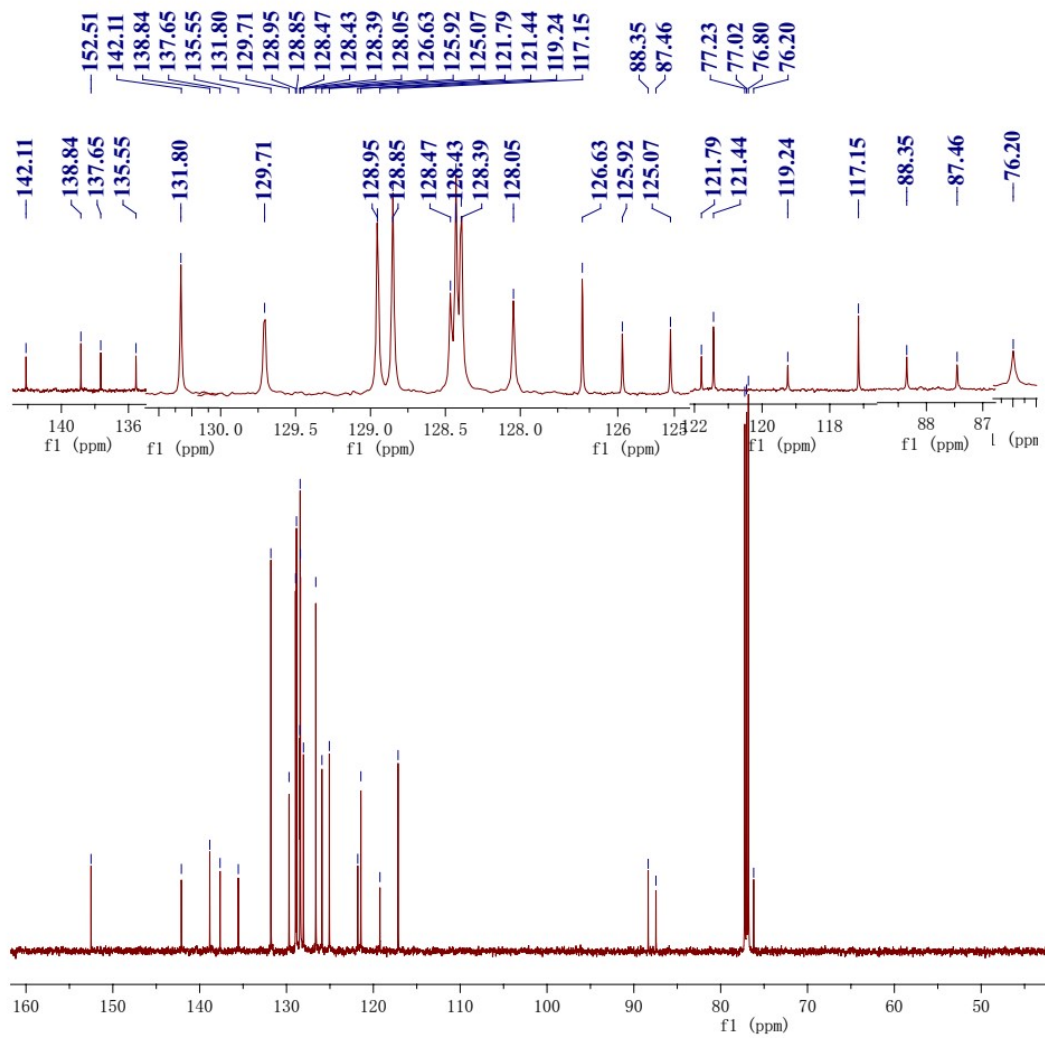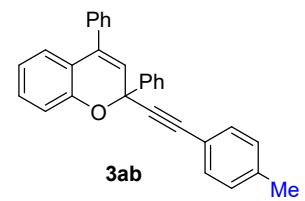

**3ab**  
<sup>13</sup>C NMR, CDCl<sub>3</sub>, 150 MHz

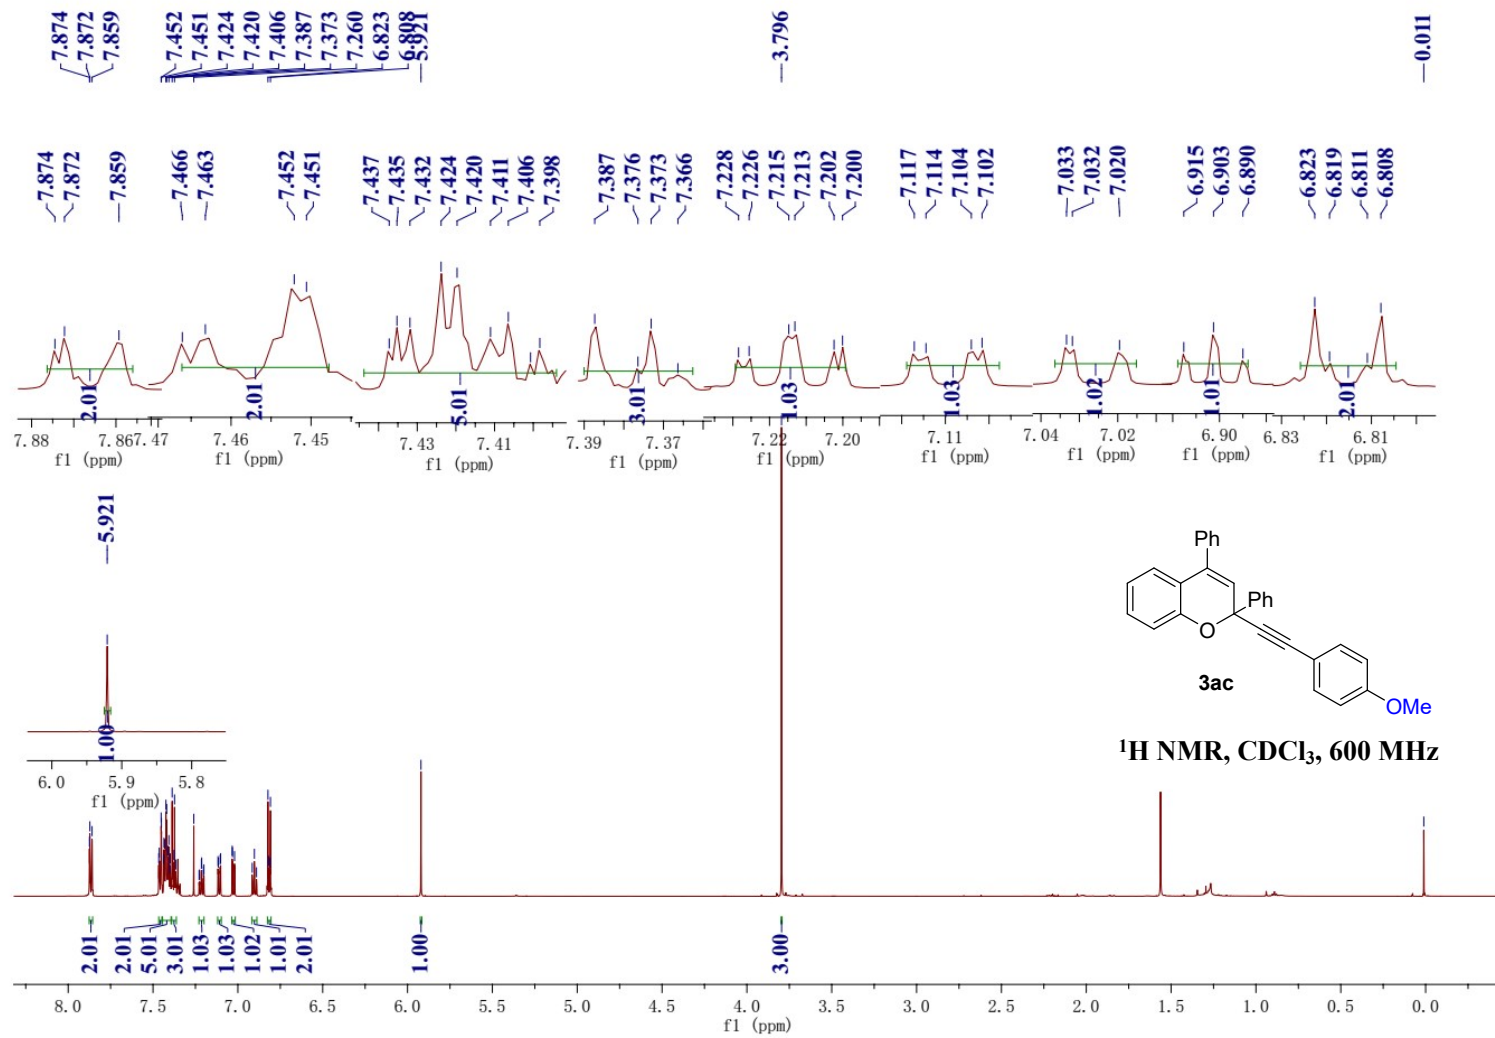



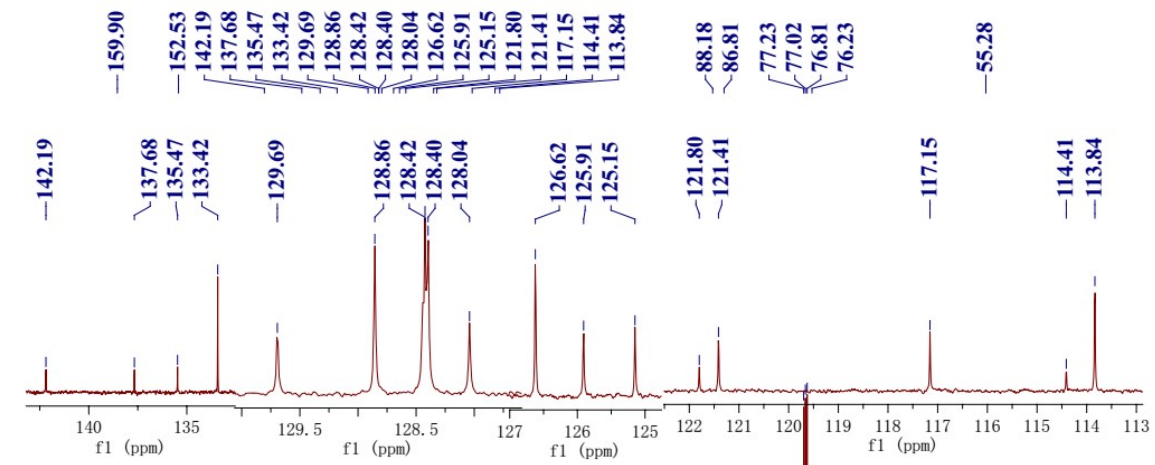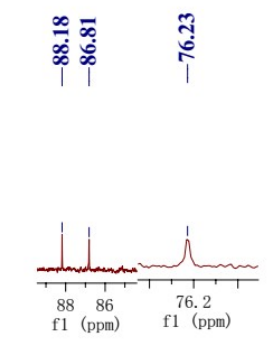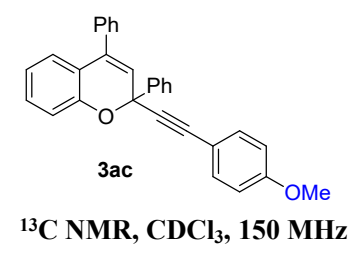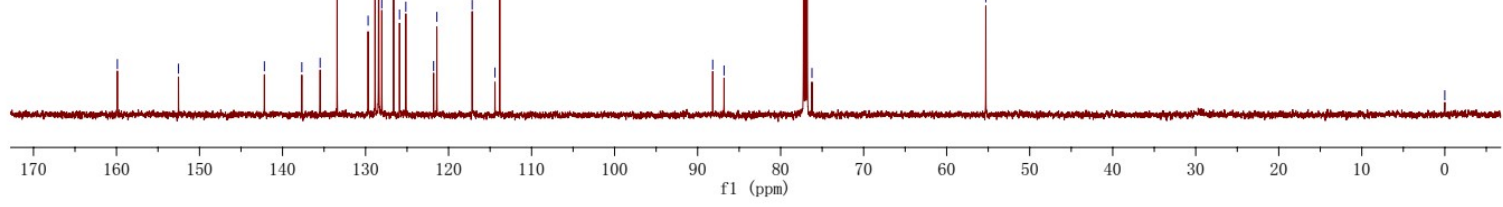

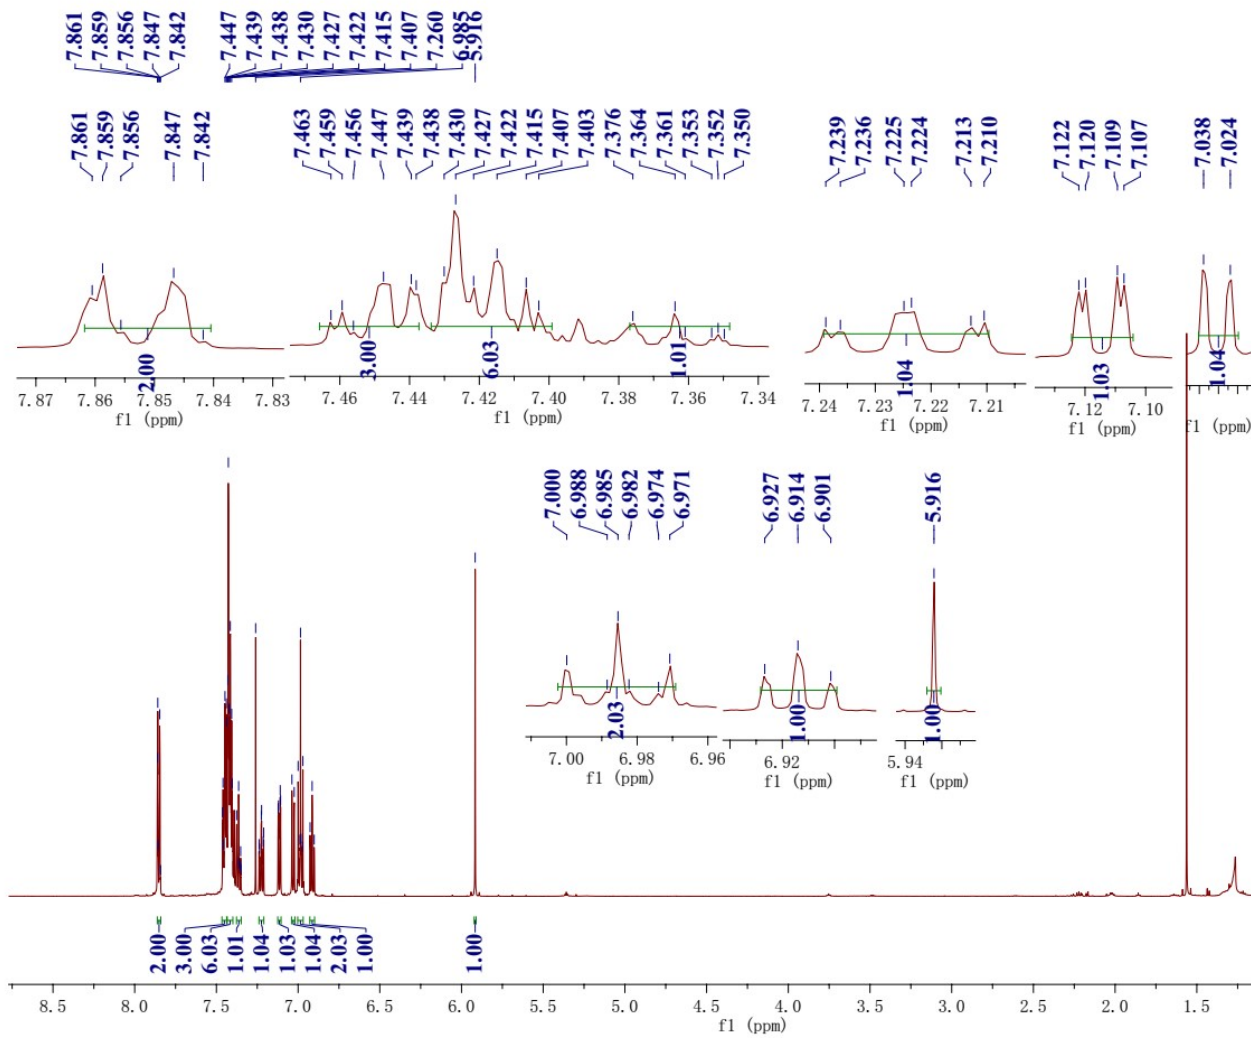

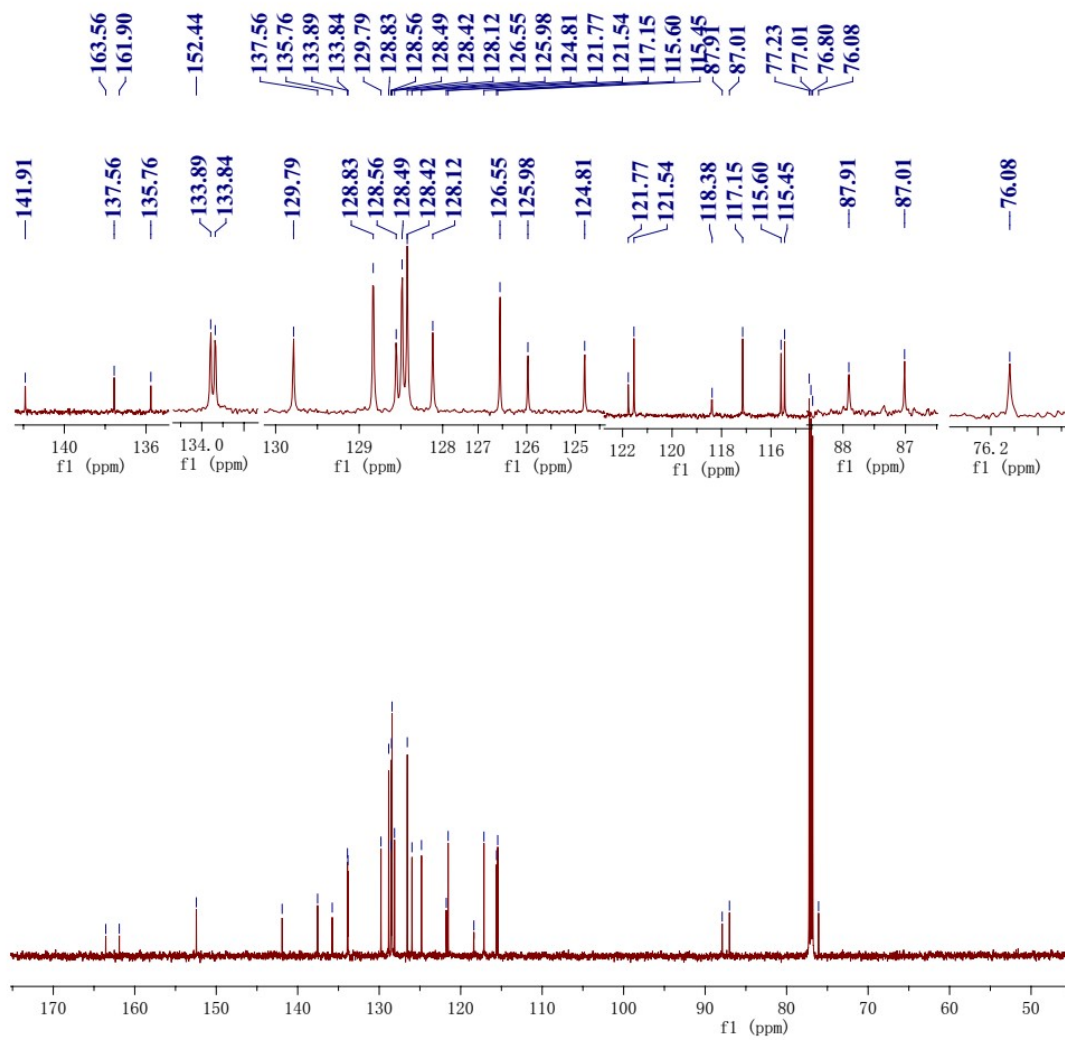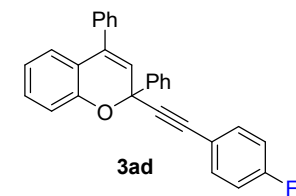

$^{13}\text{C}$  NMR,  $\text{CDCl}_3$ , 150 MHz

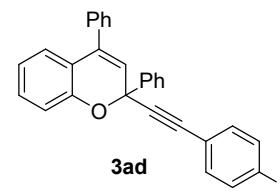

**<sup>19</sup>F NMR, CDCl<sub>3</sub>, 565 MHz**

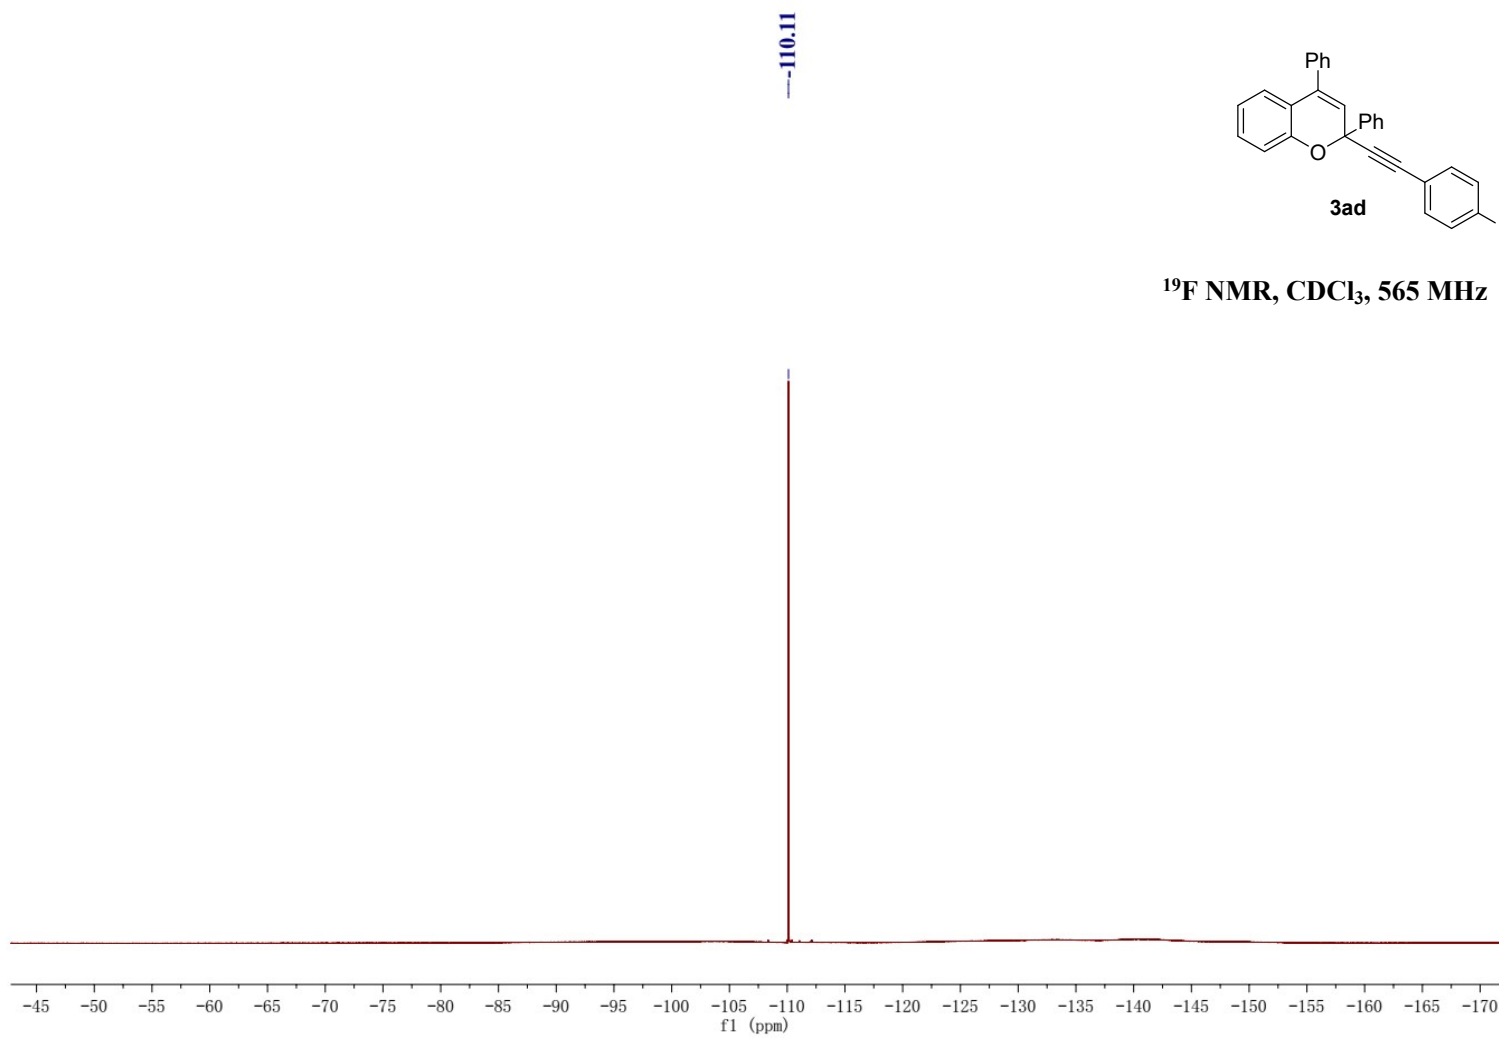

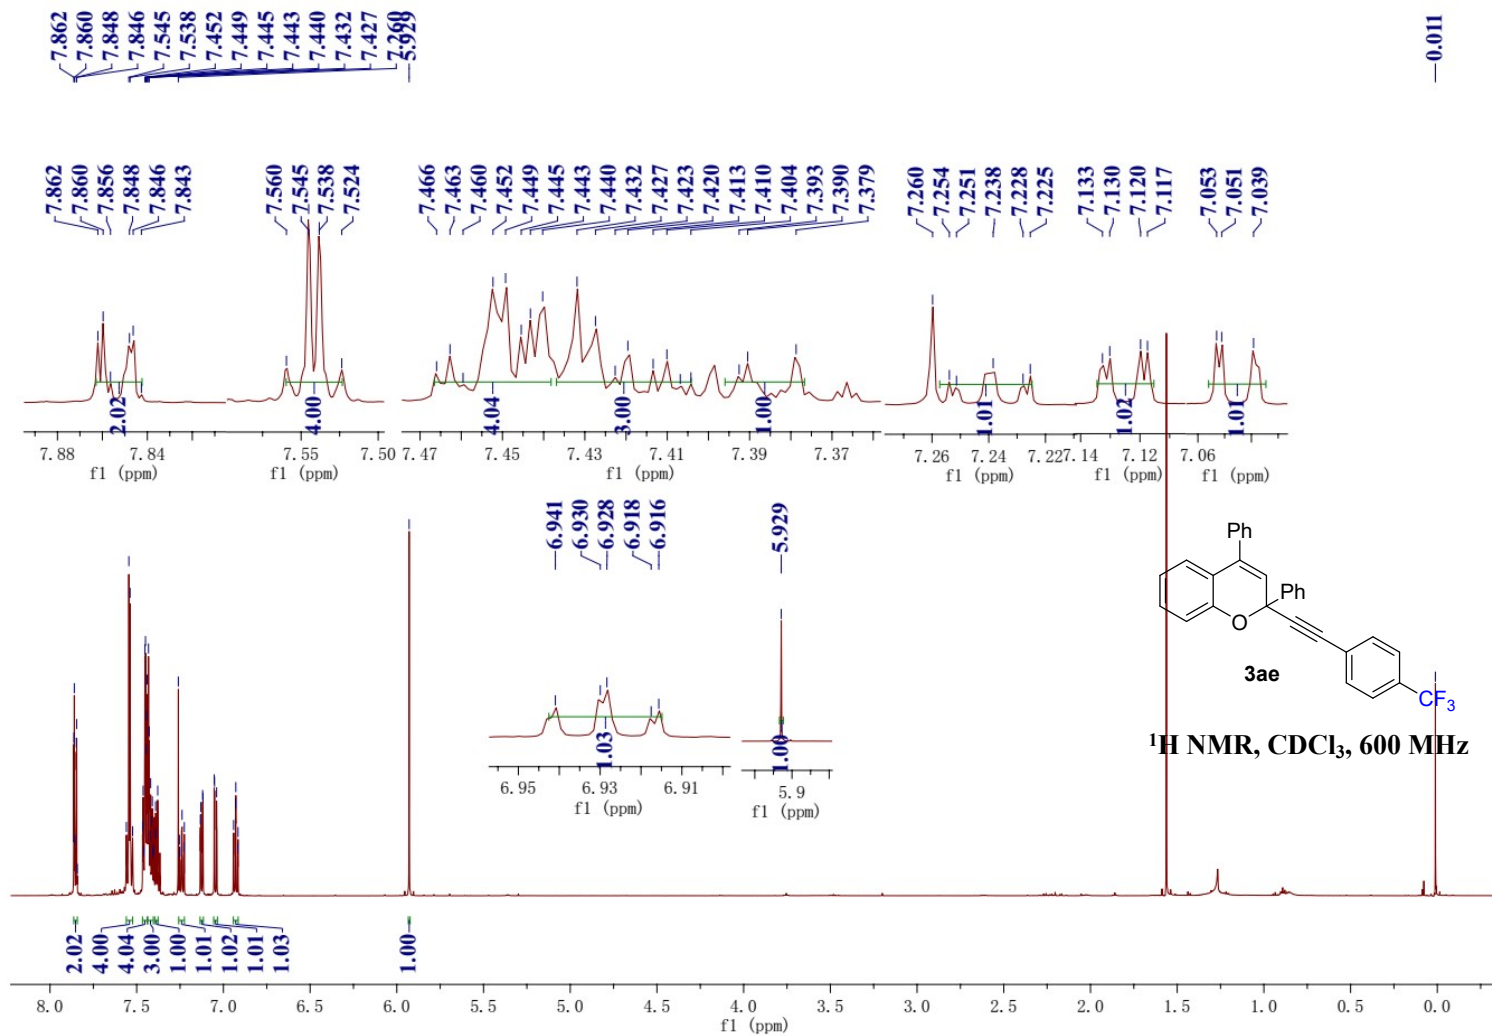

—0.011

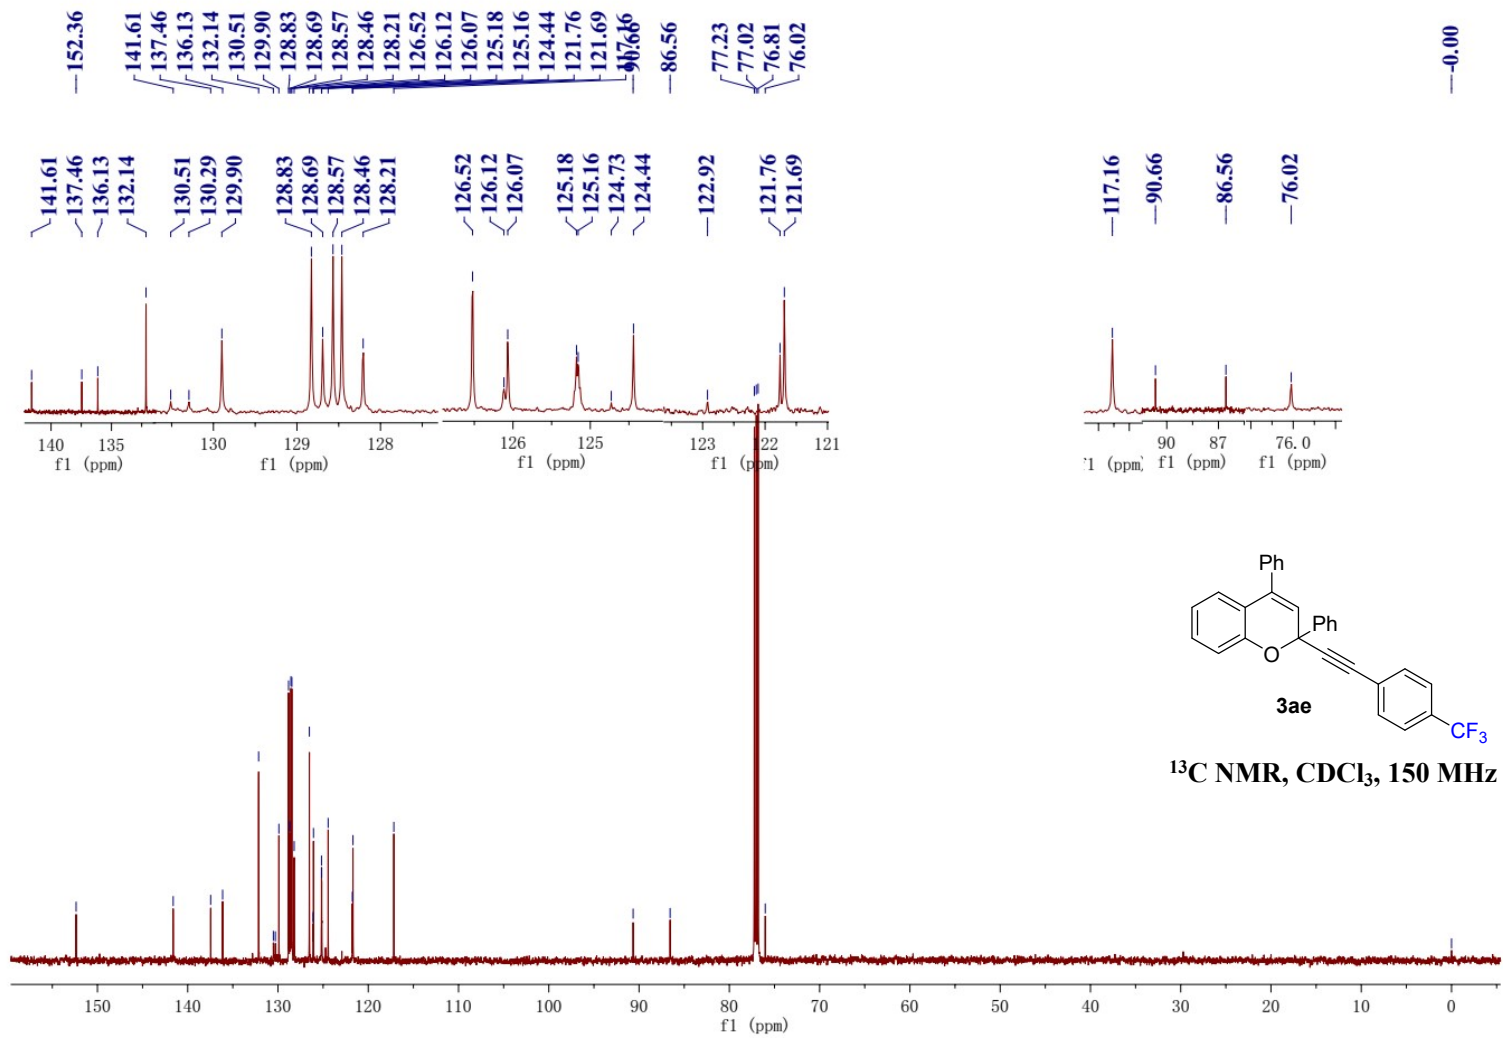

-62.76

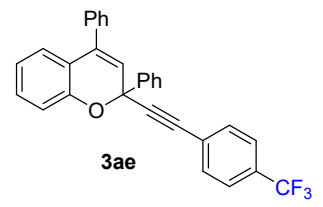

<sup>19</sup>F NMR, CDCl<sub>3</sub>, 565 MHz

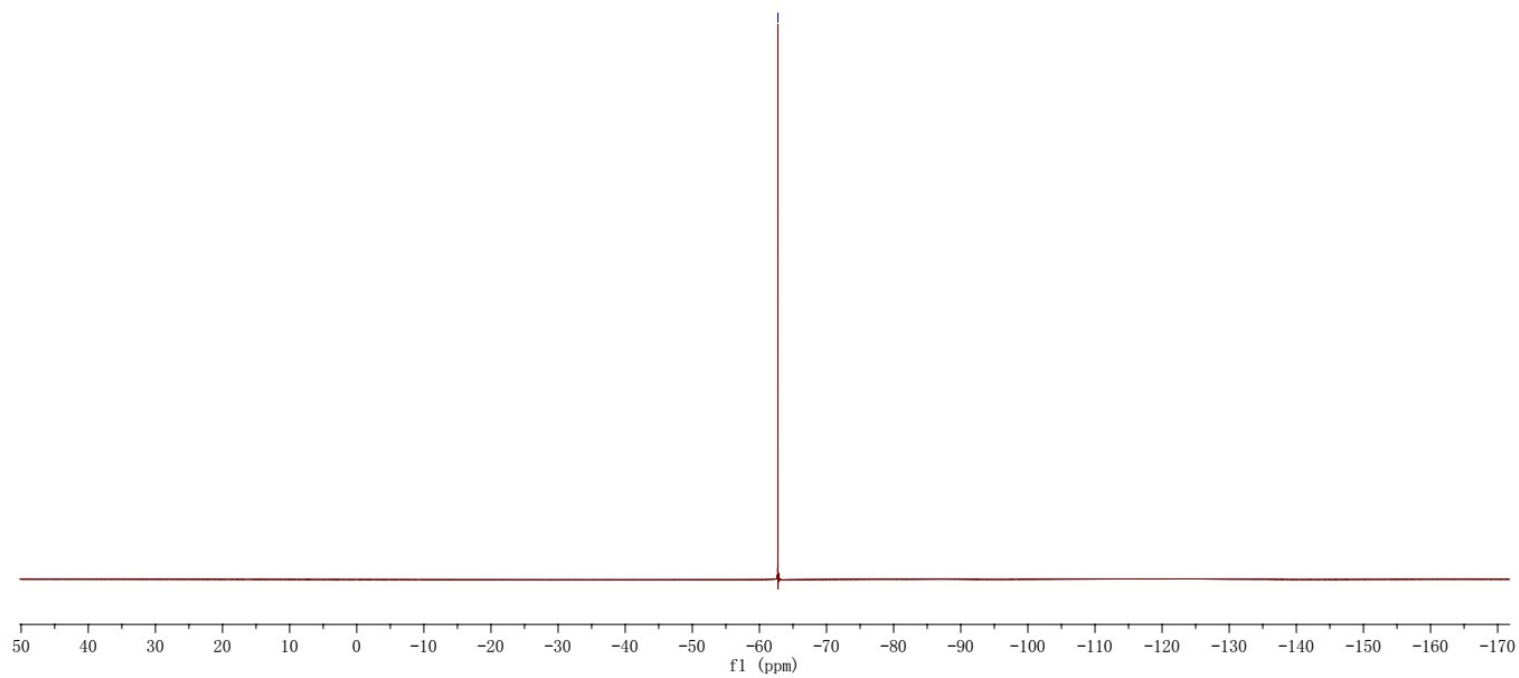

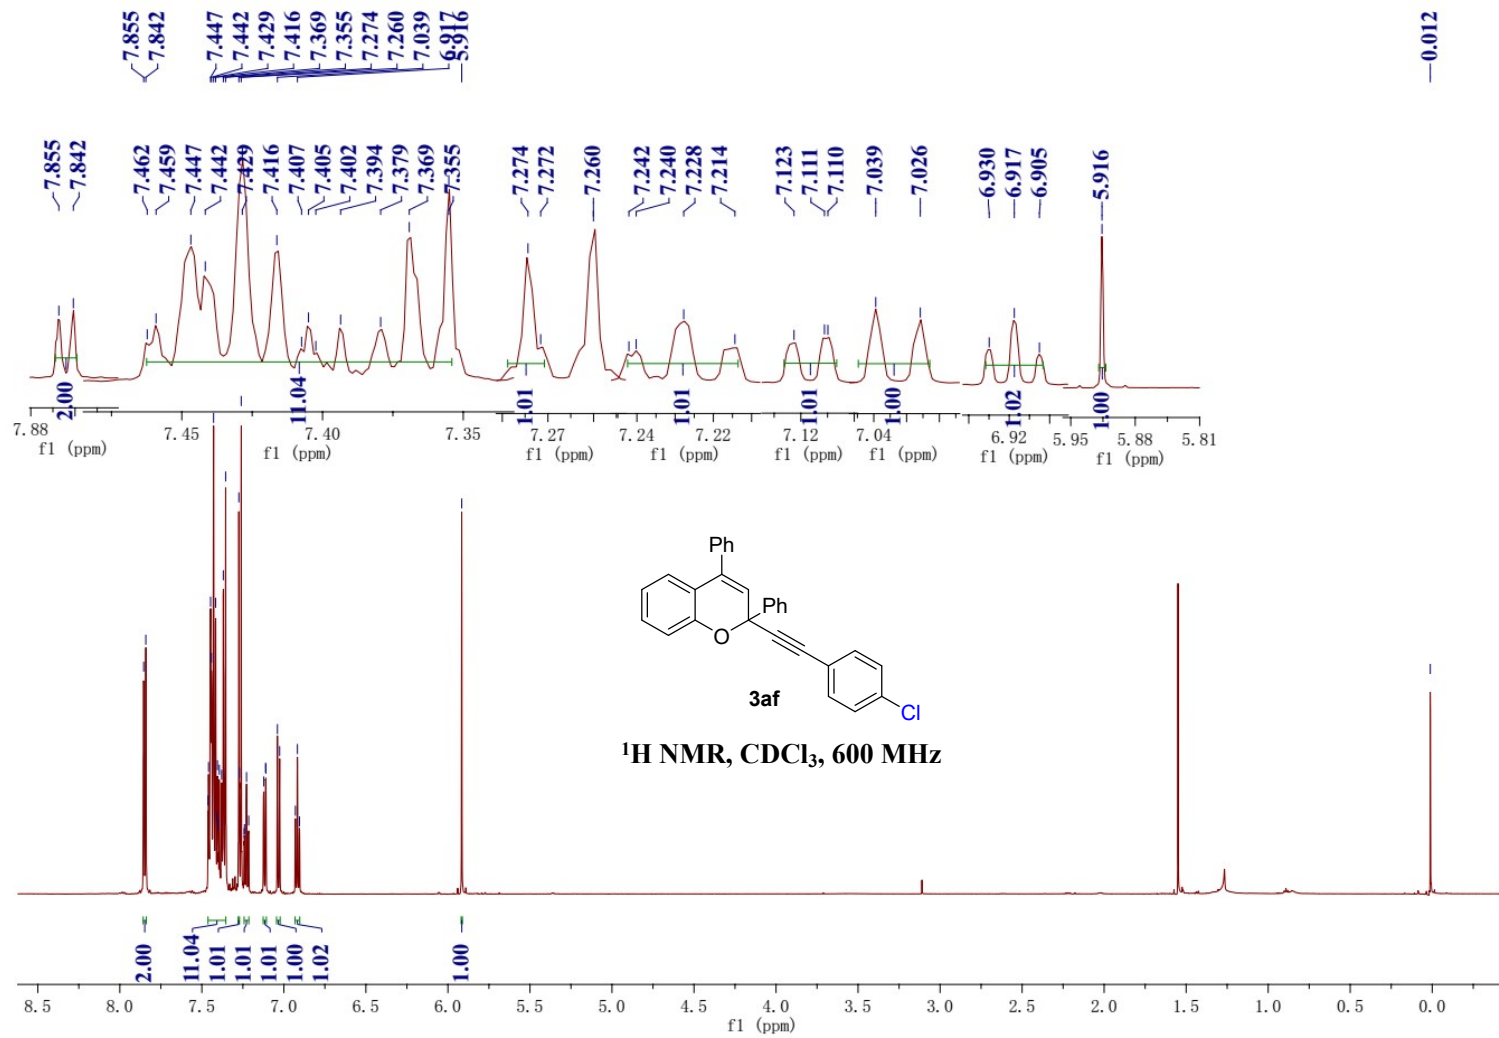

—0.012



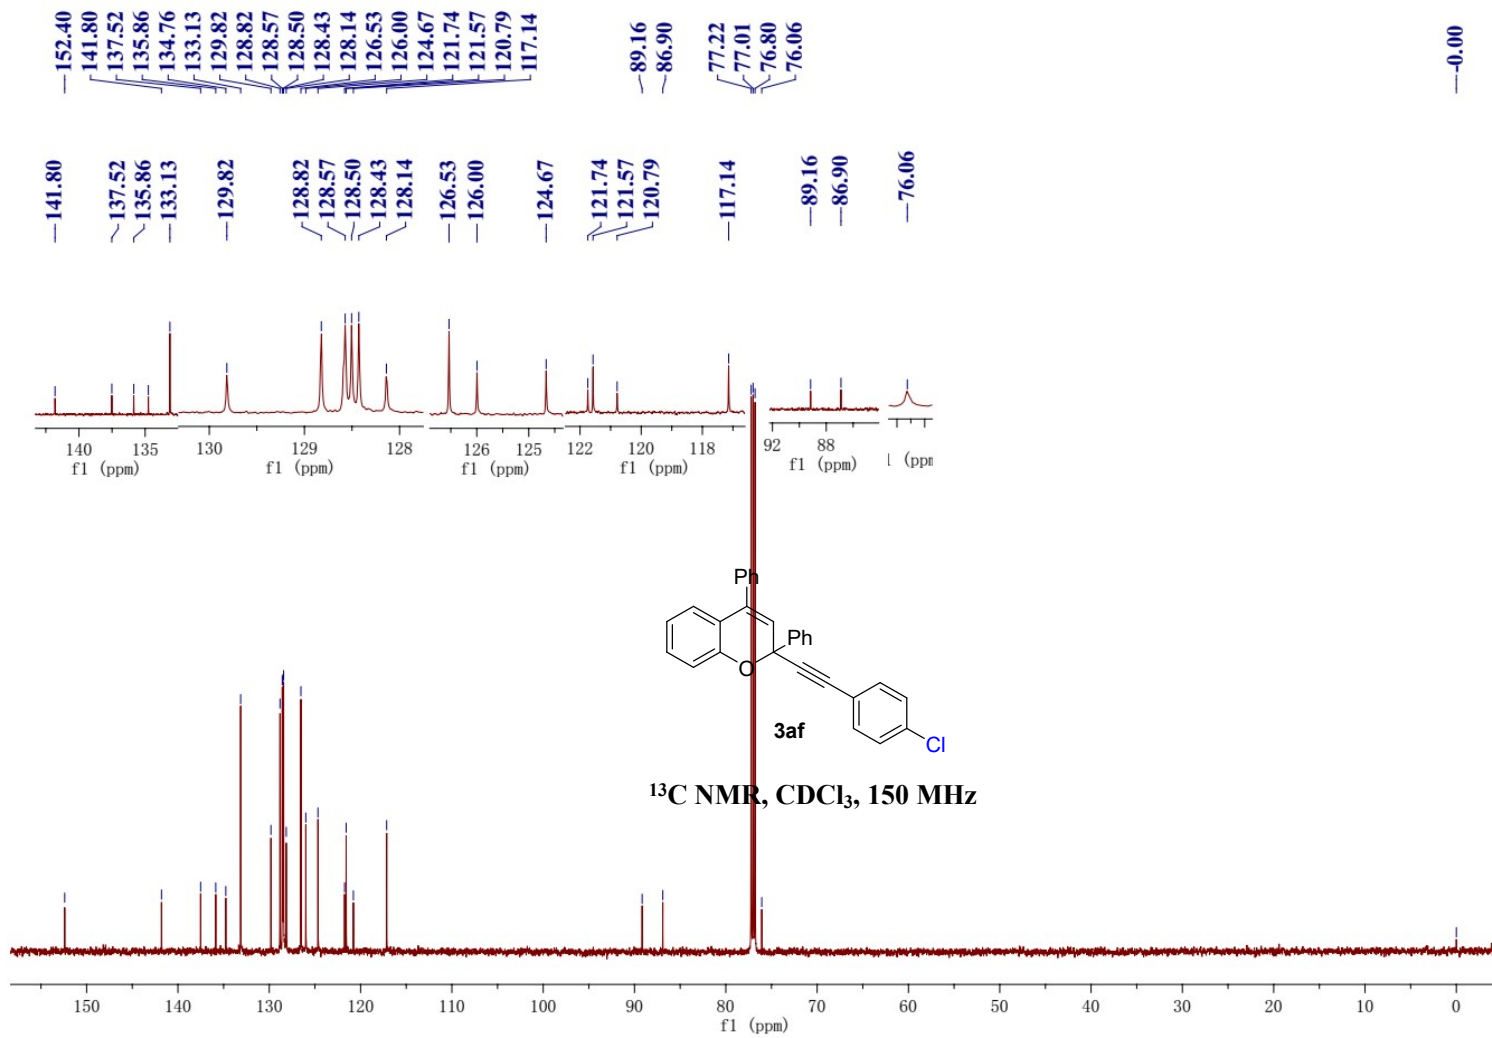

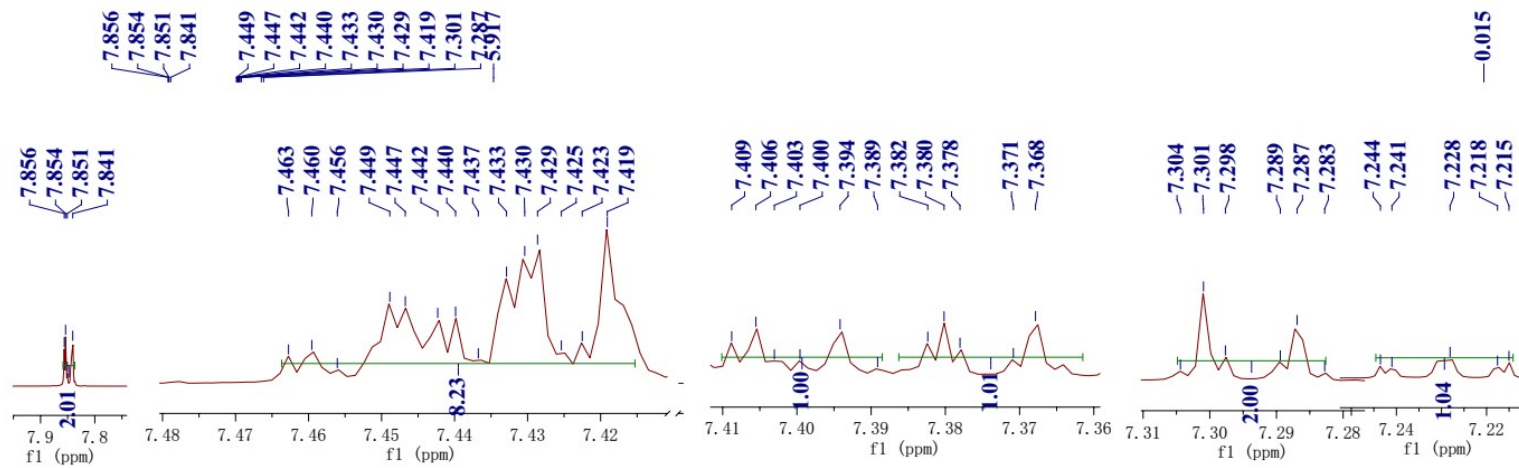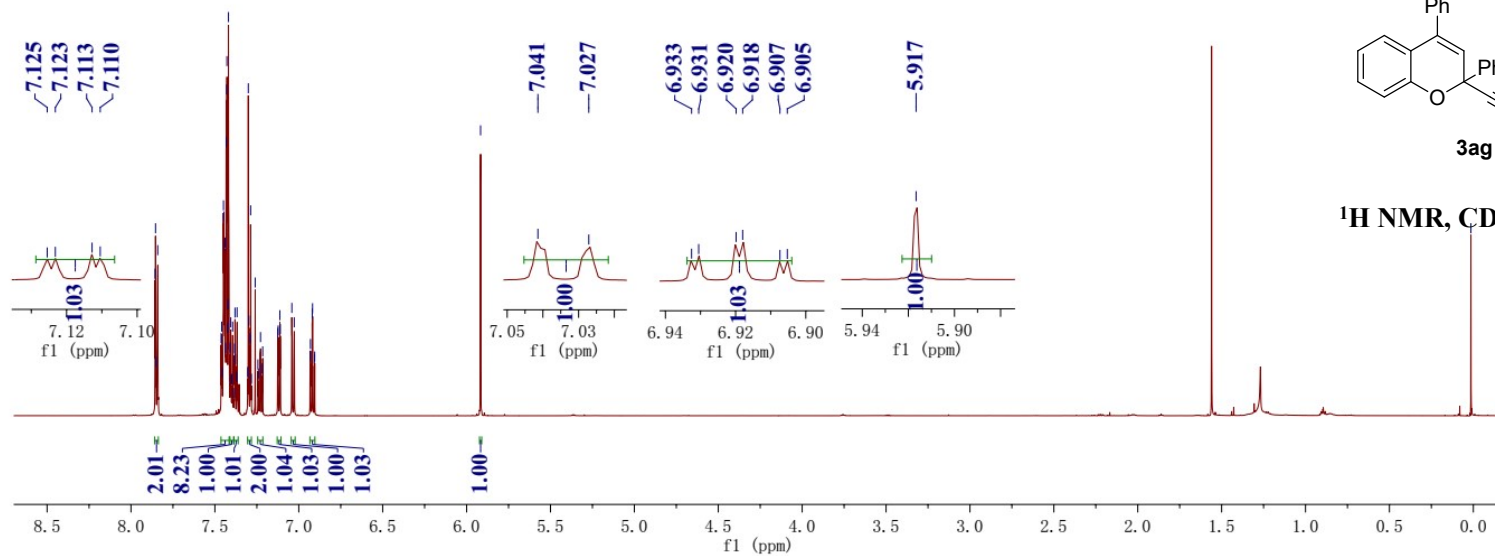

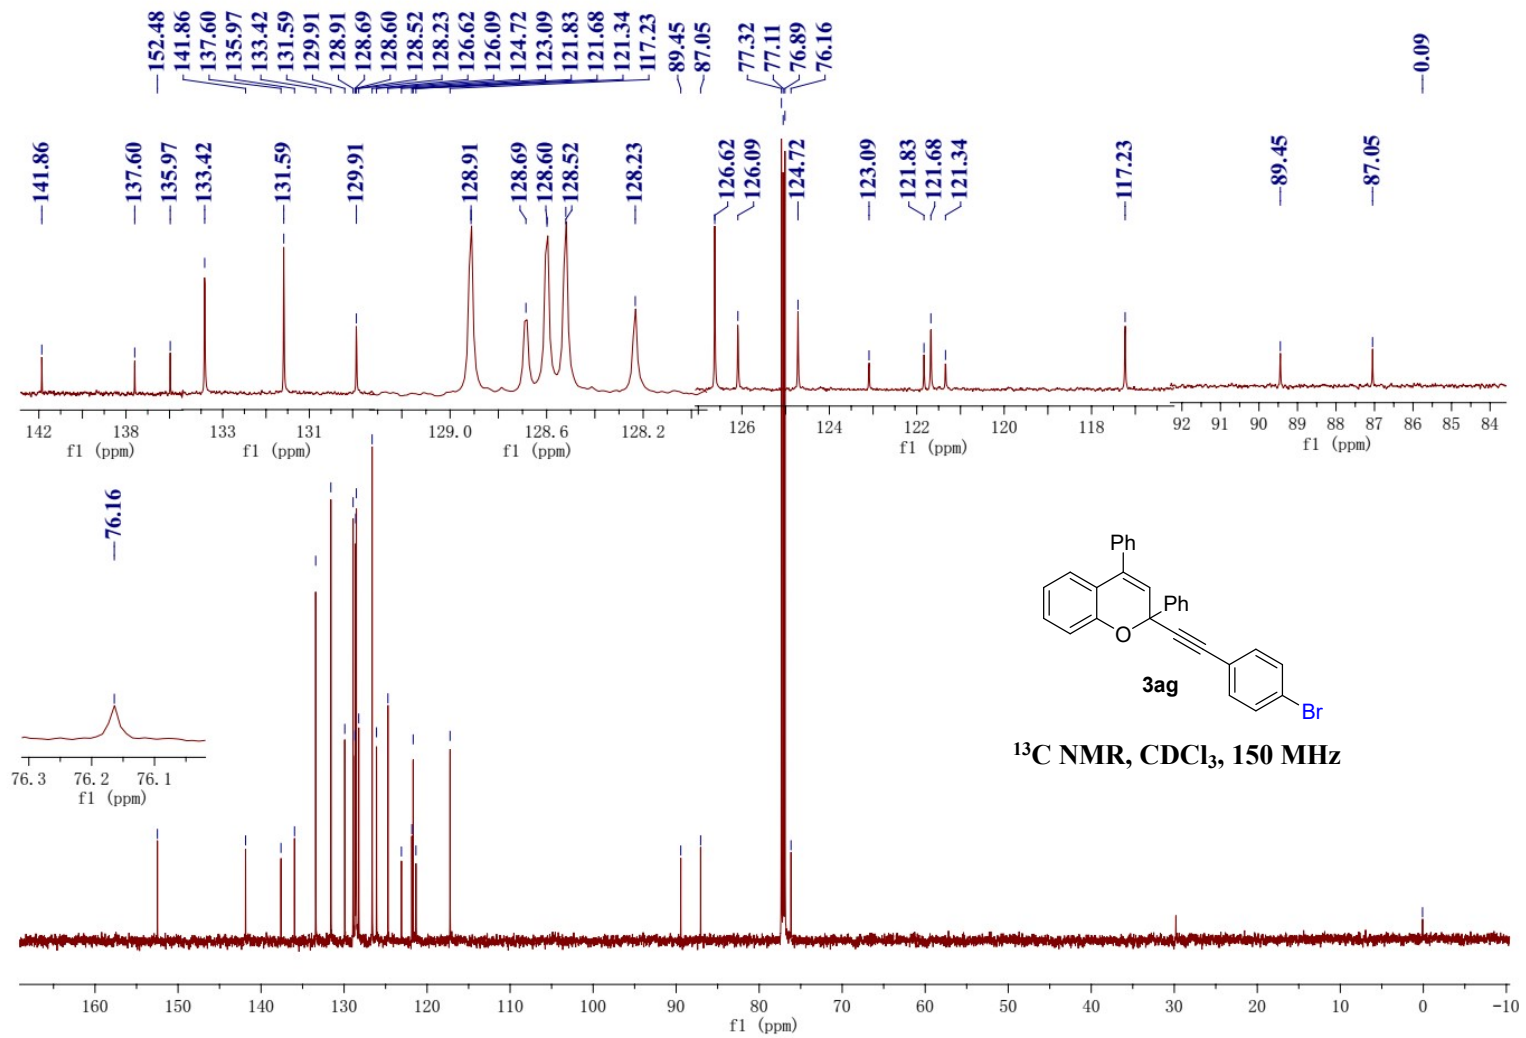

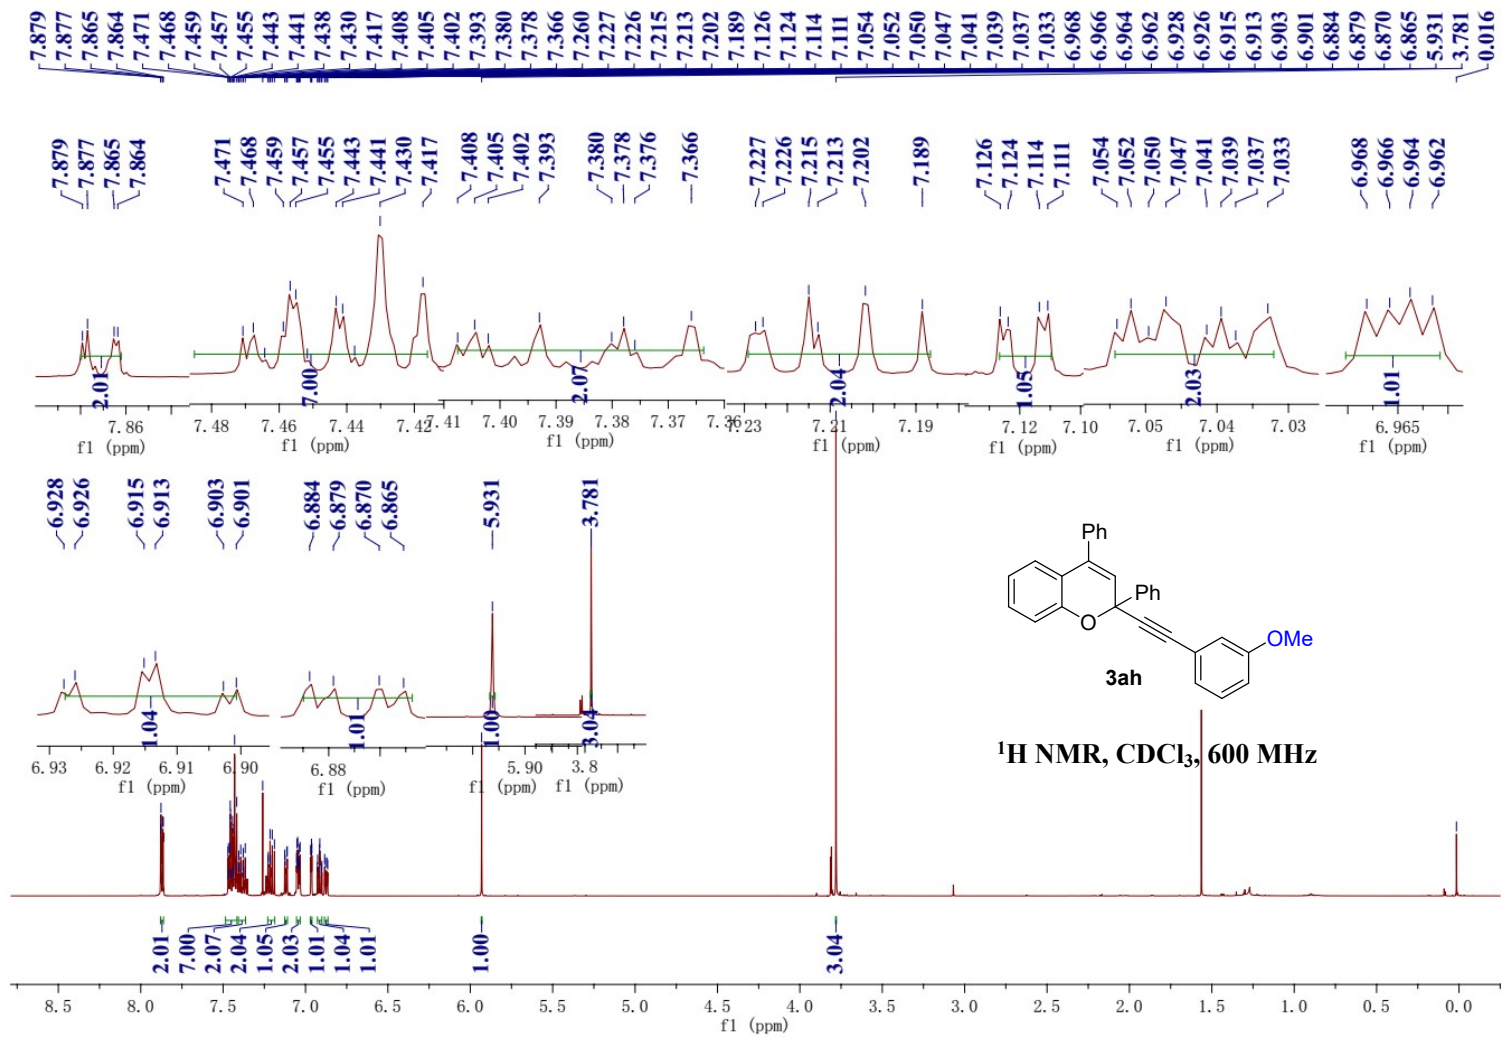

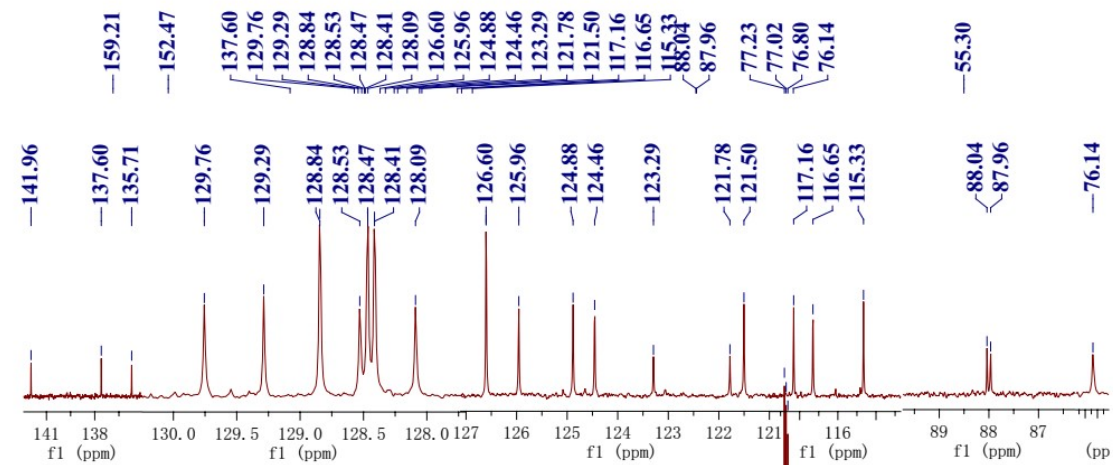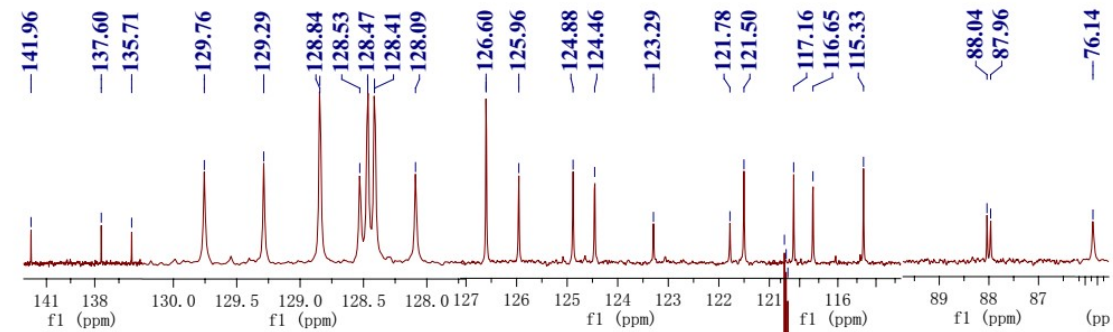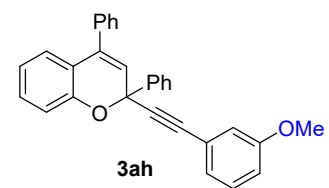

**3ah**  
<sup>13</sup>C NMR, CDCl<sub>3</sub>, 150 MHz

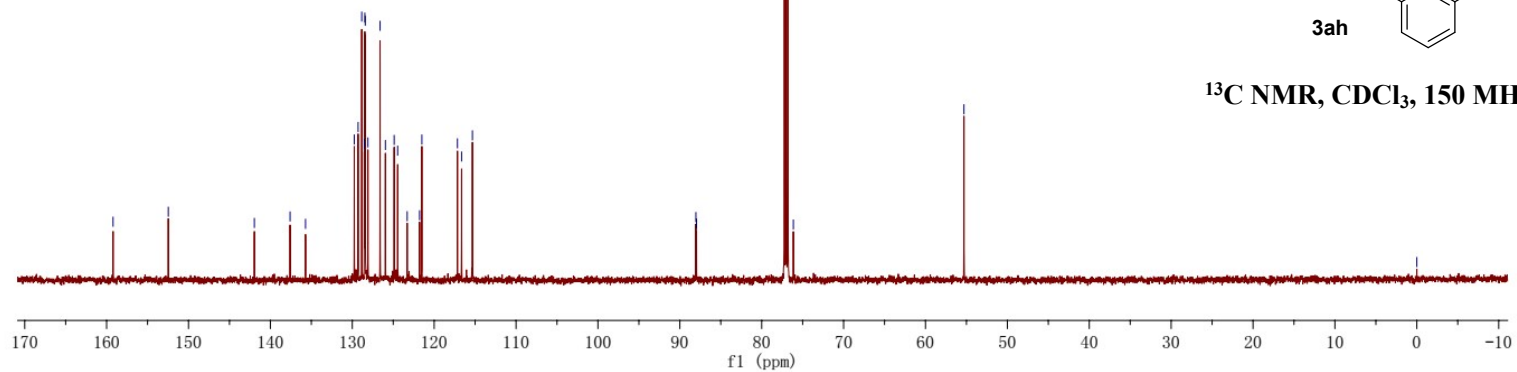

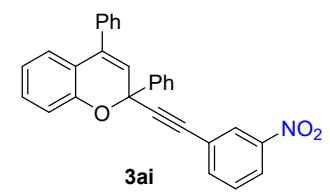

<sup>1</sup>H NMR, CDCl<sub>3</sub>, 600 MHz

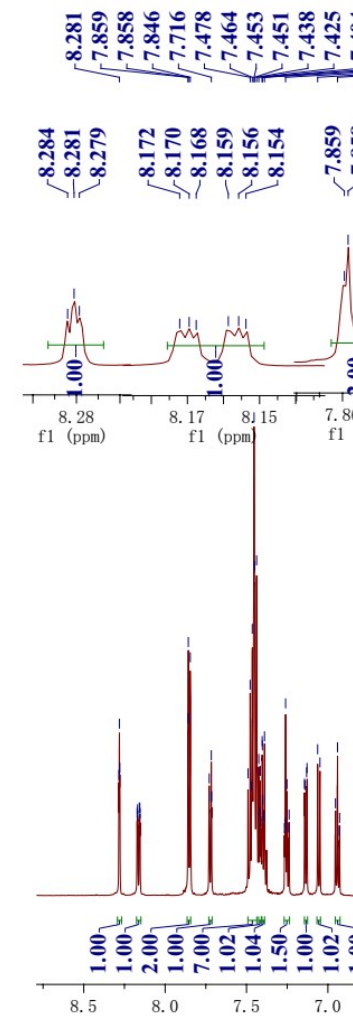

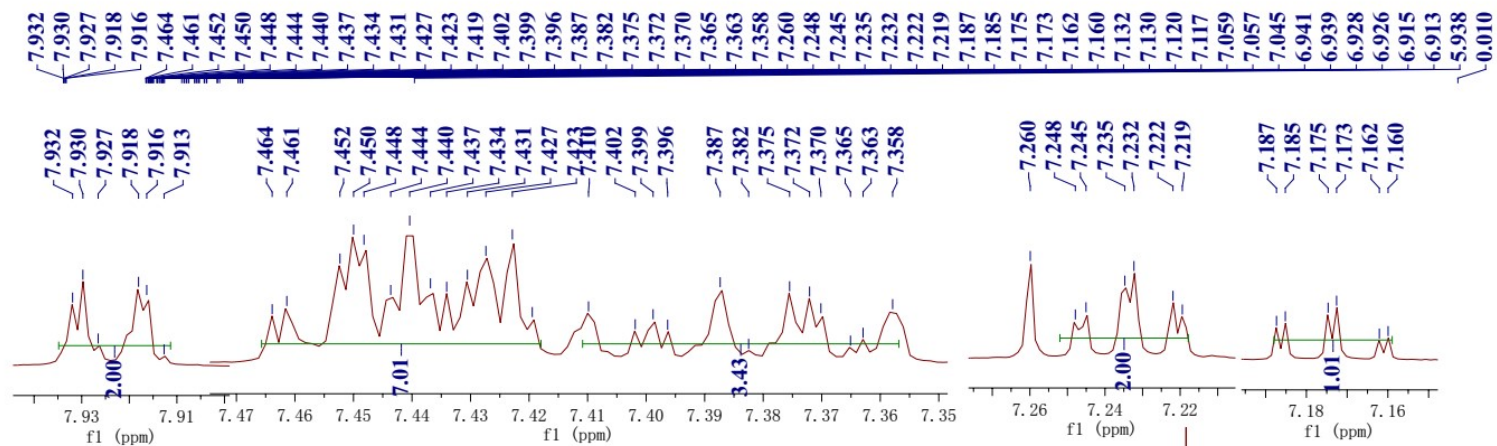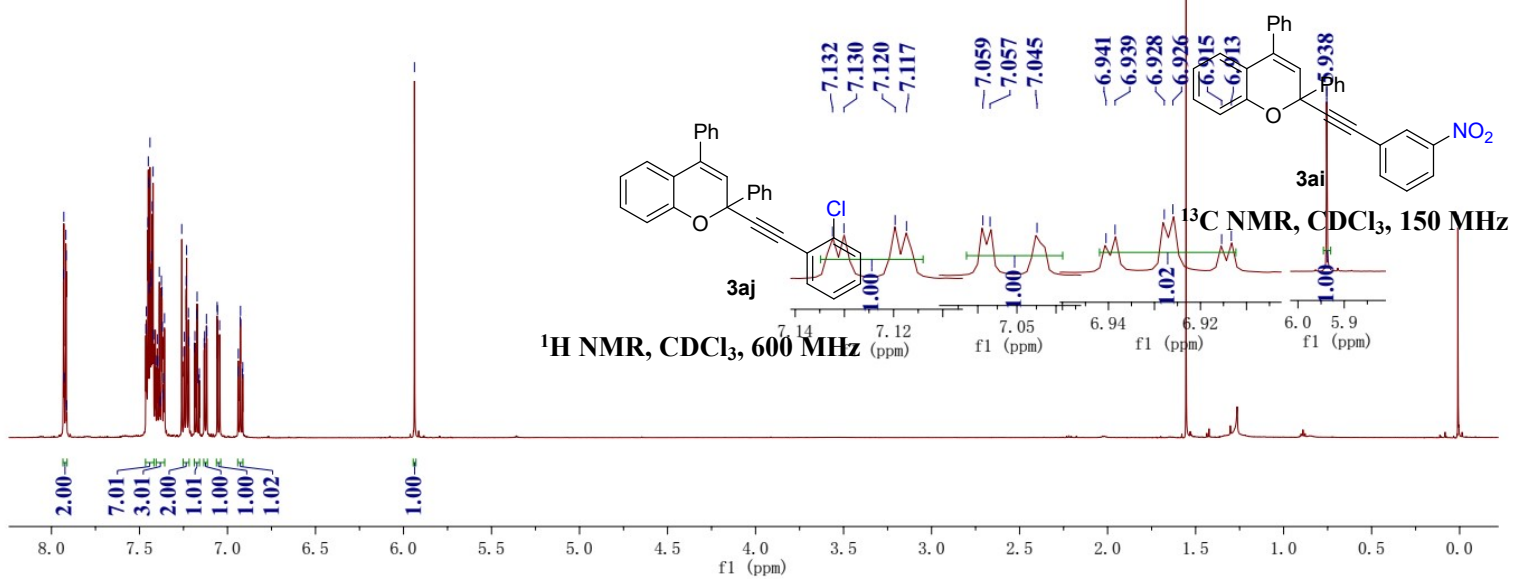



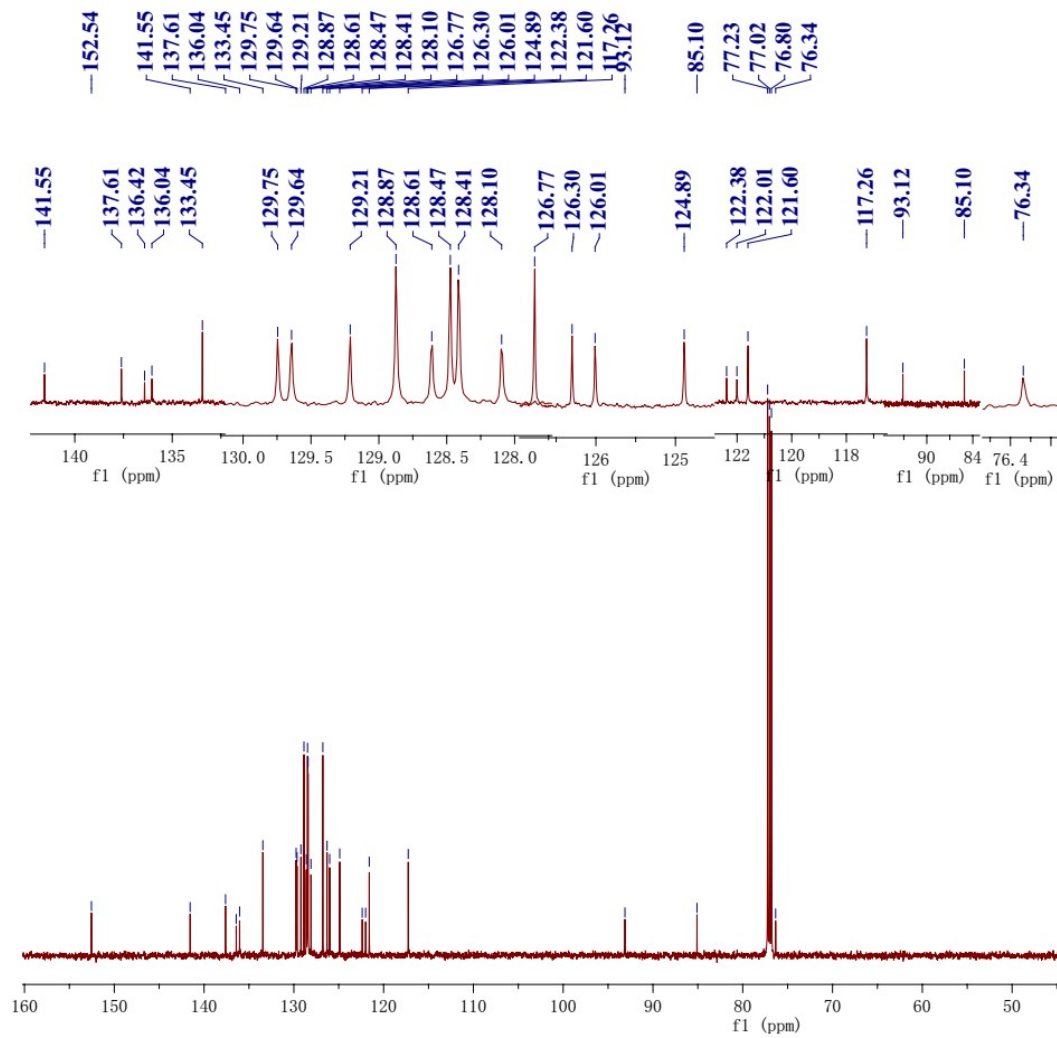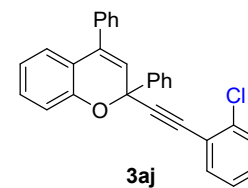

<sup>13</sup>C NMR, CDCl<sub>3</sub>, 150 MHz



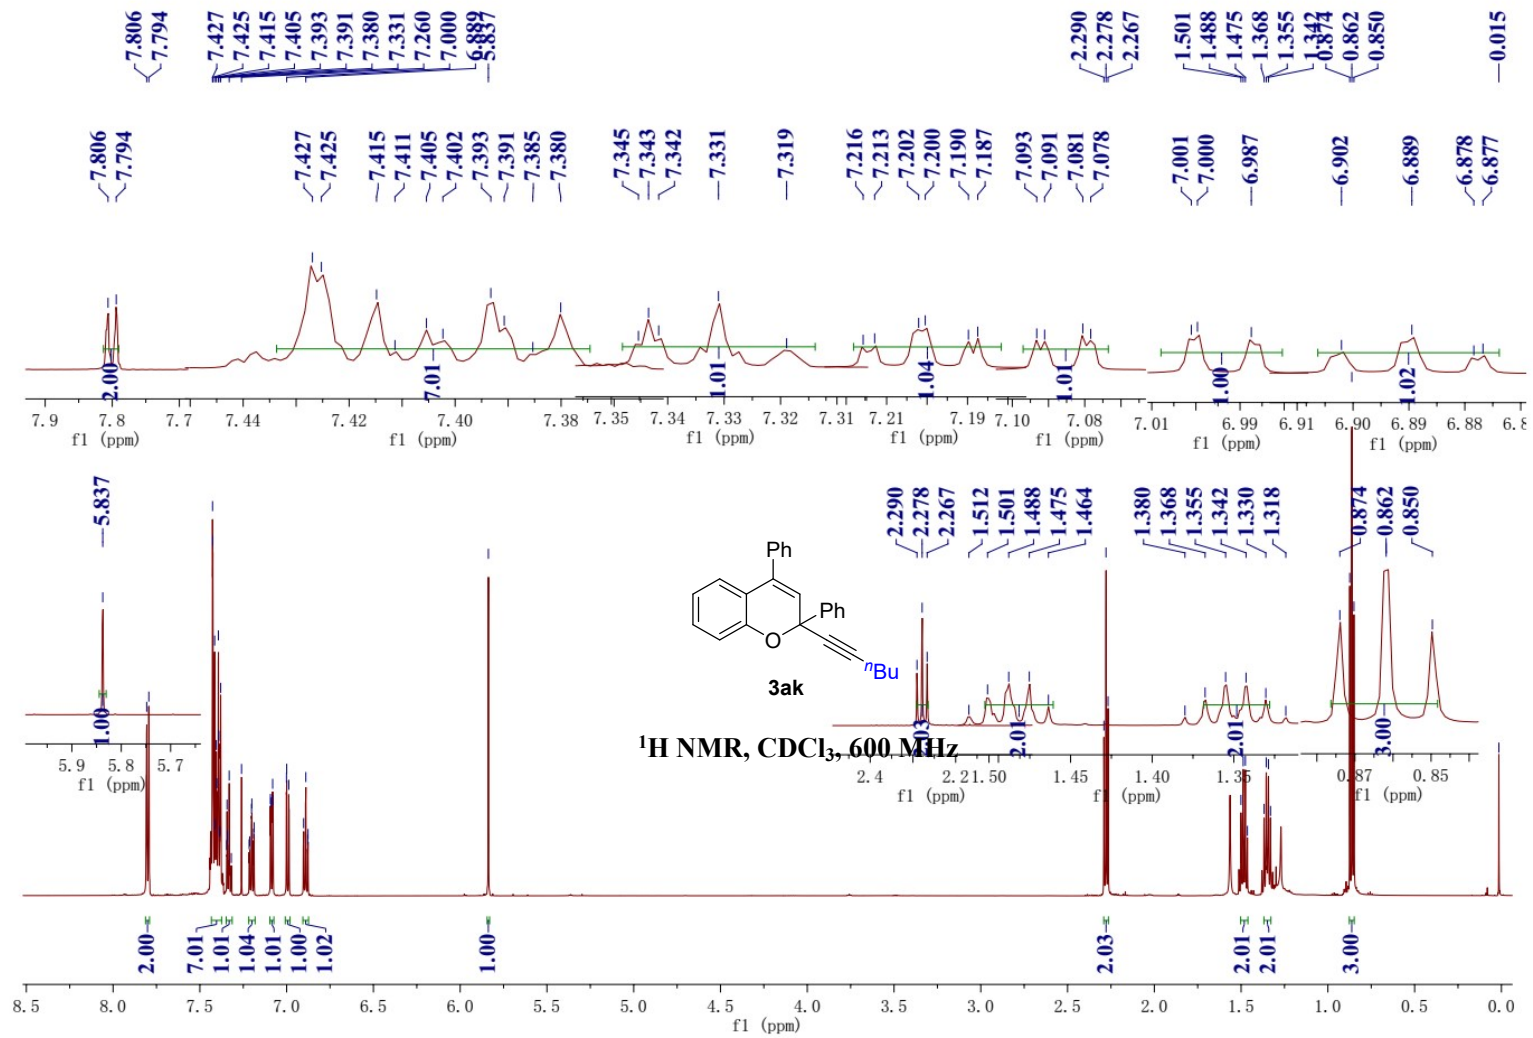

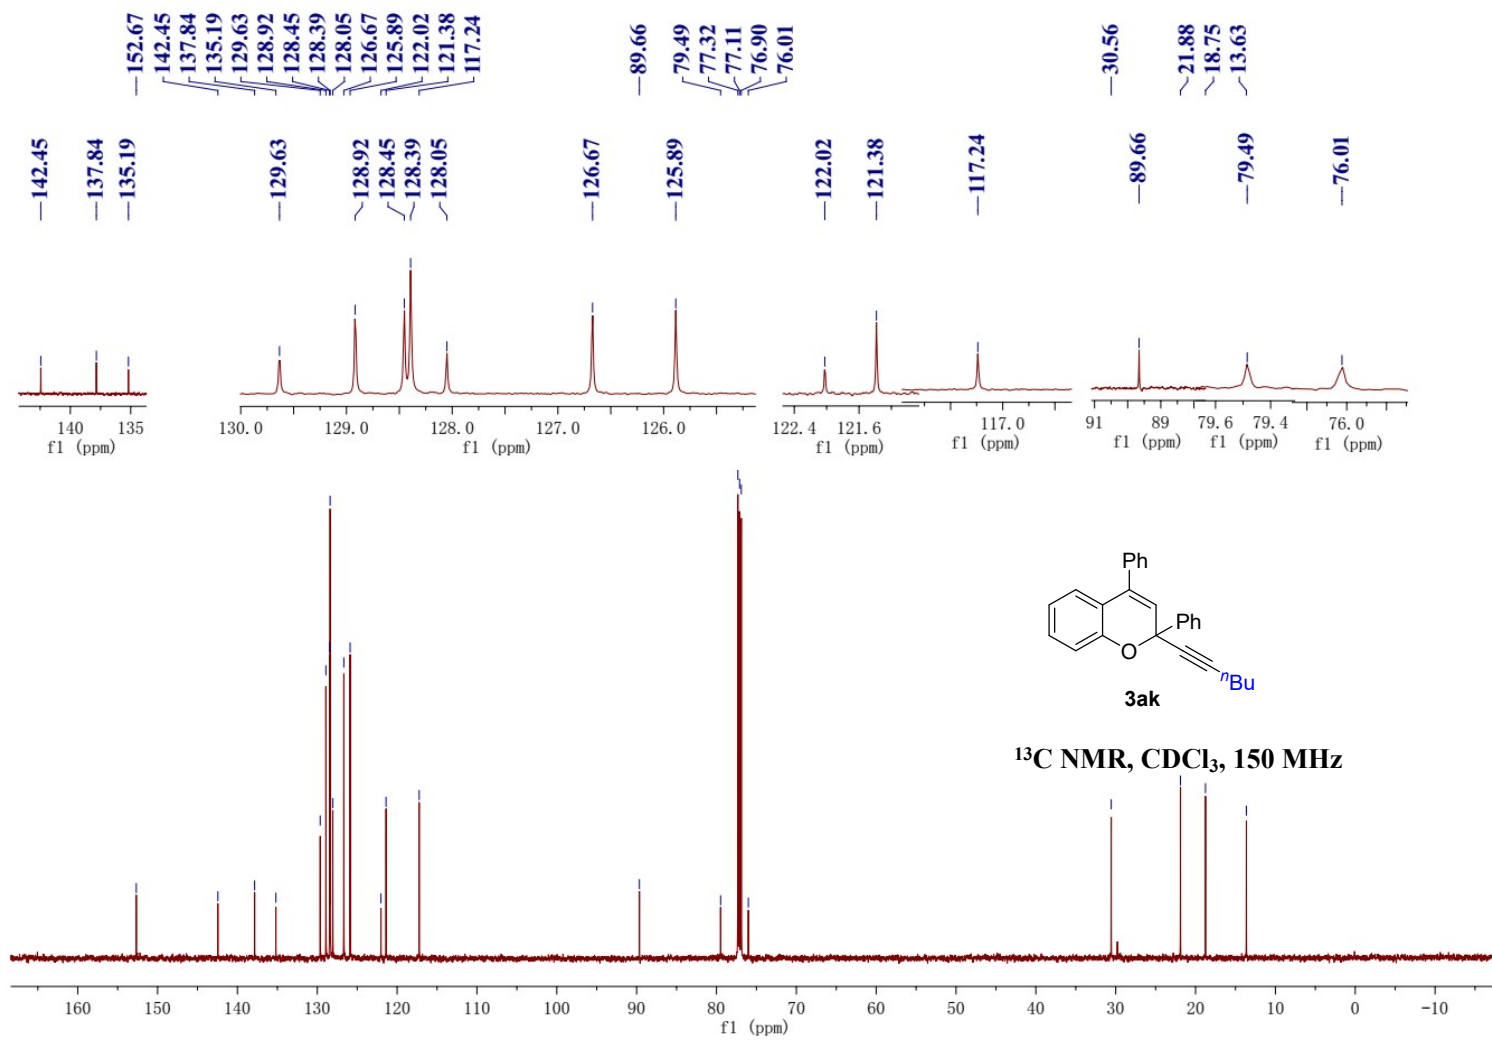

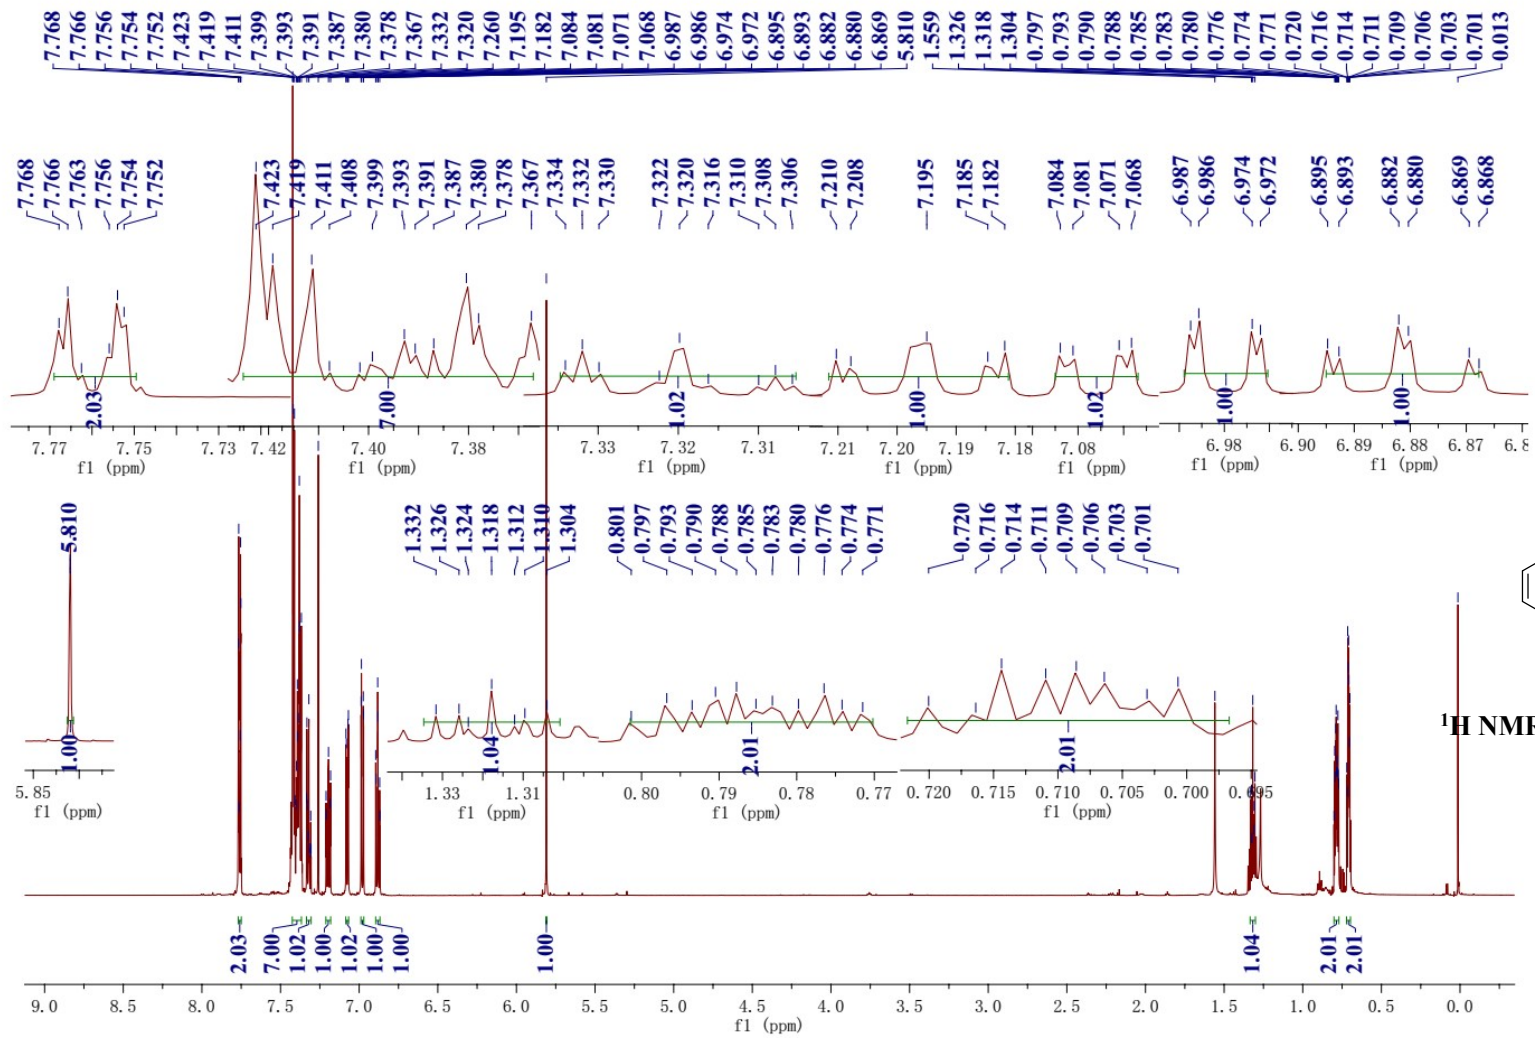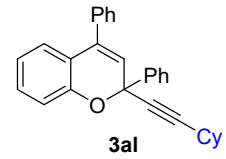

<sup>1</sup>H NMR, CDCl<sub>3</sub>, 600 MHz

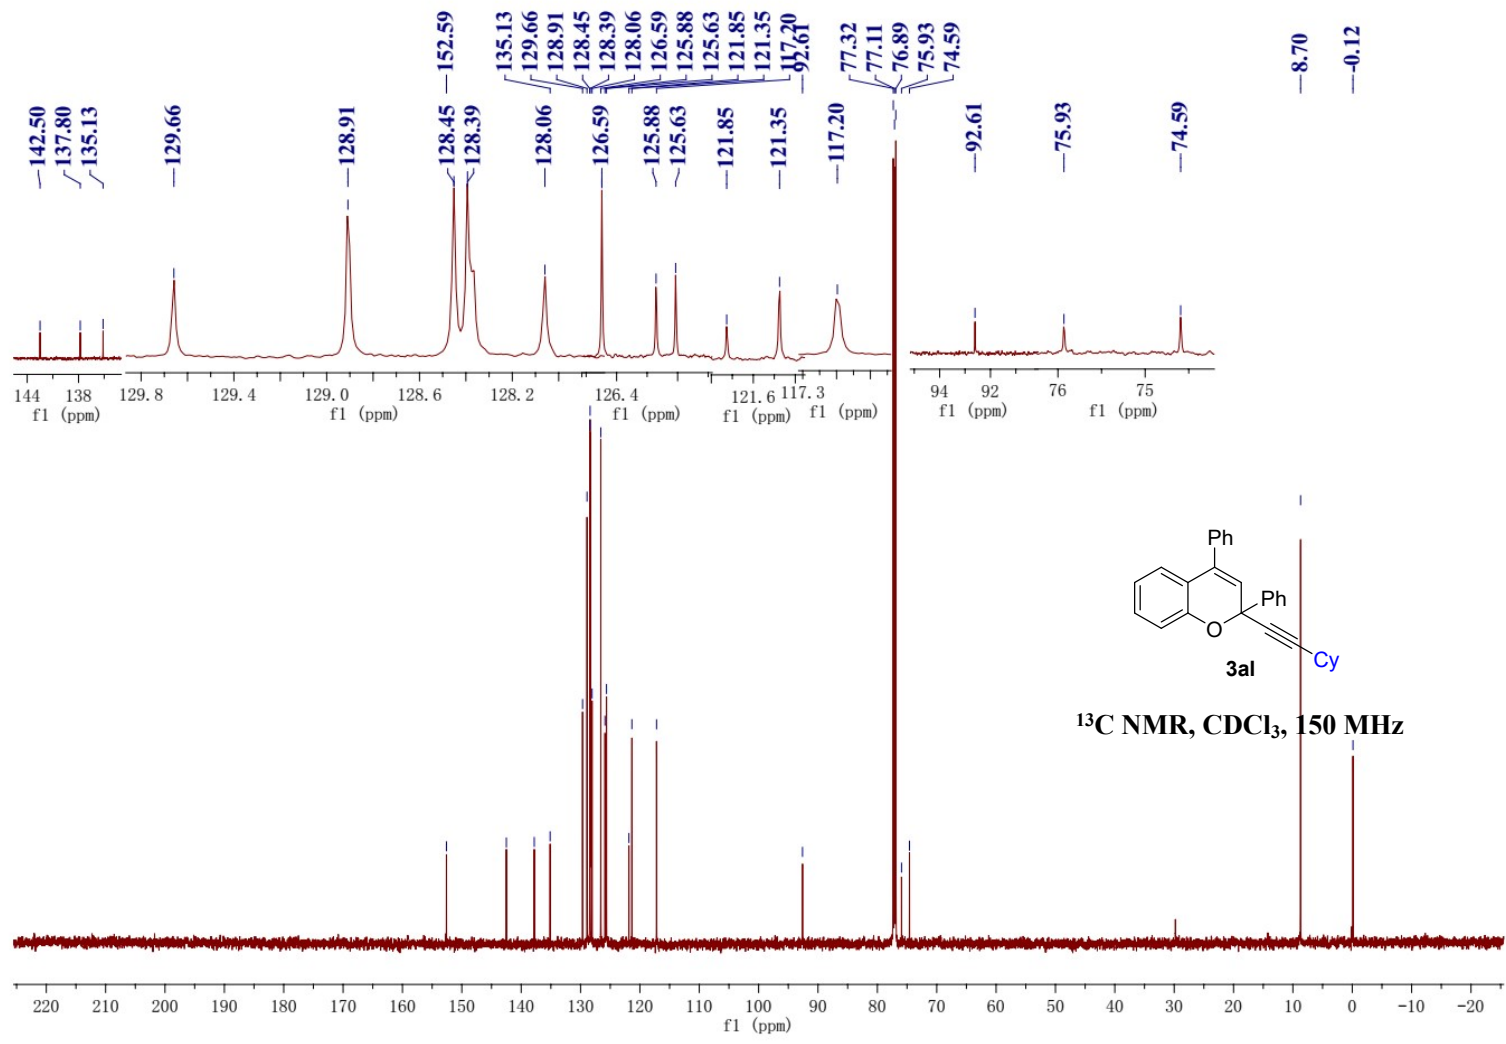

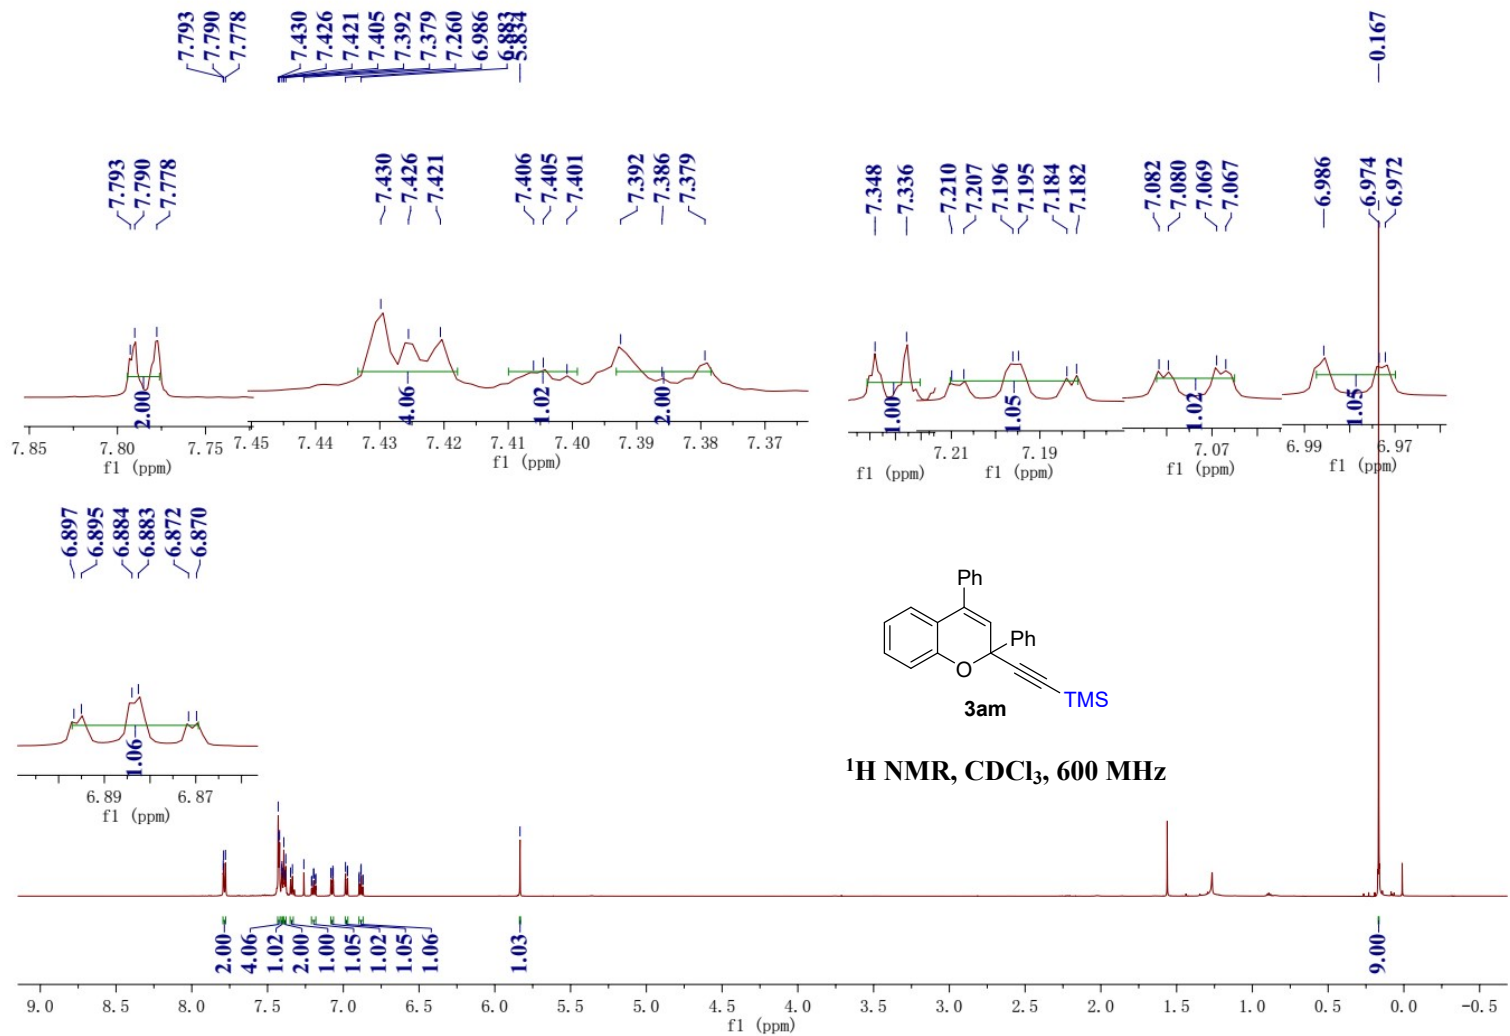

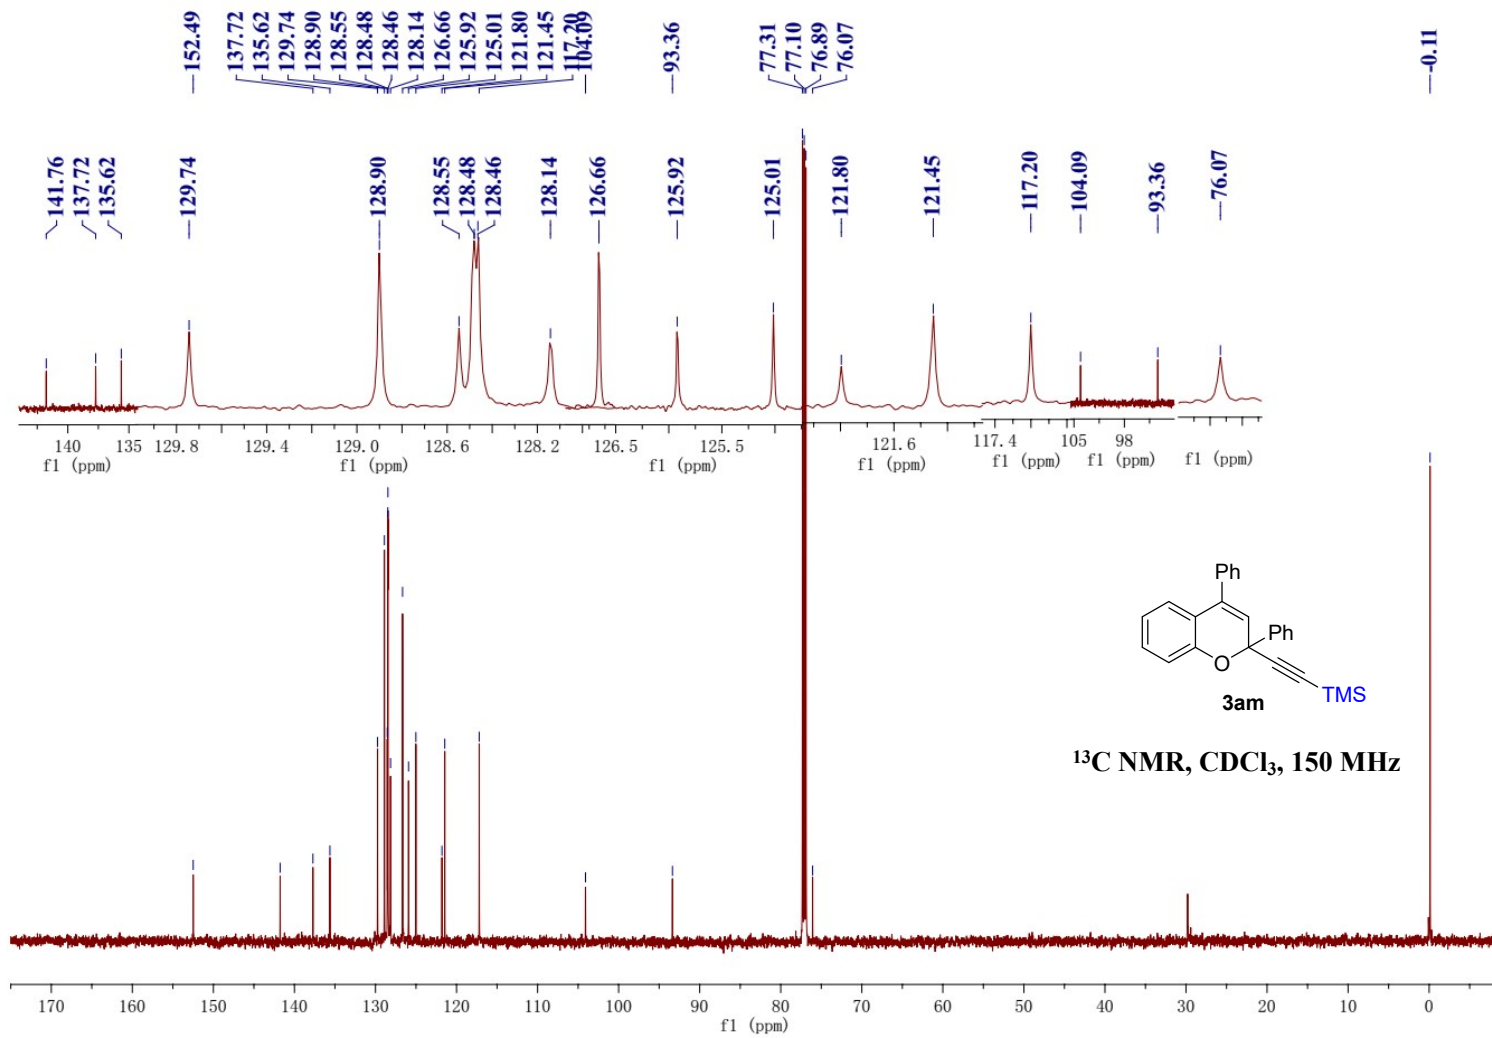

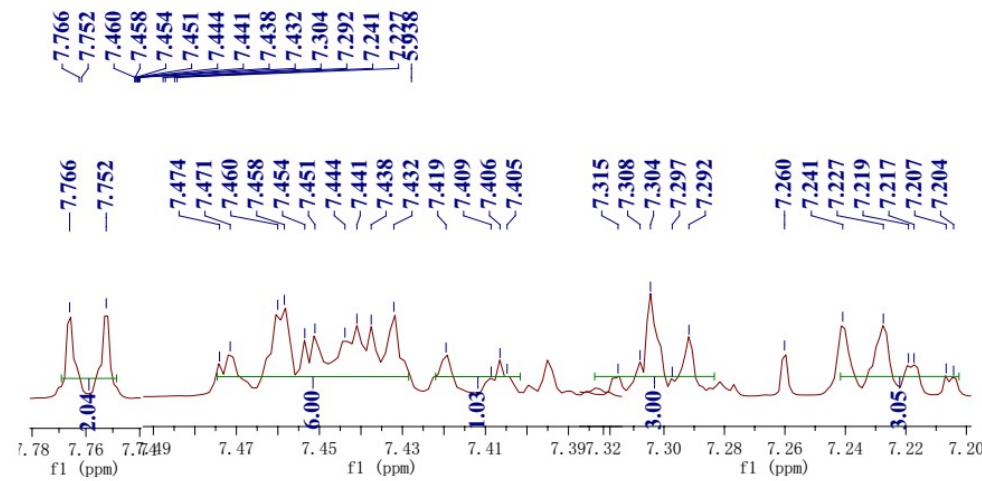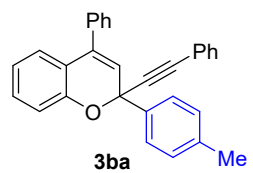

$^1\text{H NMR}$ ,  $\text{CDCl}_3$ , 600 MHz

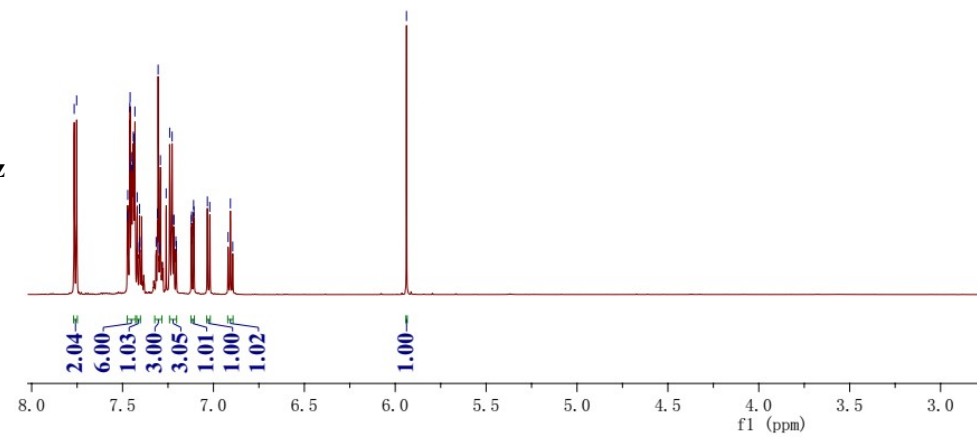



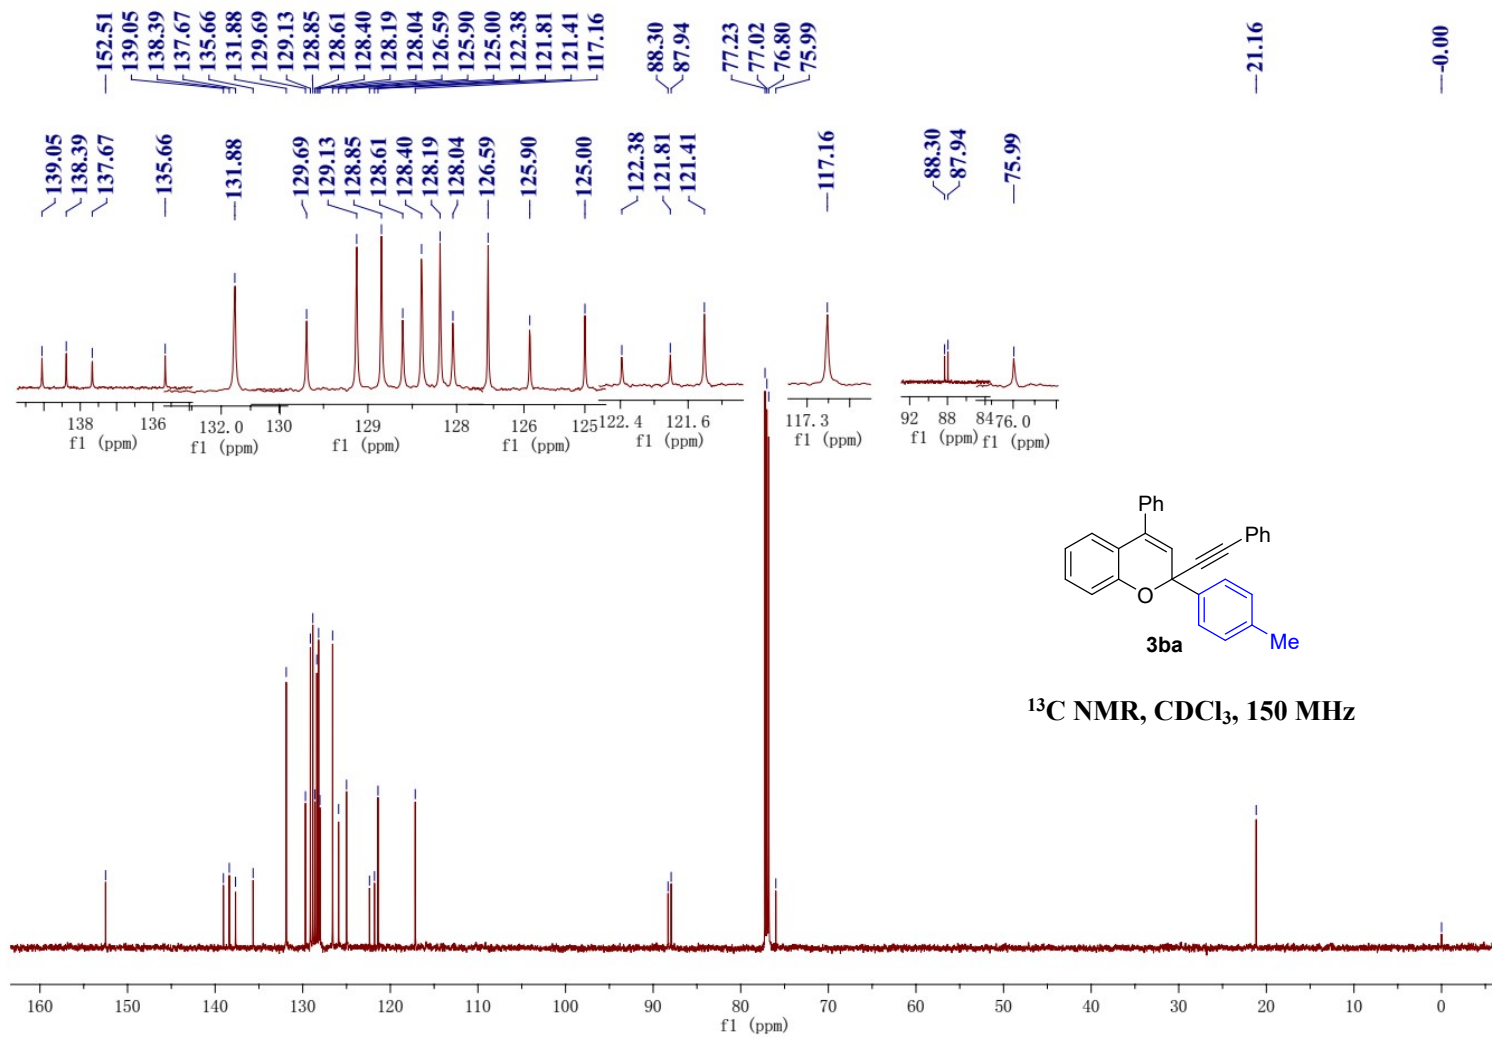



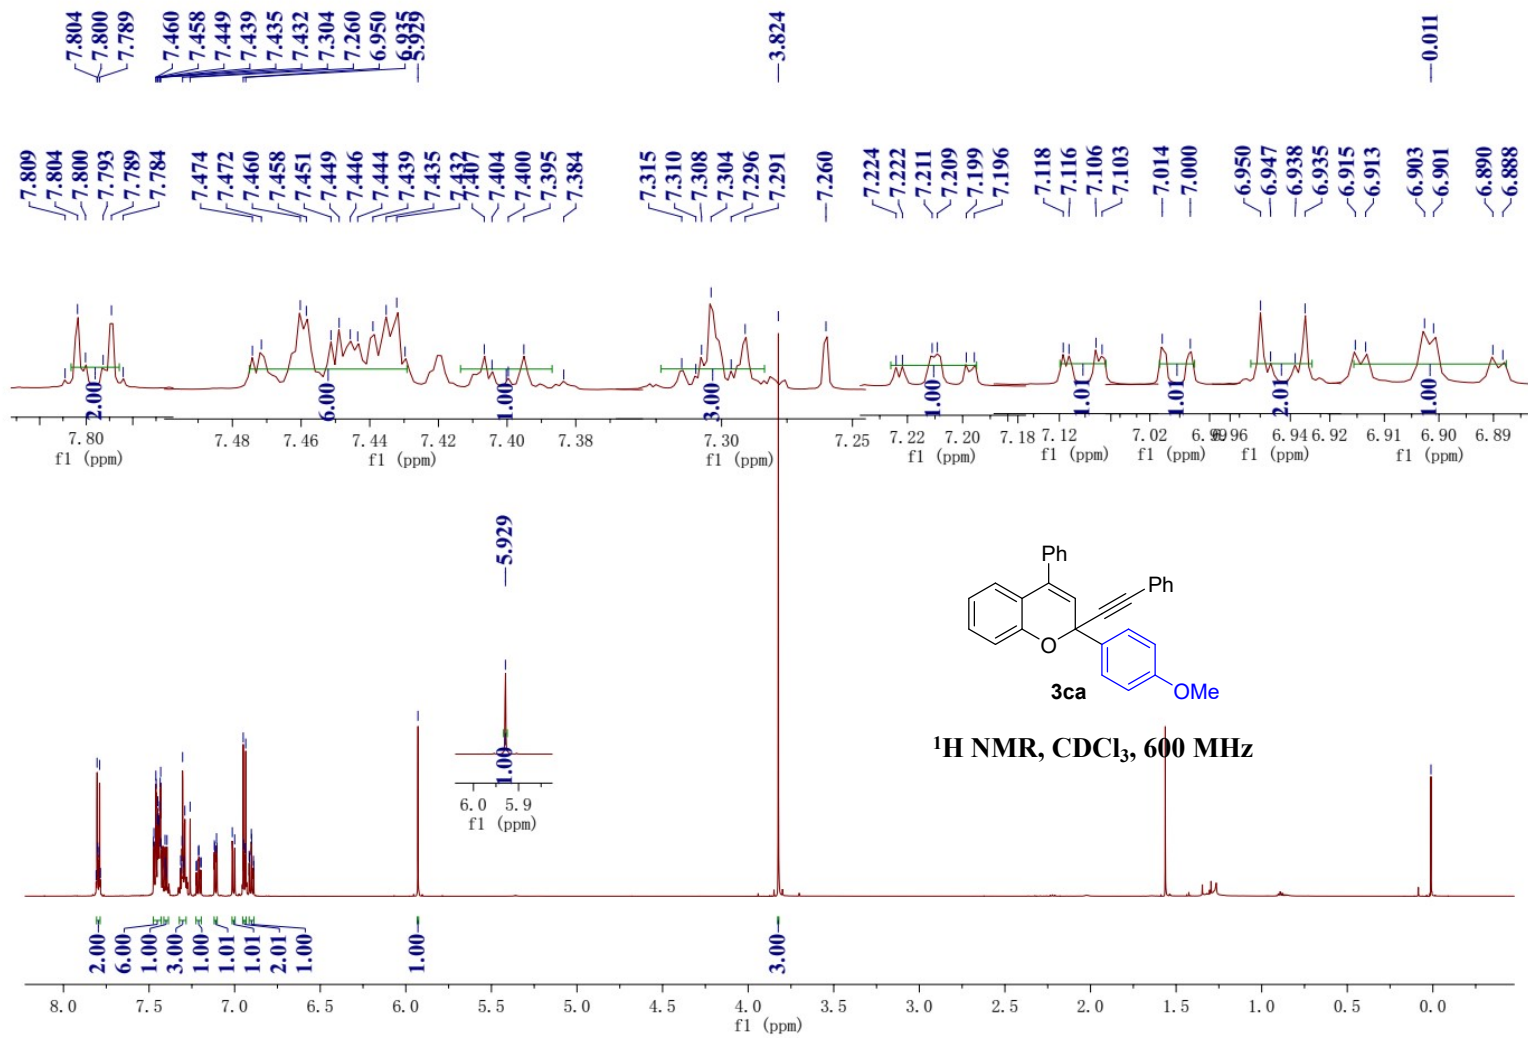

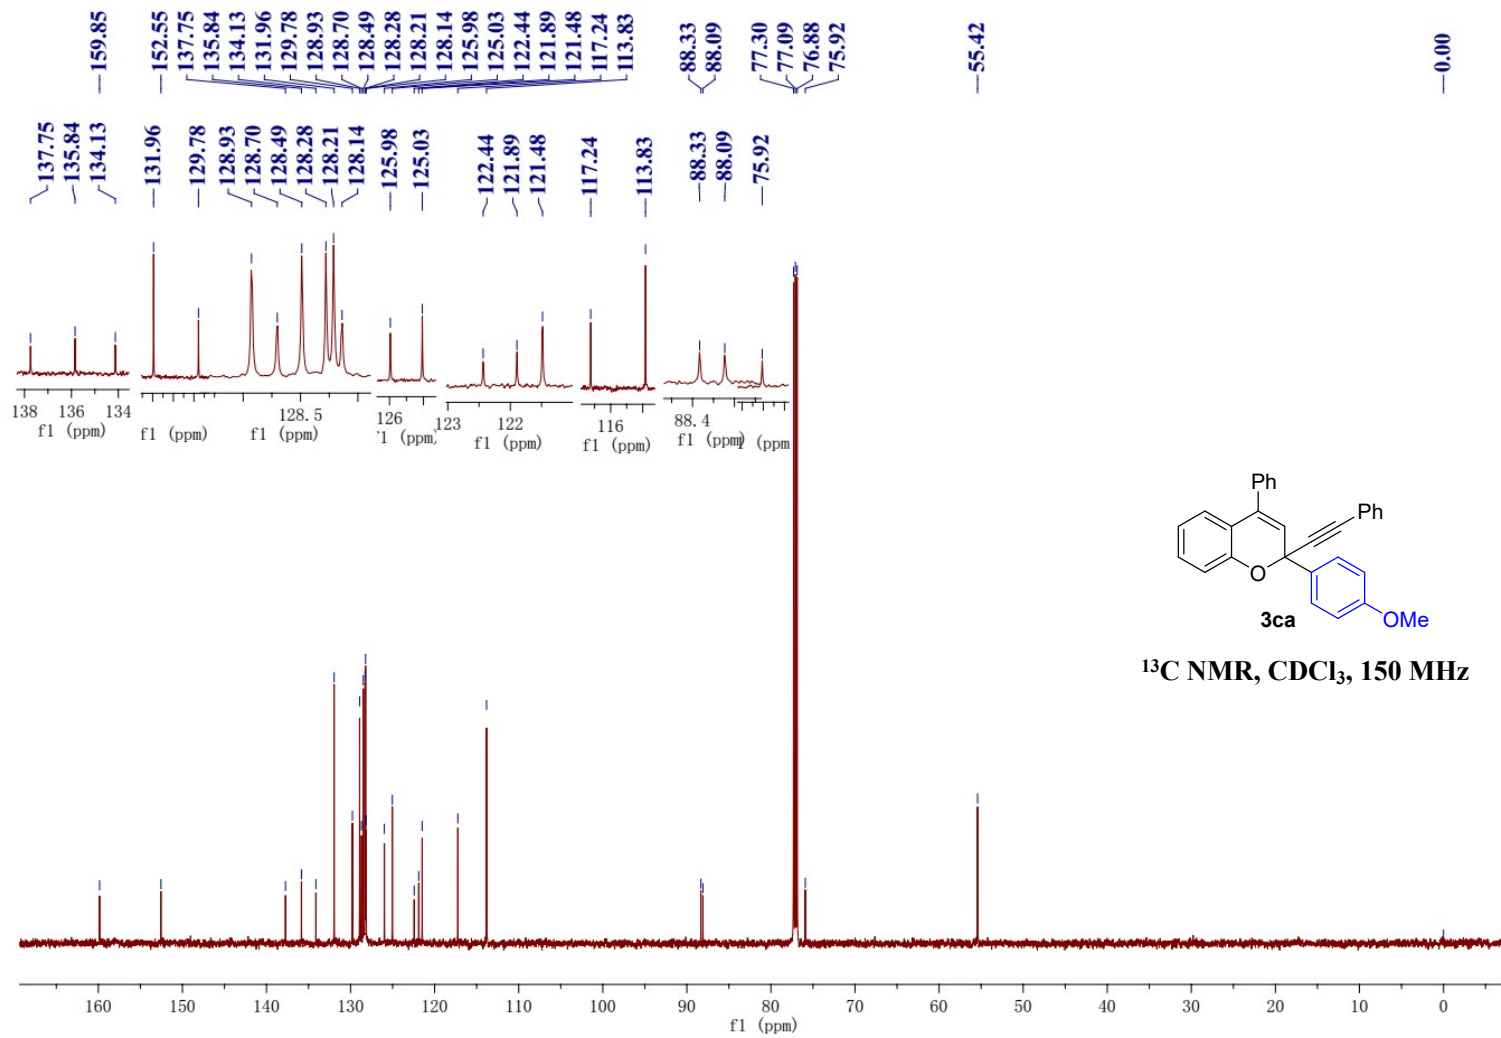

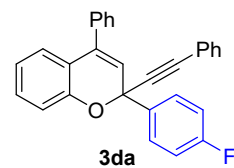

<sup>1</sup>H NMR, CDCl<sub>3</sub>, 600 MHz

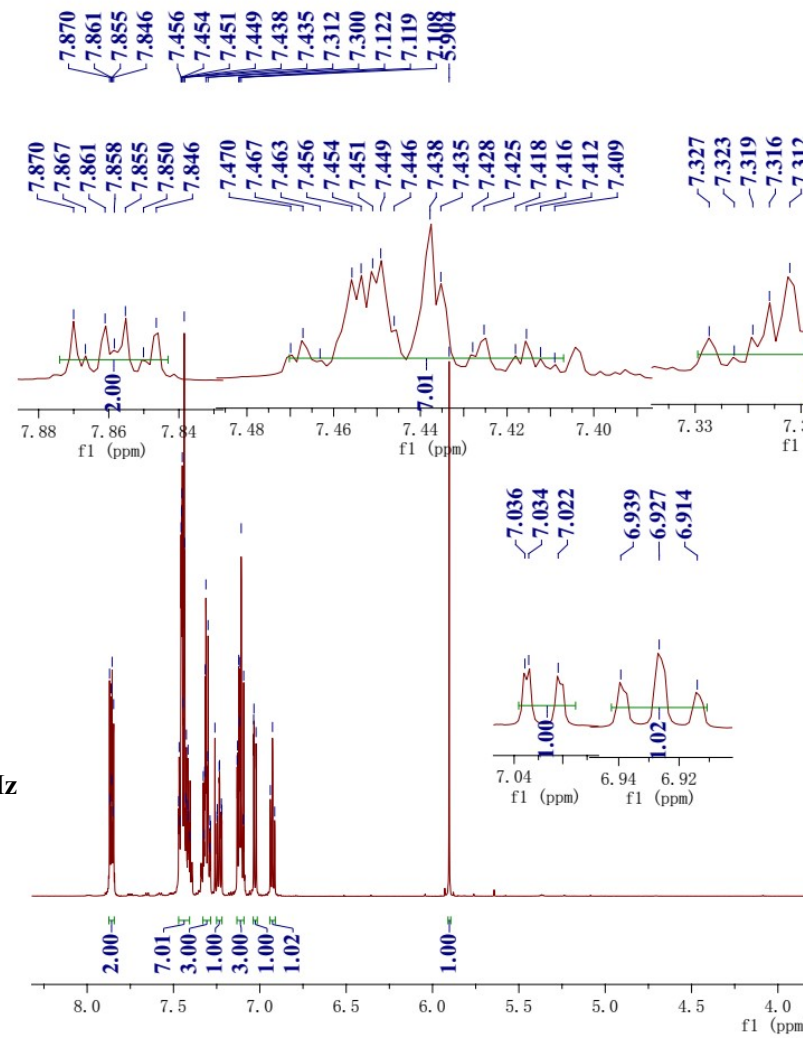

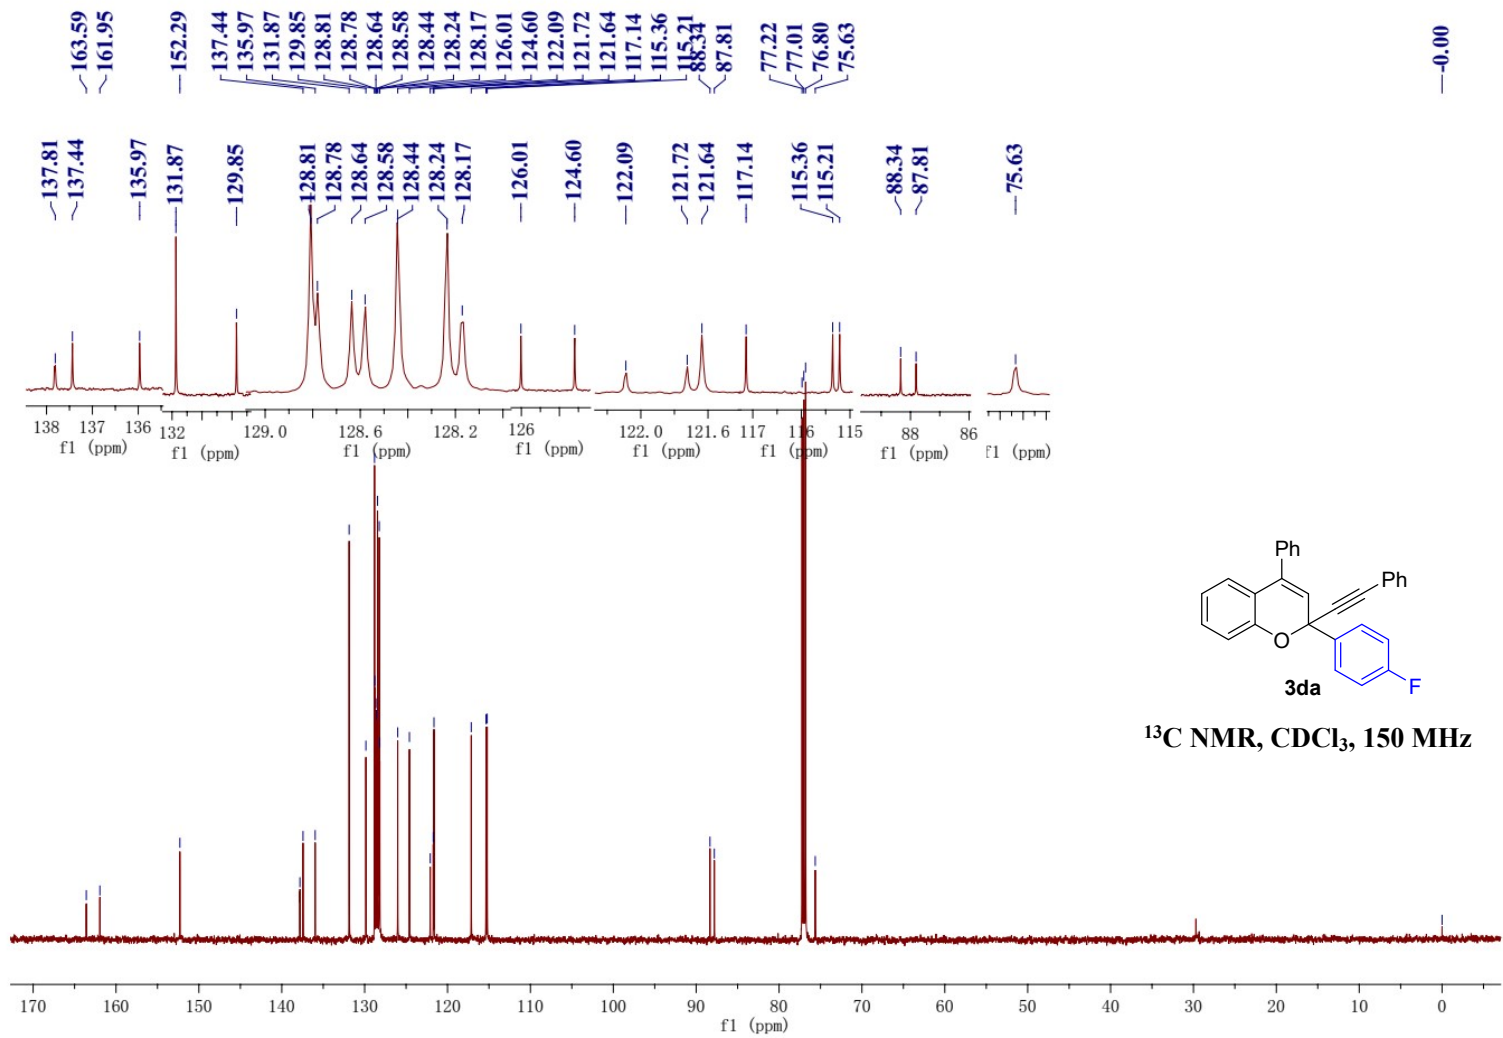

-113.44

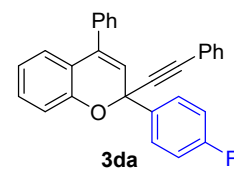

<sup>19</sup>F NMR, CDCl<sub>3</sub>, 565 MHz

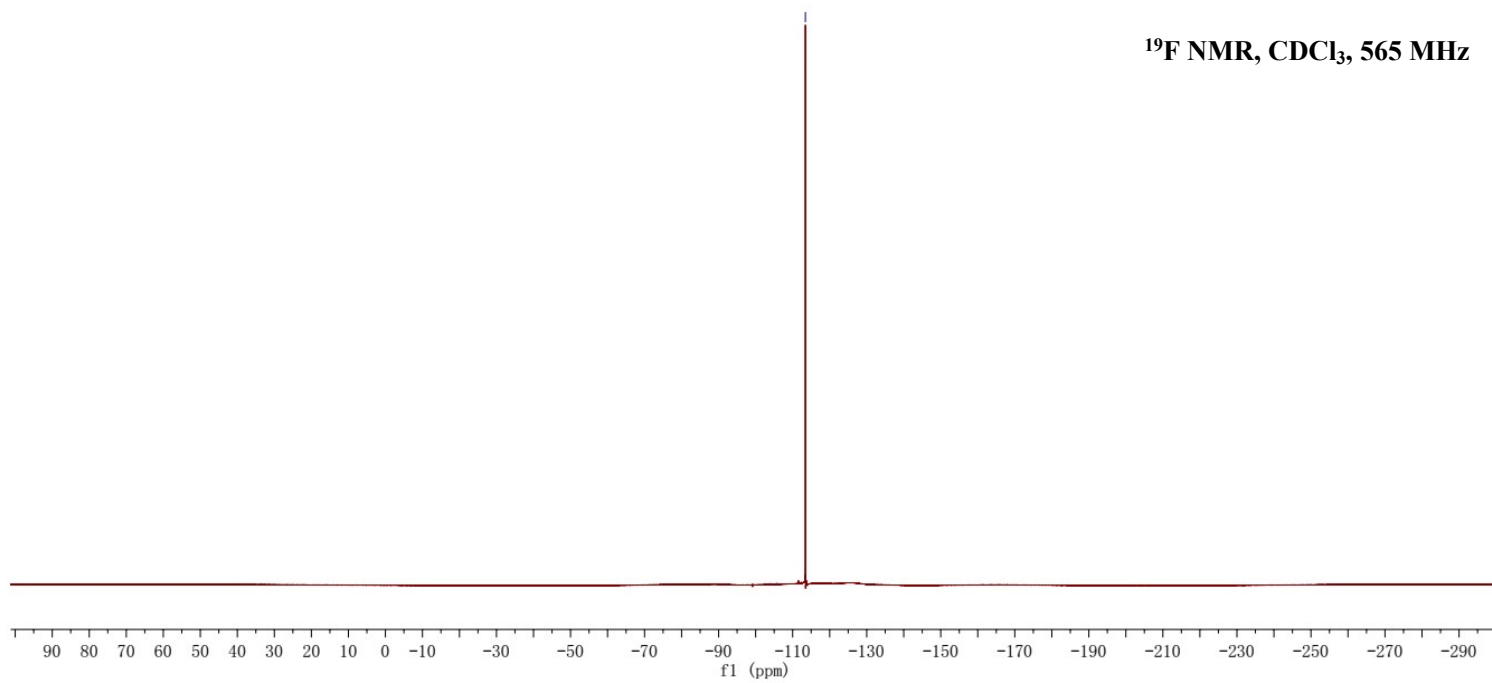

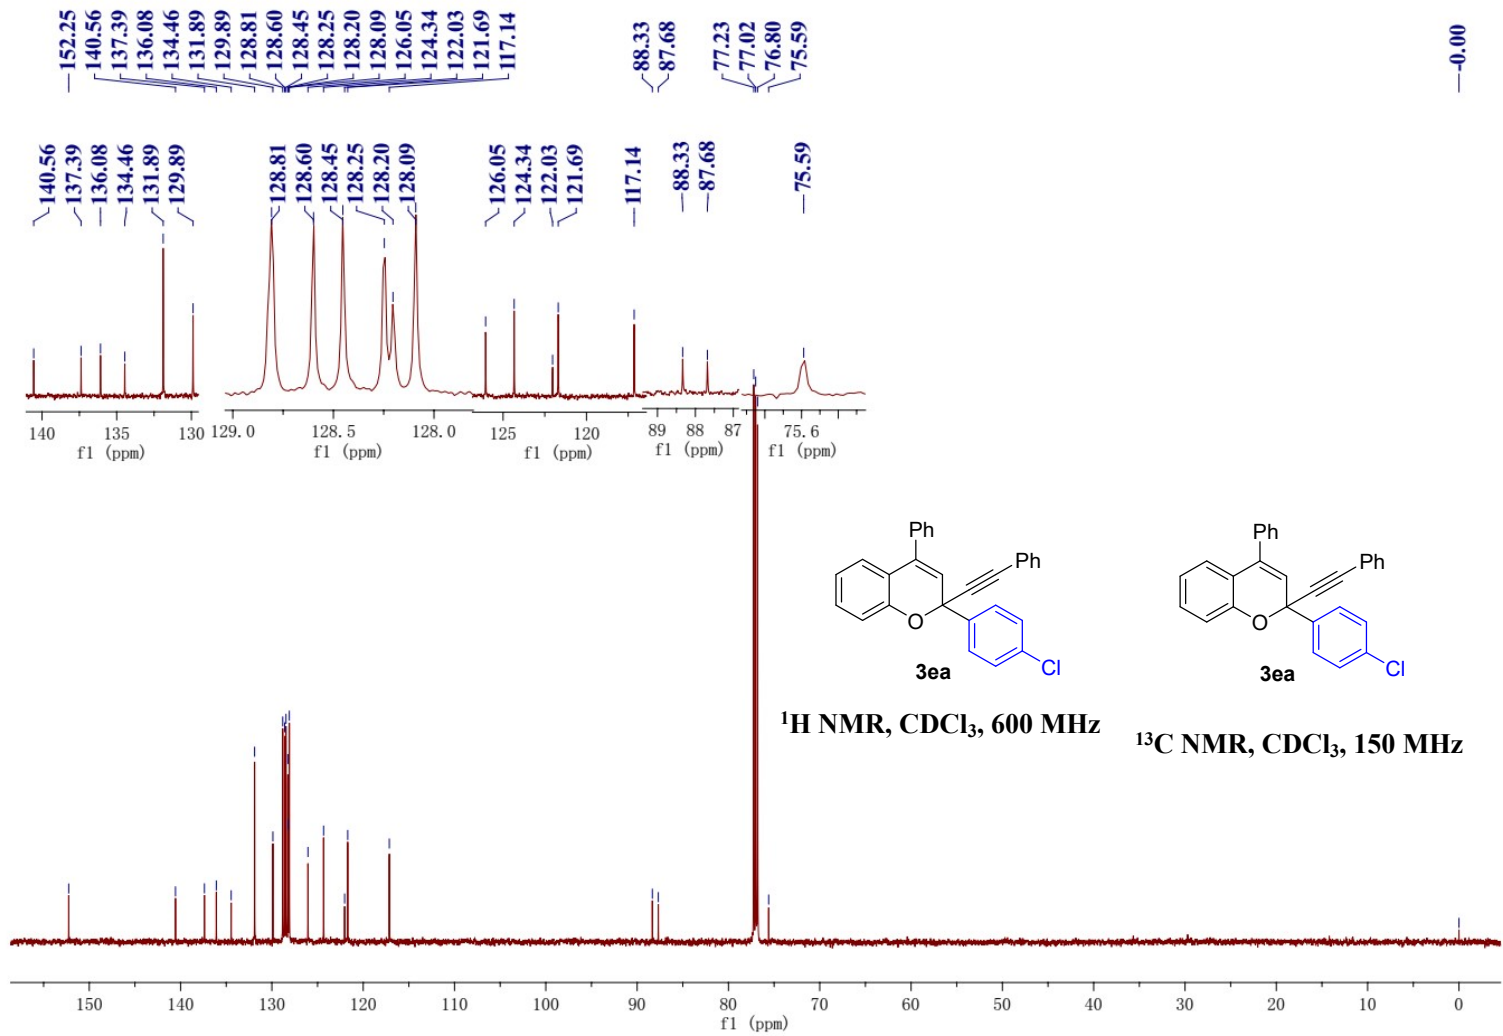

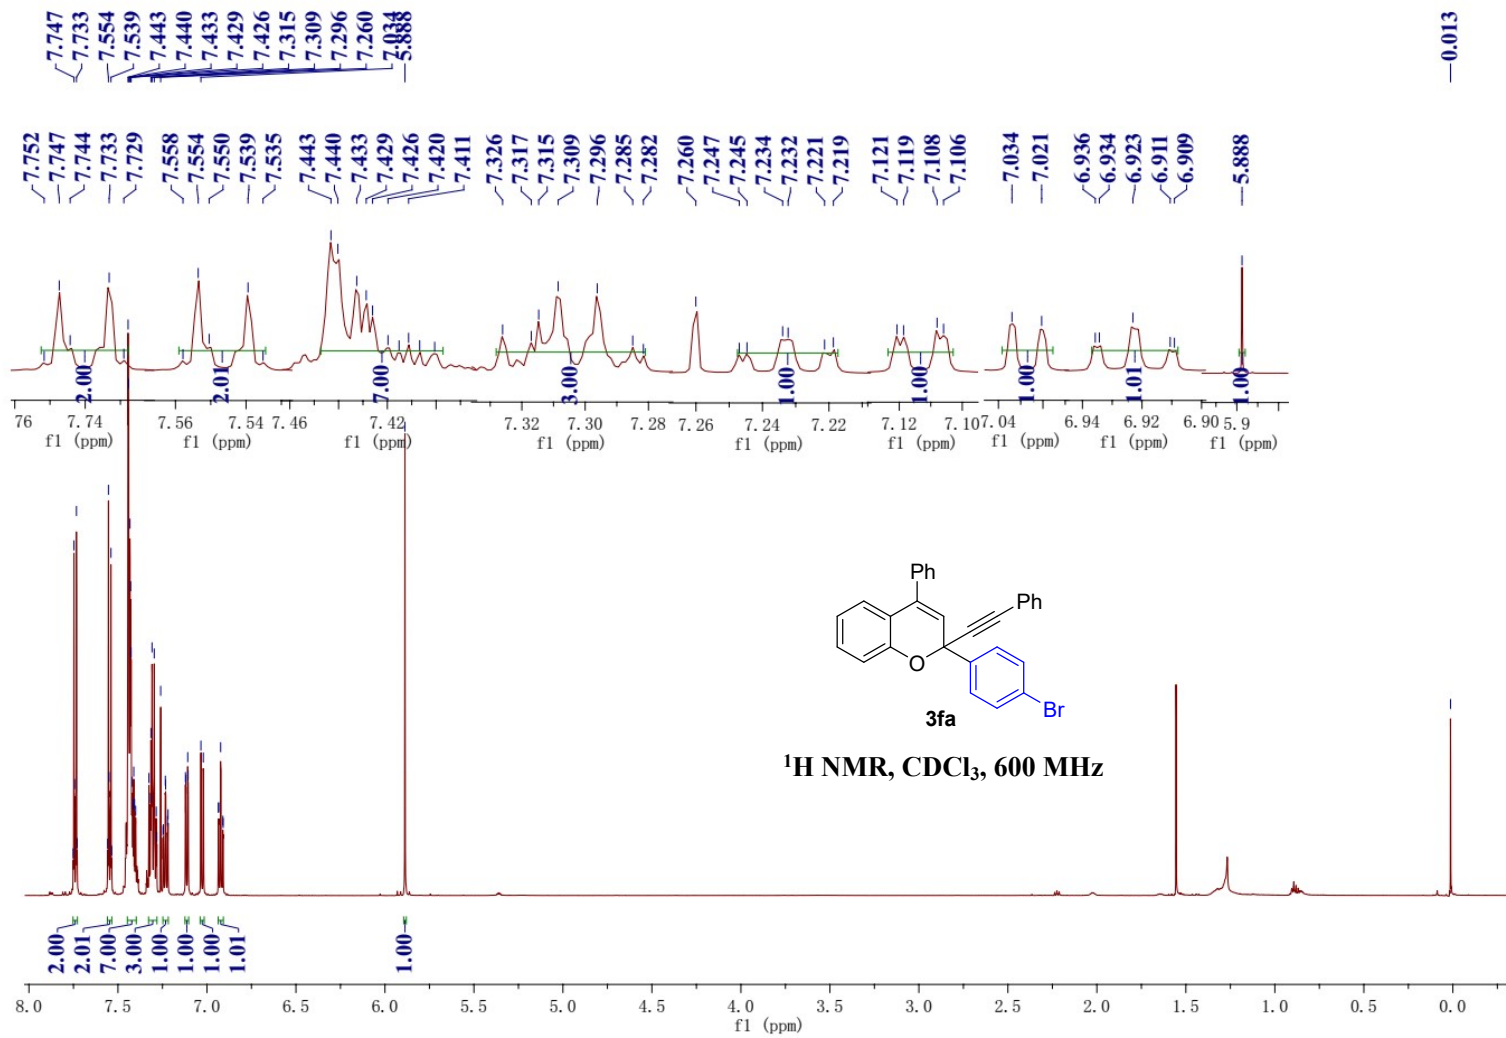

—0.013

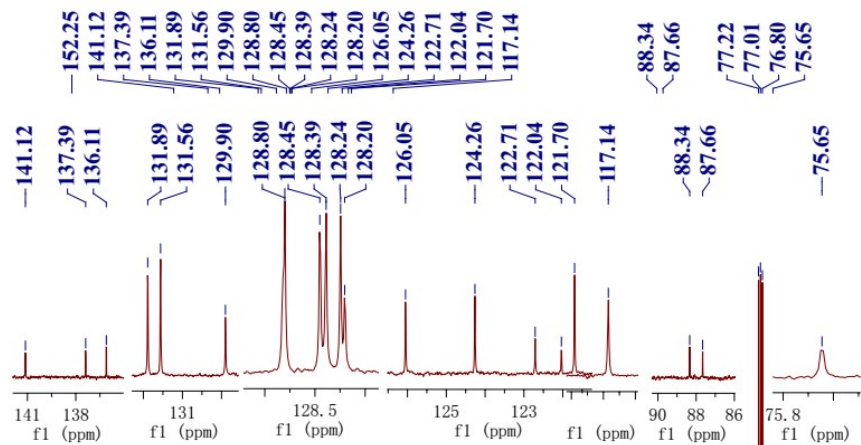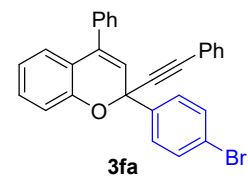

<sup>13</sup>C NMR, CDCl<sub>3</sub>, 150 MHz

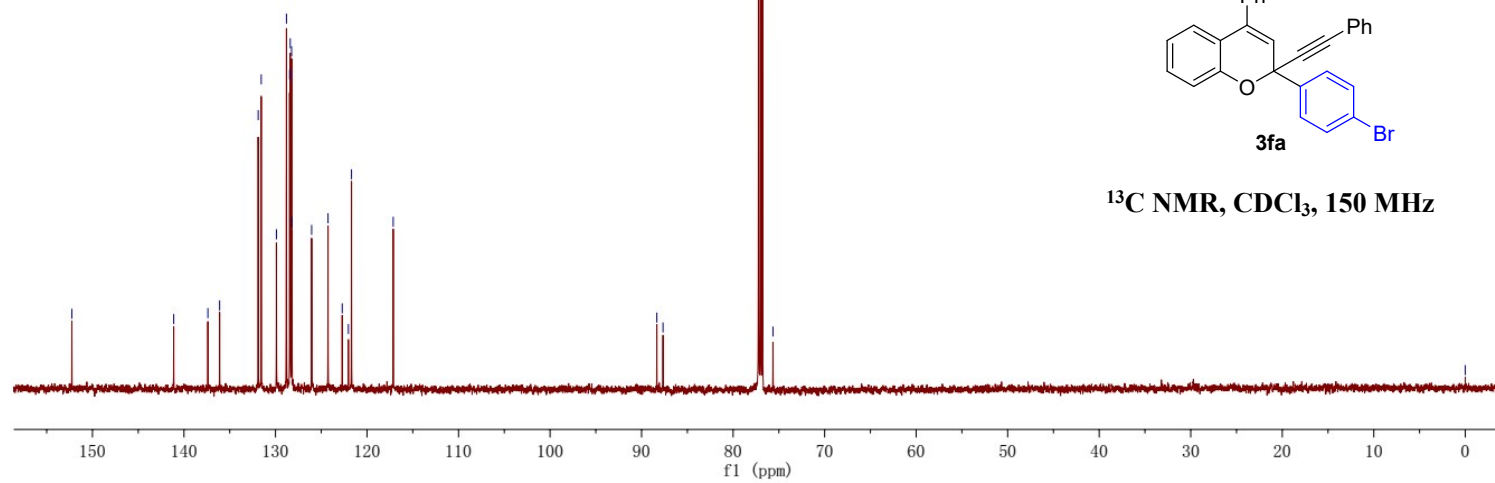



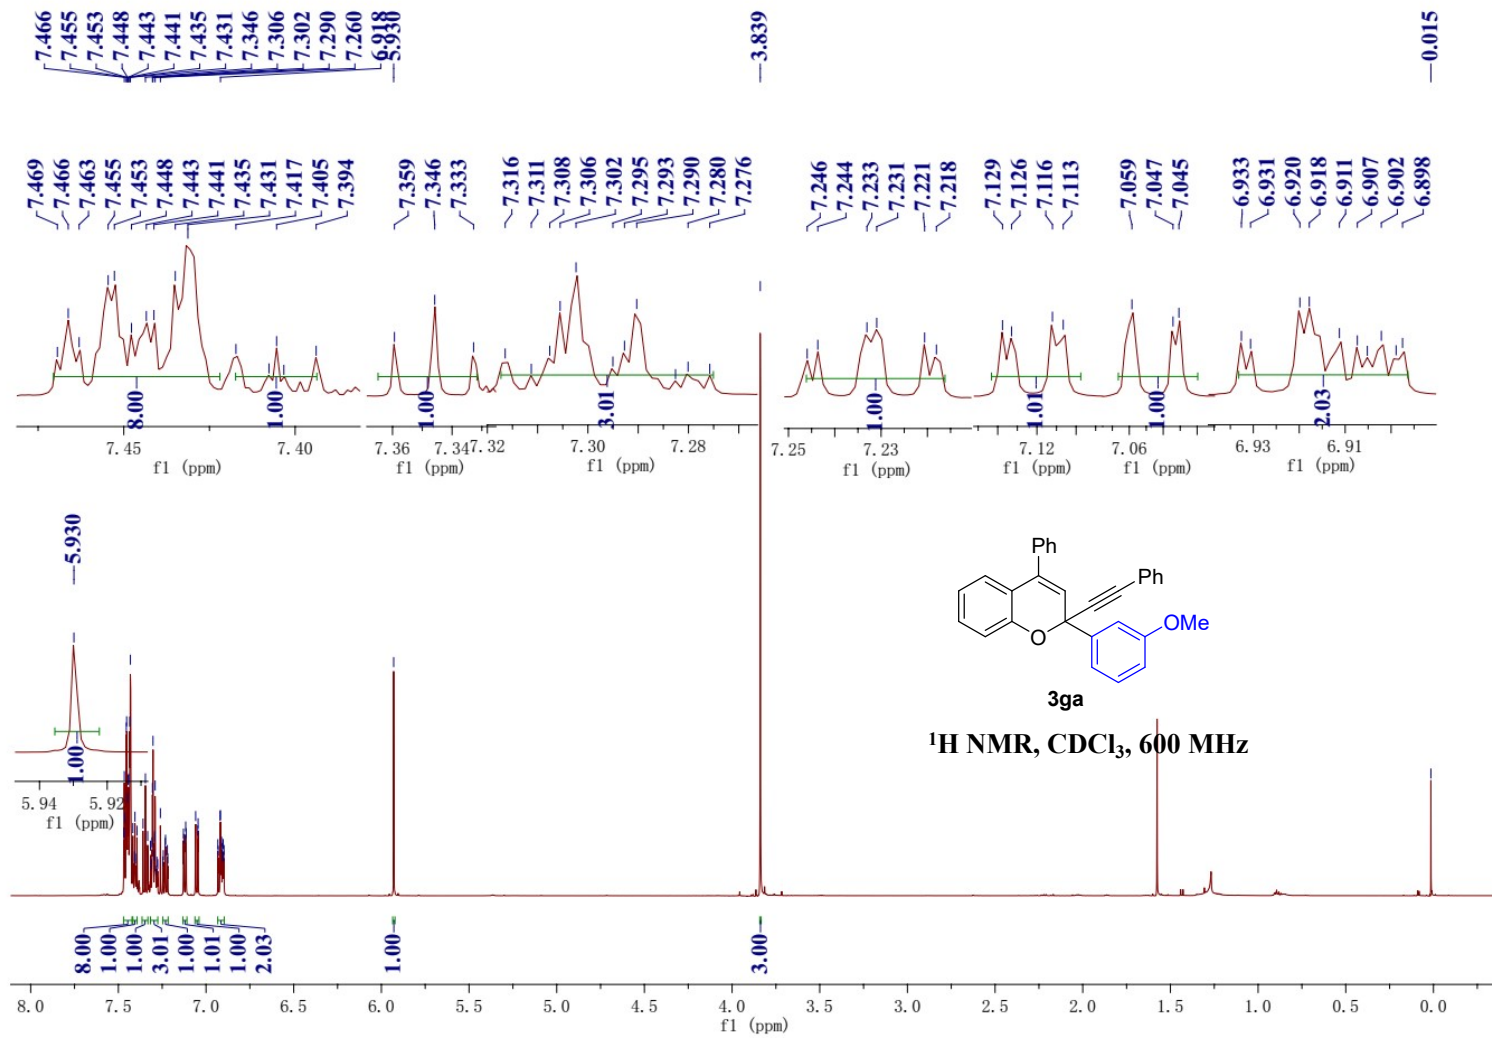

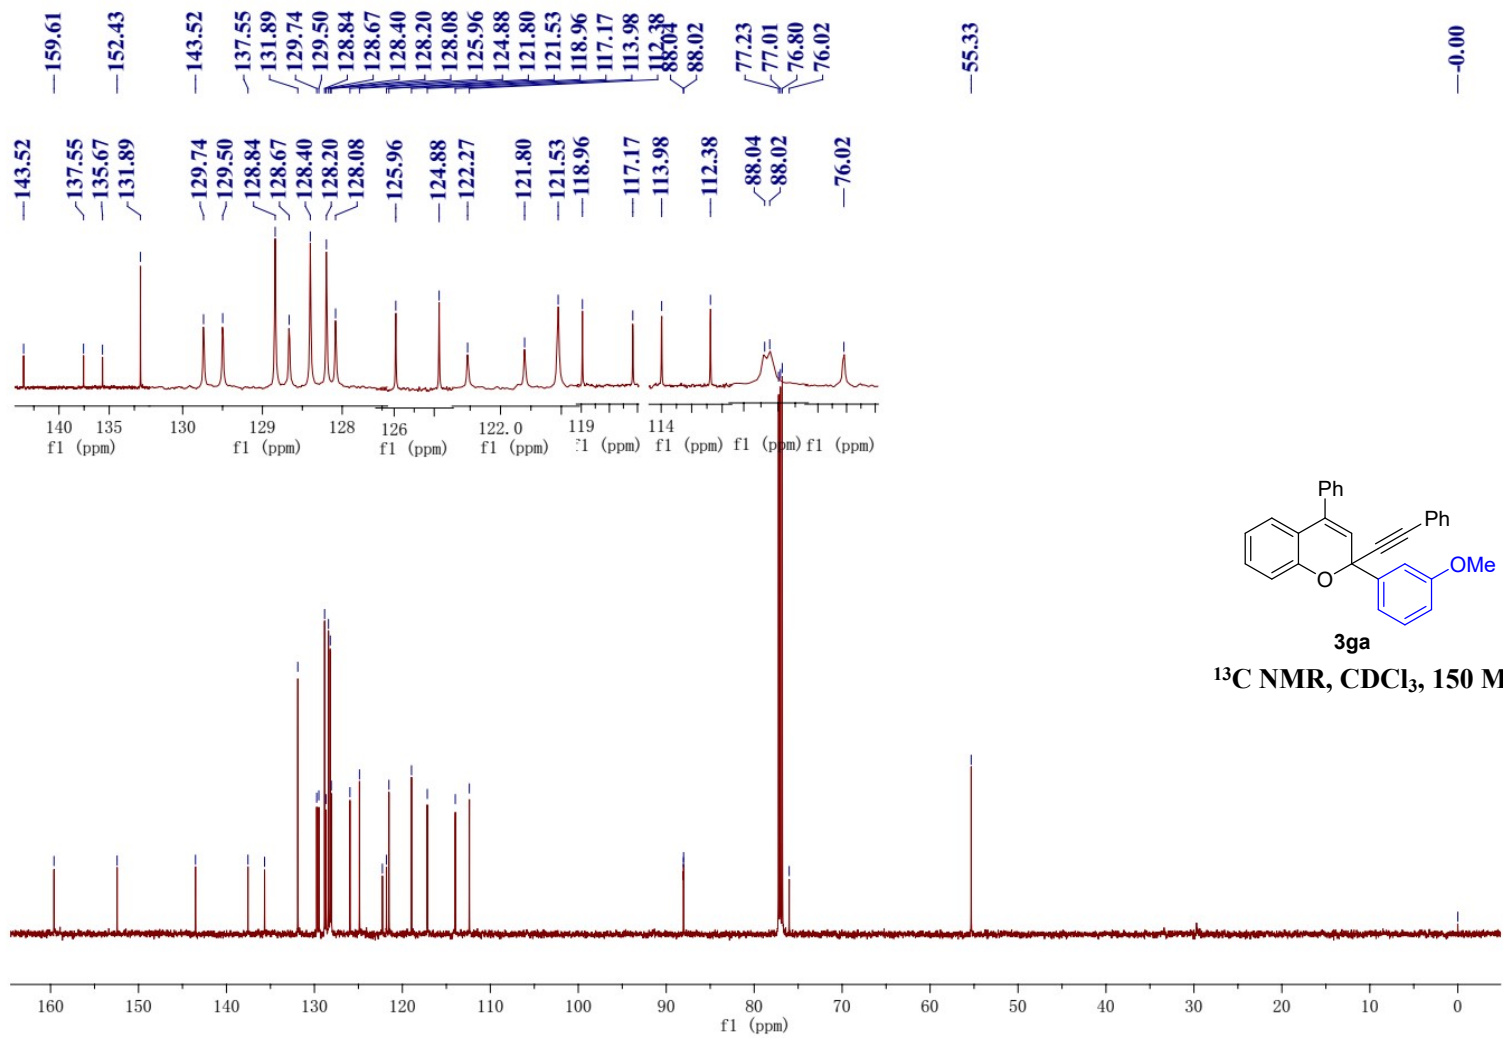

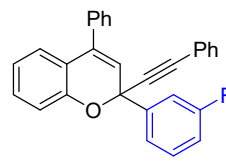

**3ha**

**<sup>1</sup>H NMR, CDCl<sub>3</sub>, 600 MHz**

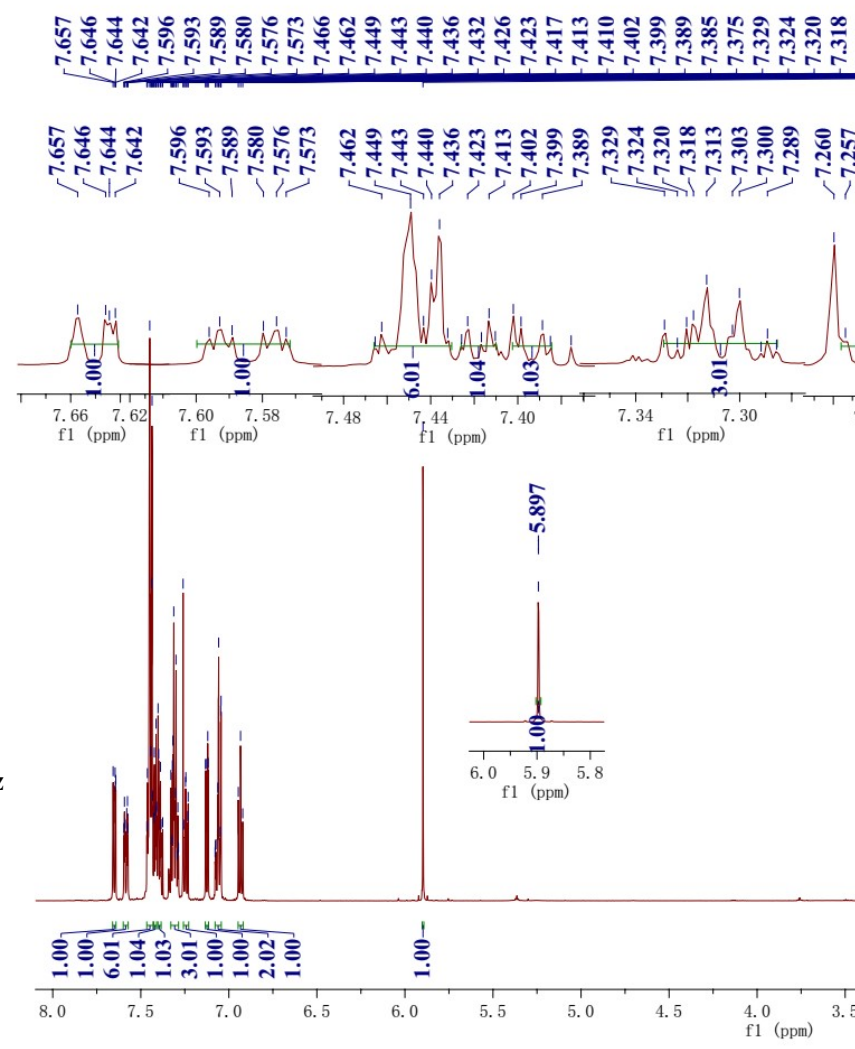

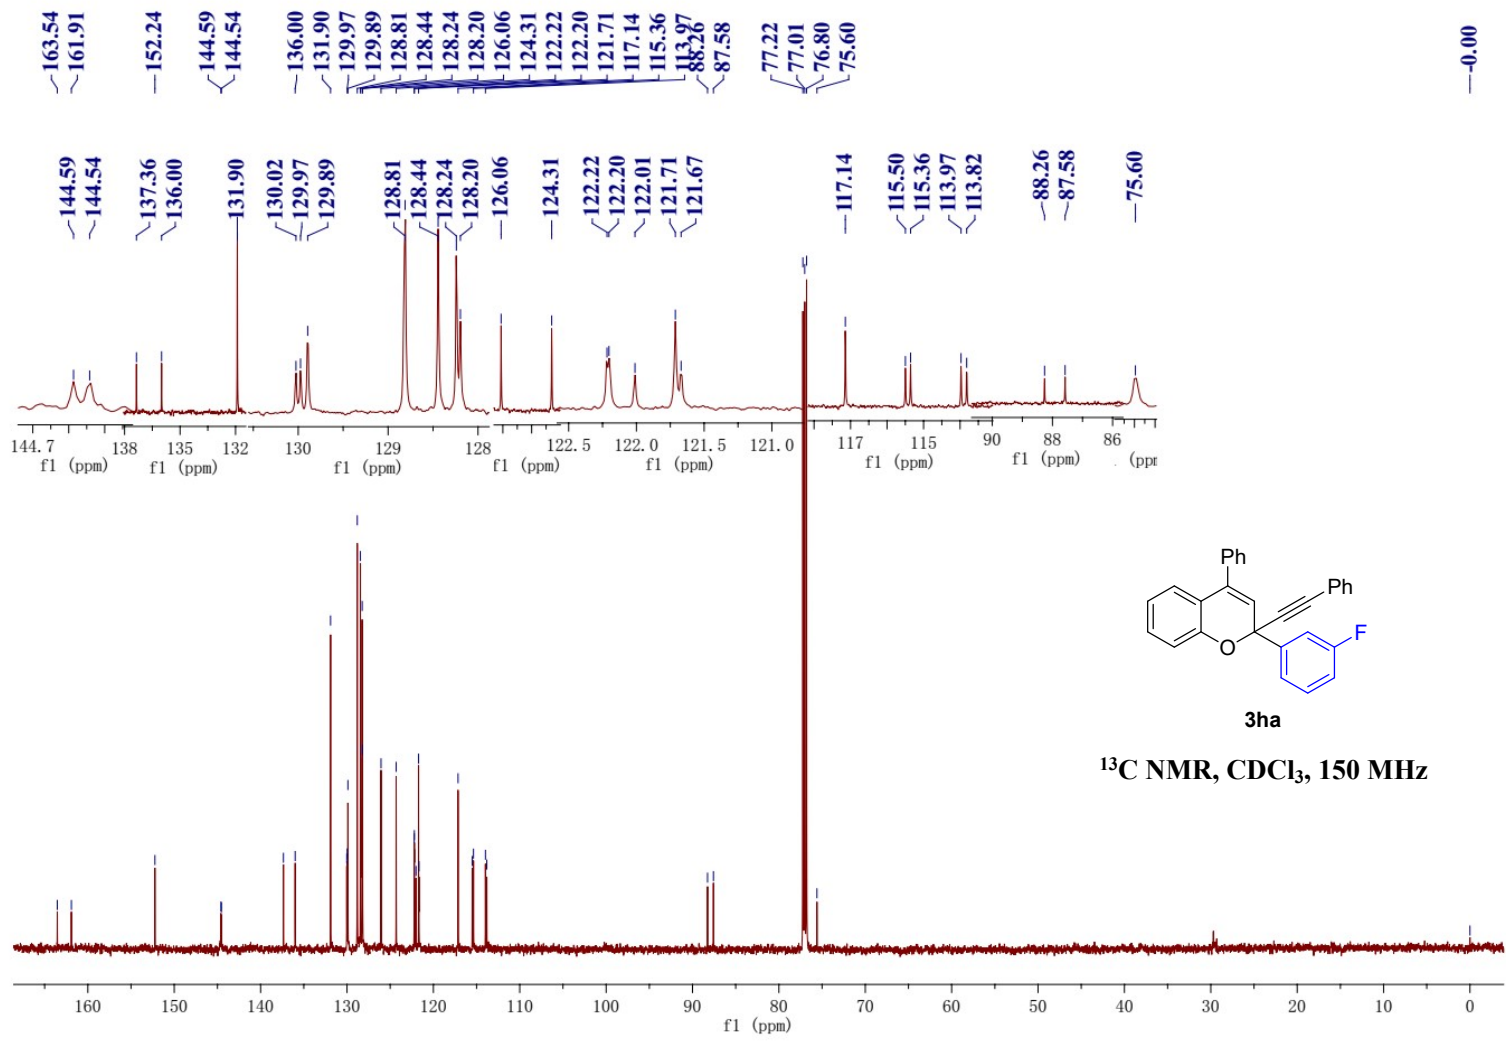

-112.18

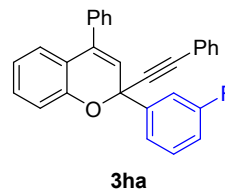

<sup>19</sup>F NMR, CDCl<sub>3</sub>, 565 MHz

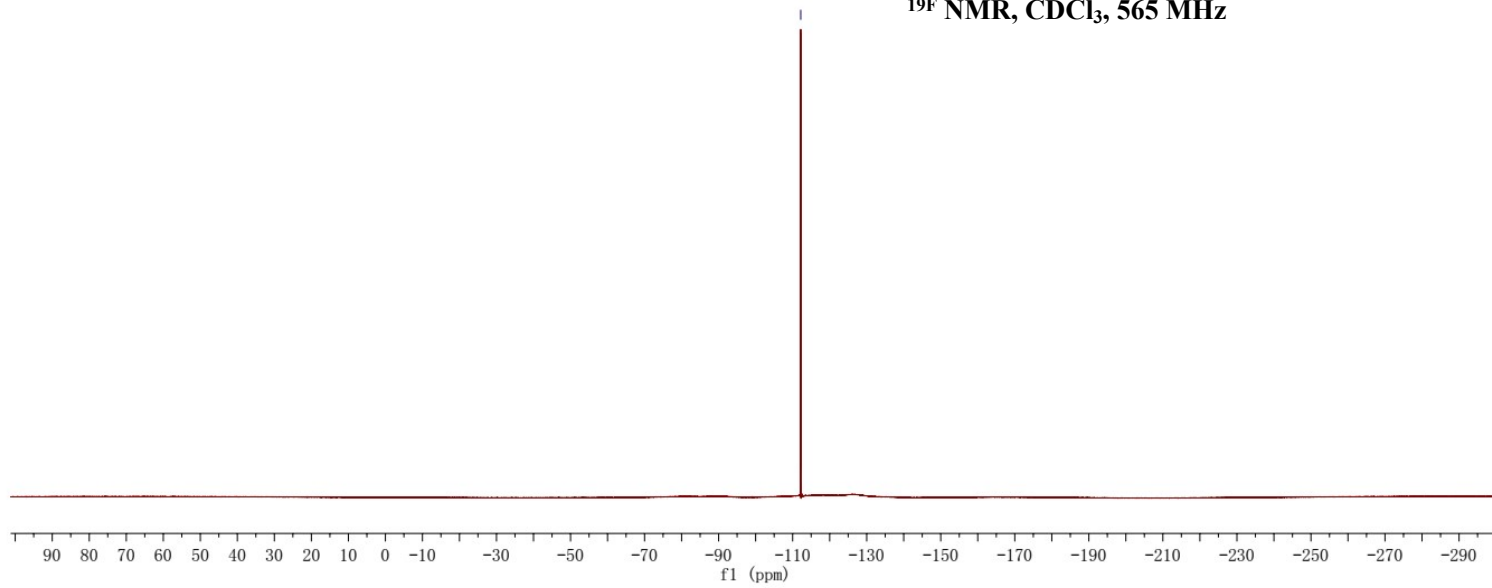

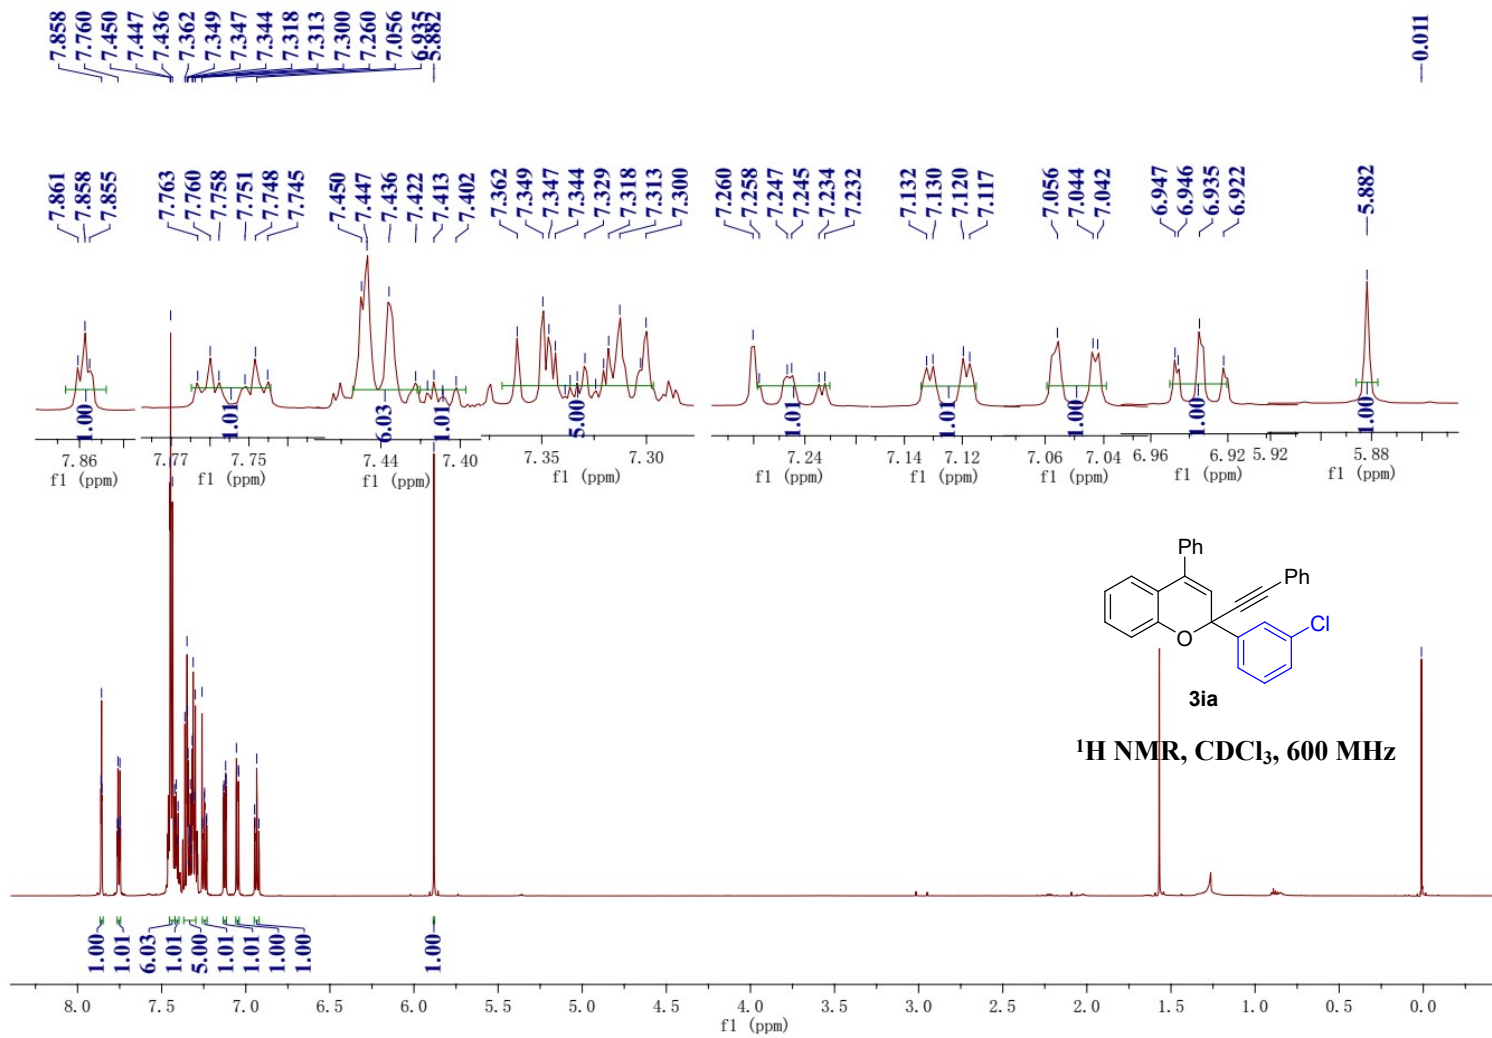

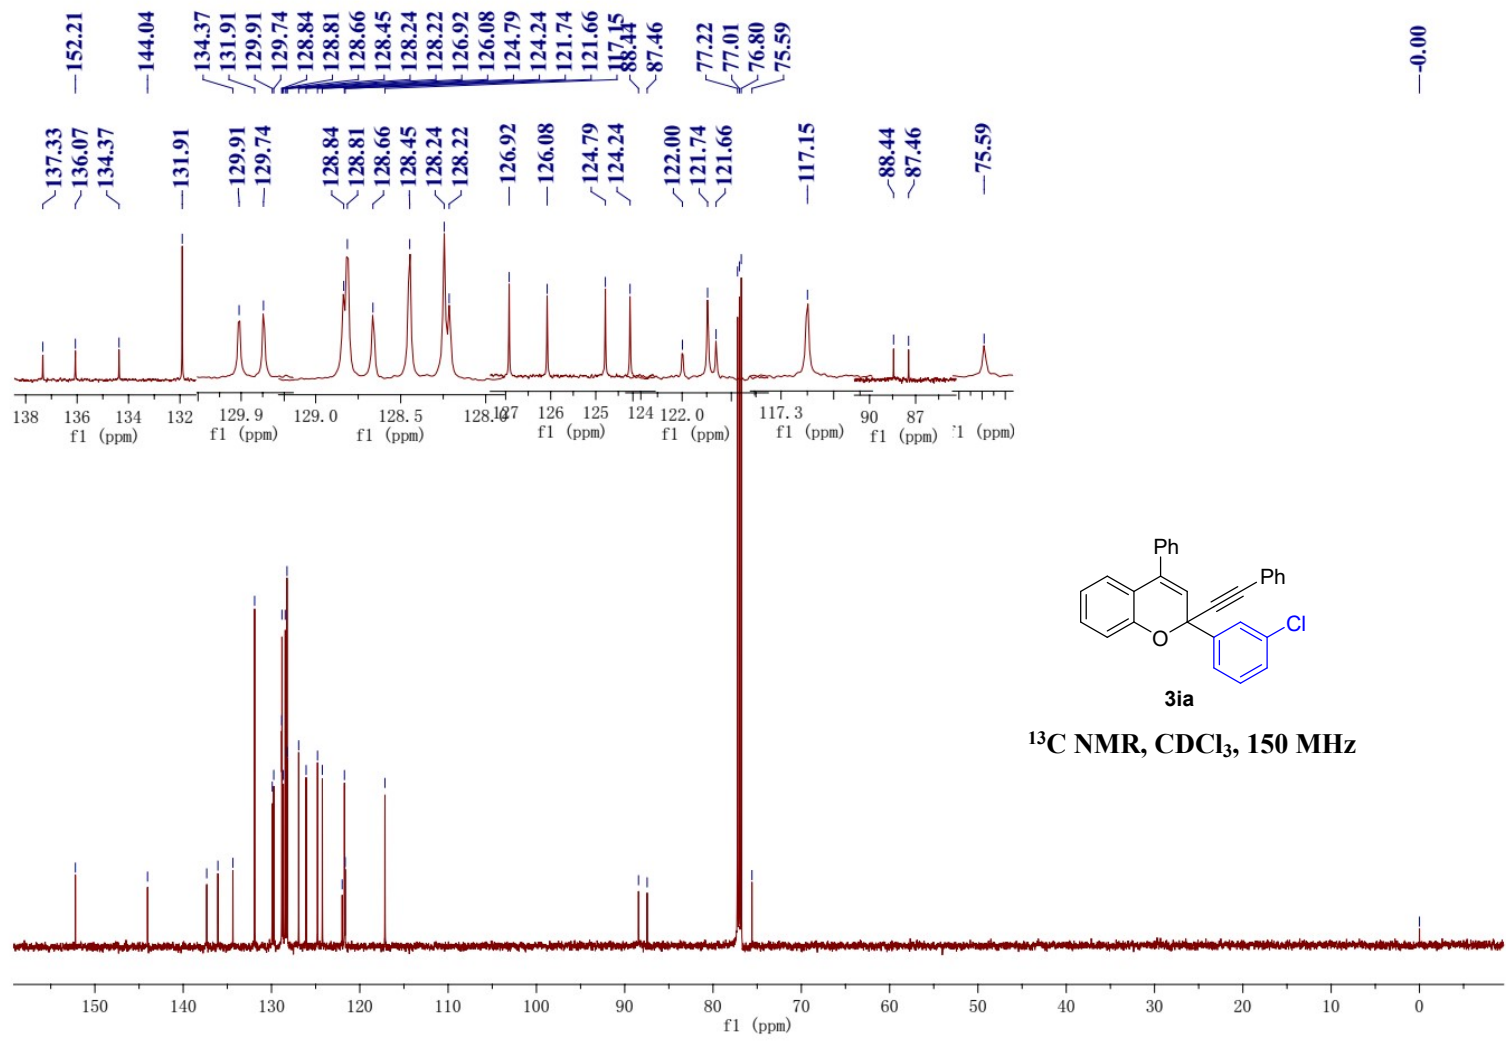

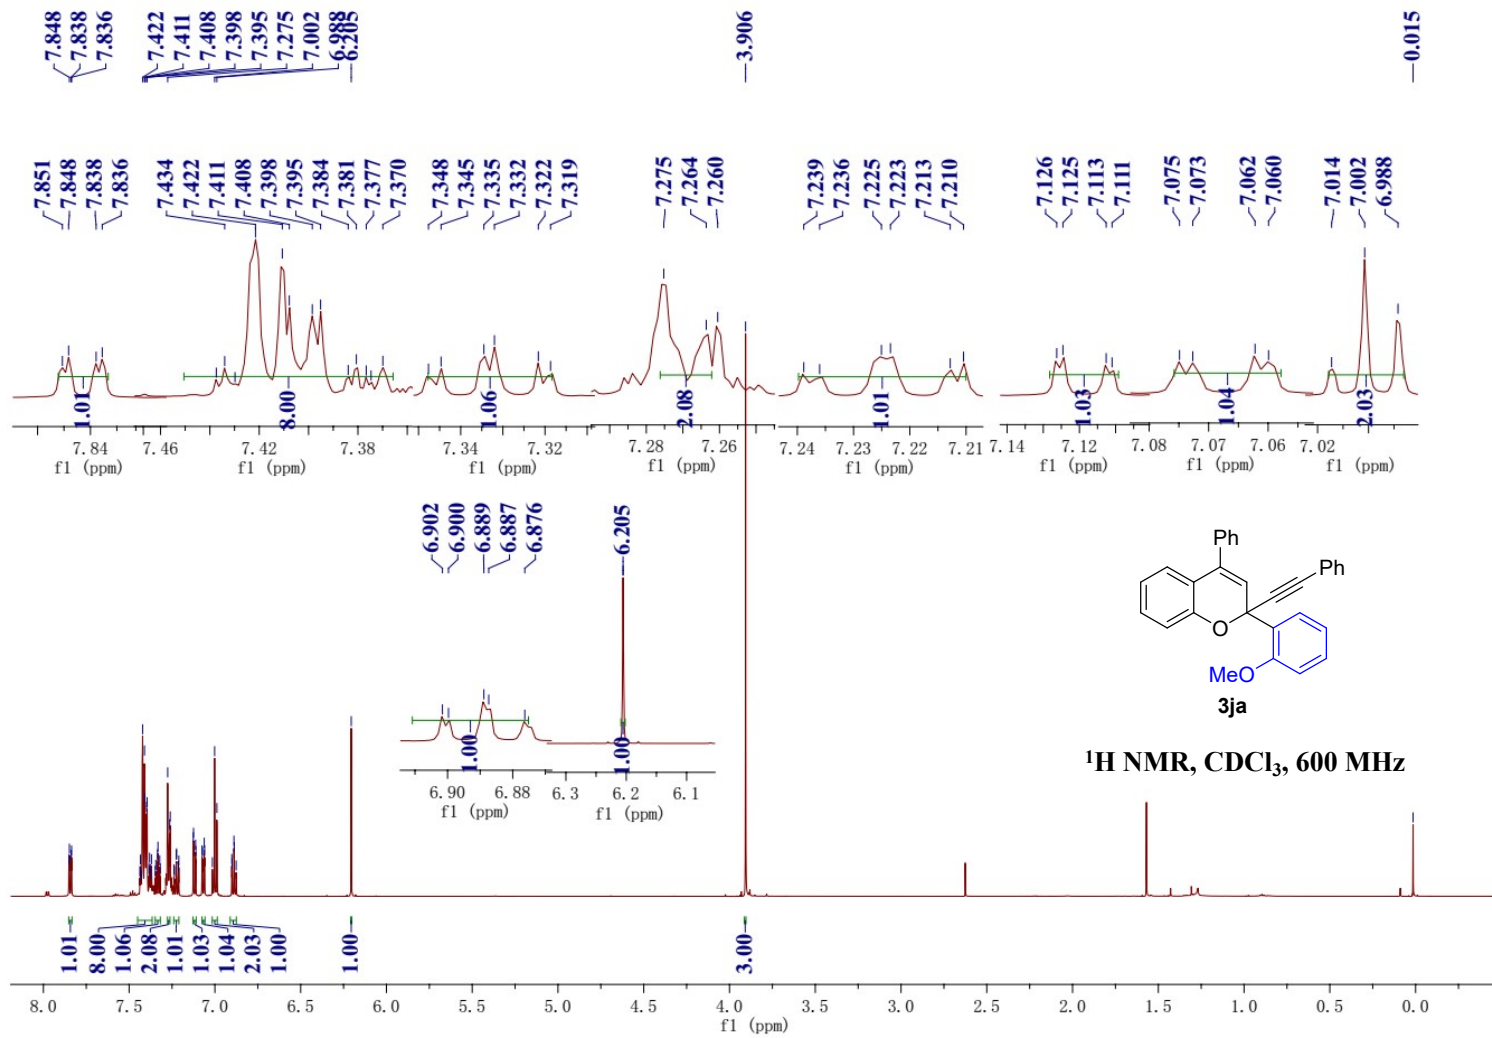



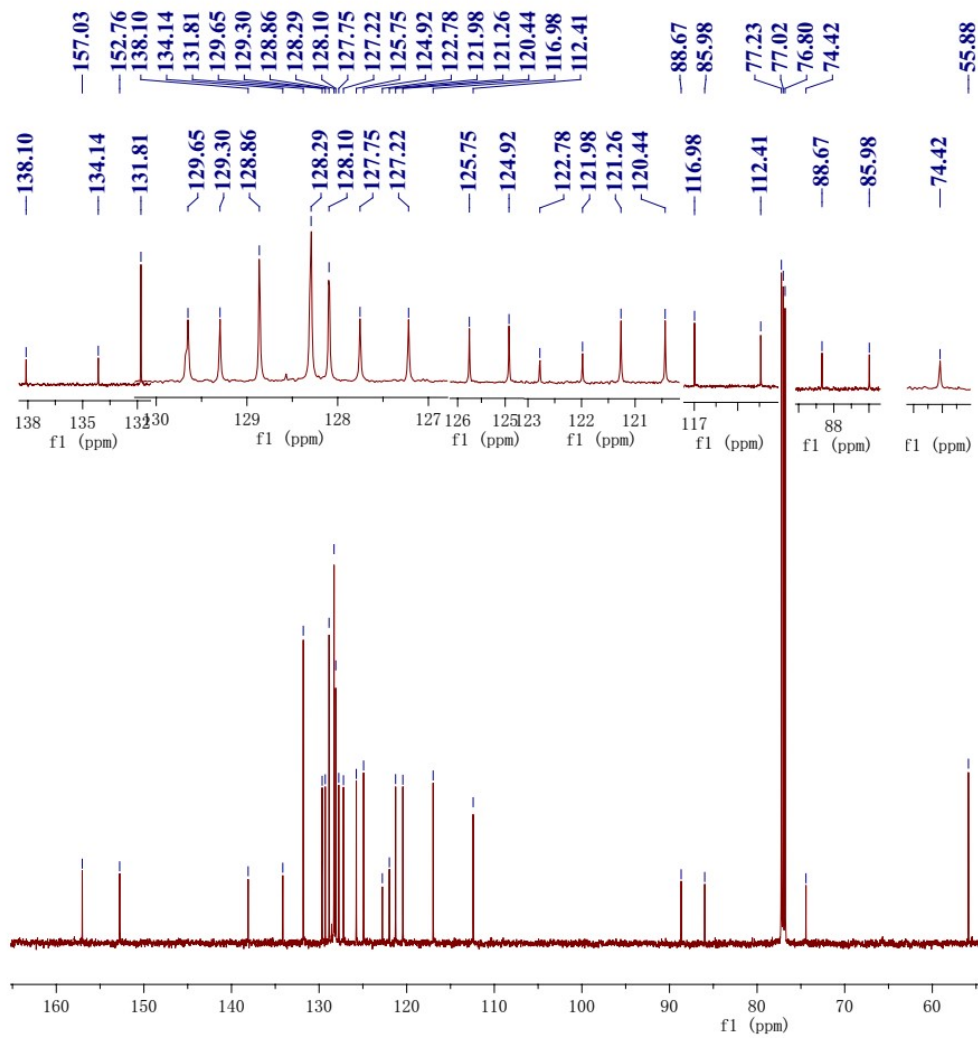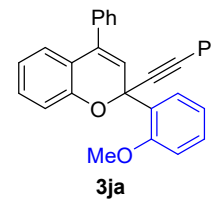

<sup>13</sup>C NMR, CDCl<sub>3</sub>, 150 MHz

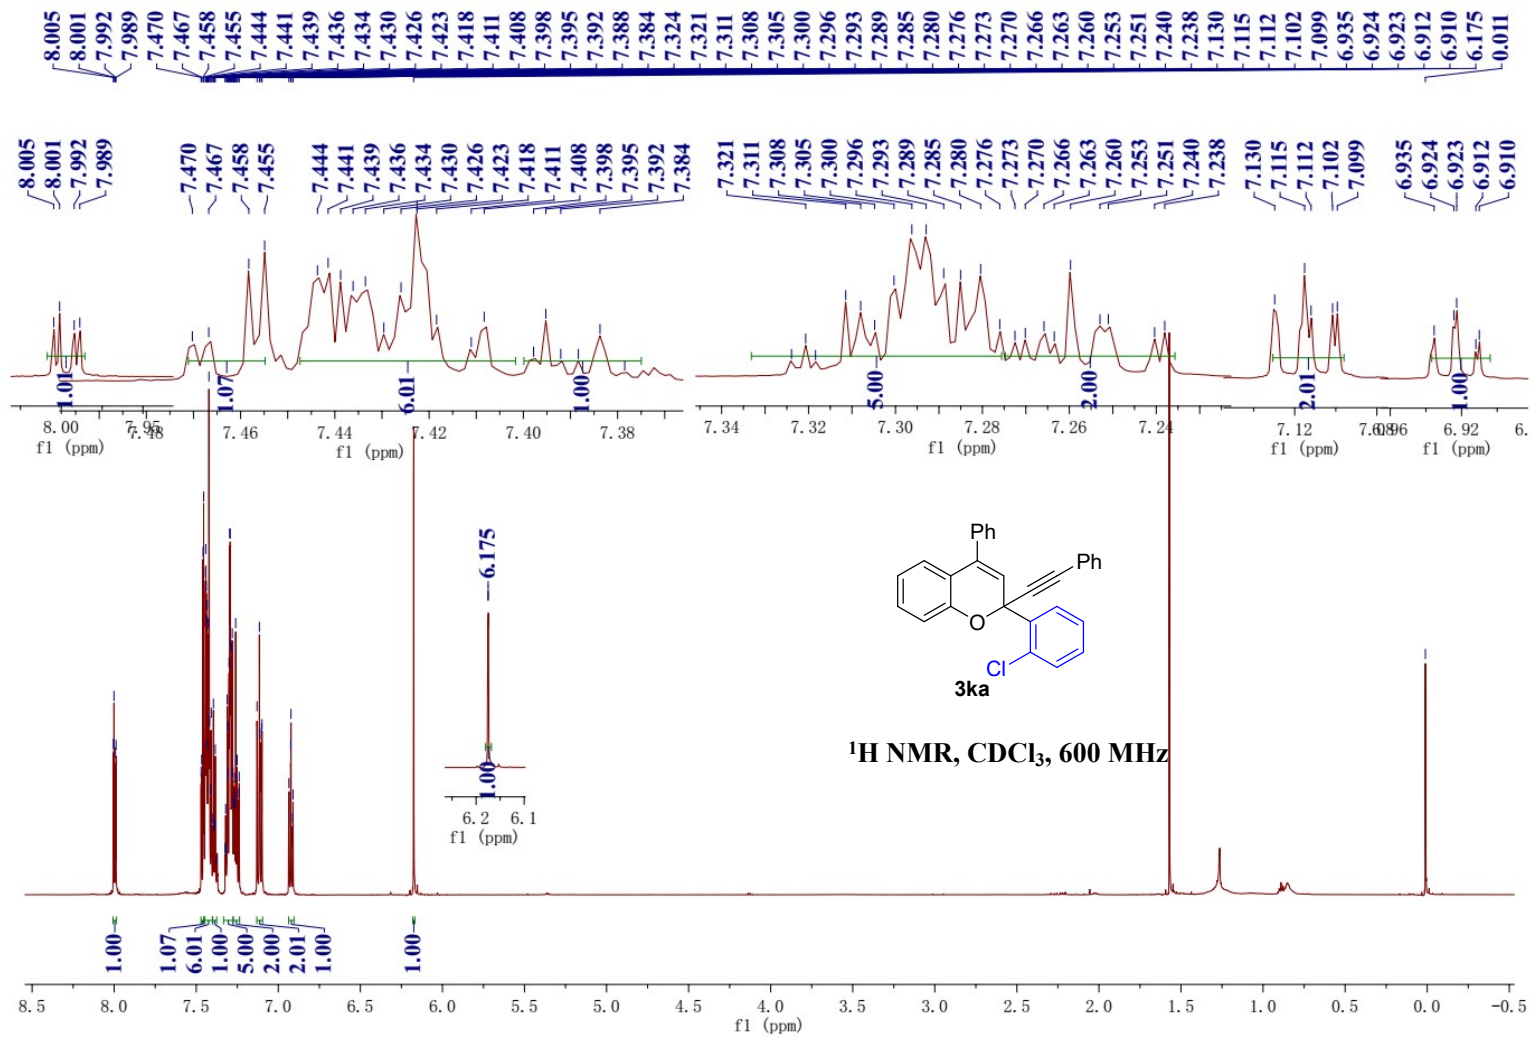

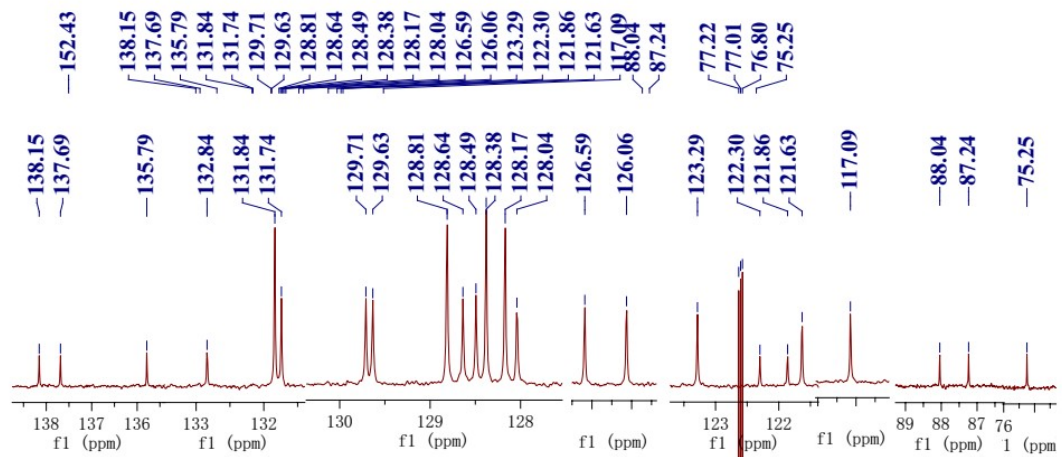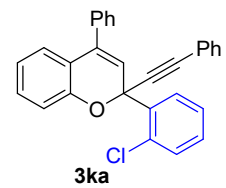

**<sup>13</sup>C NMR, CDCl<sub>3</sub>, 150 MHz**

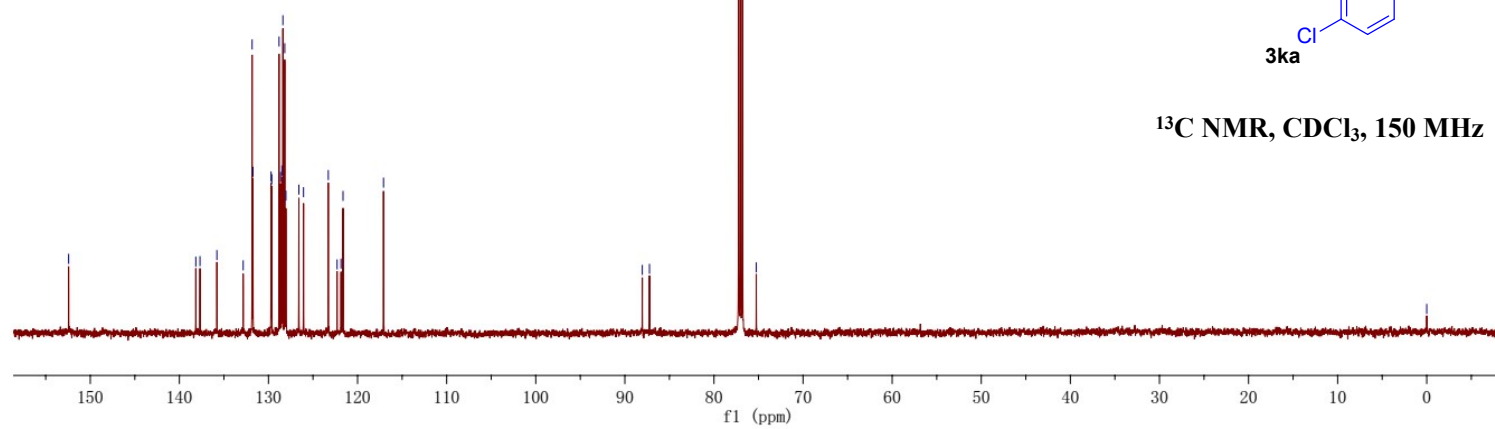

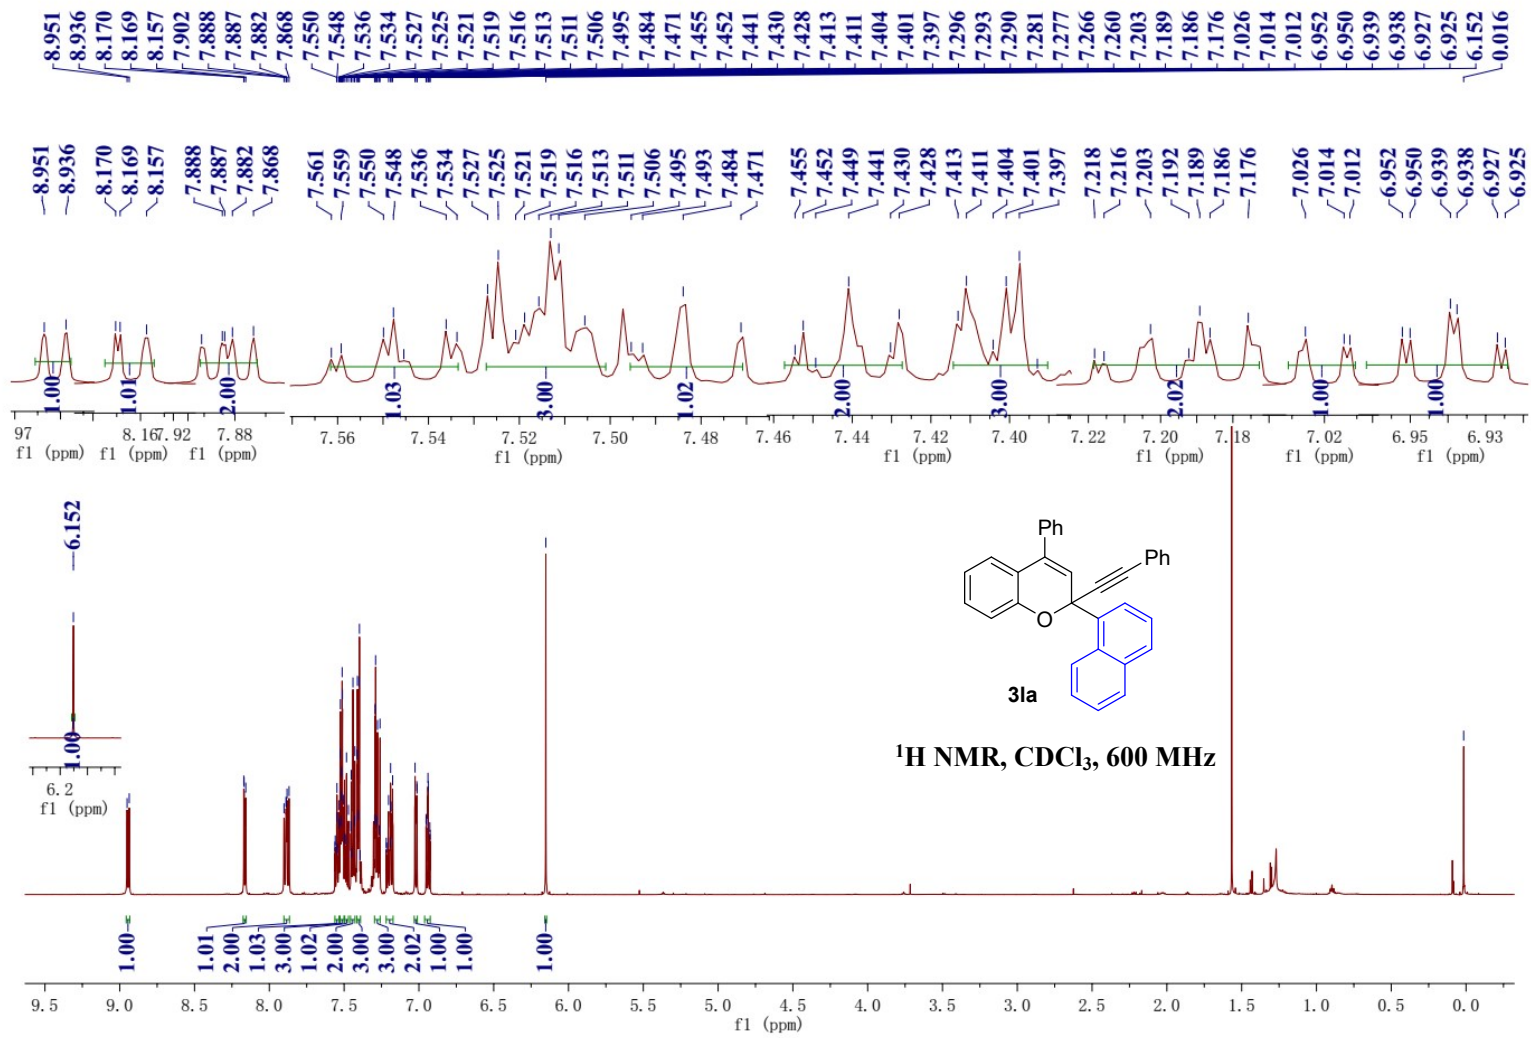

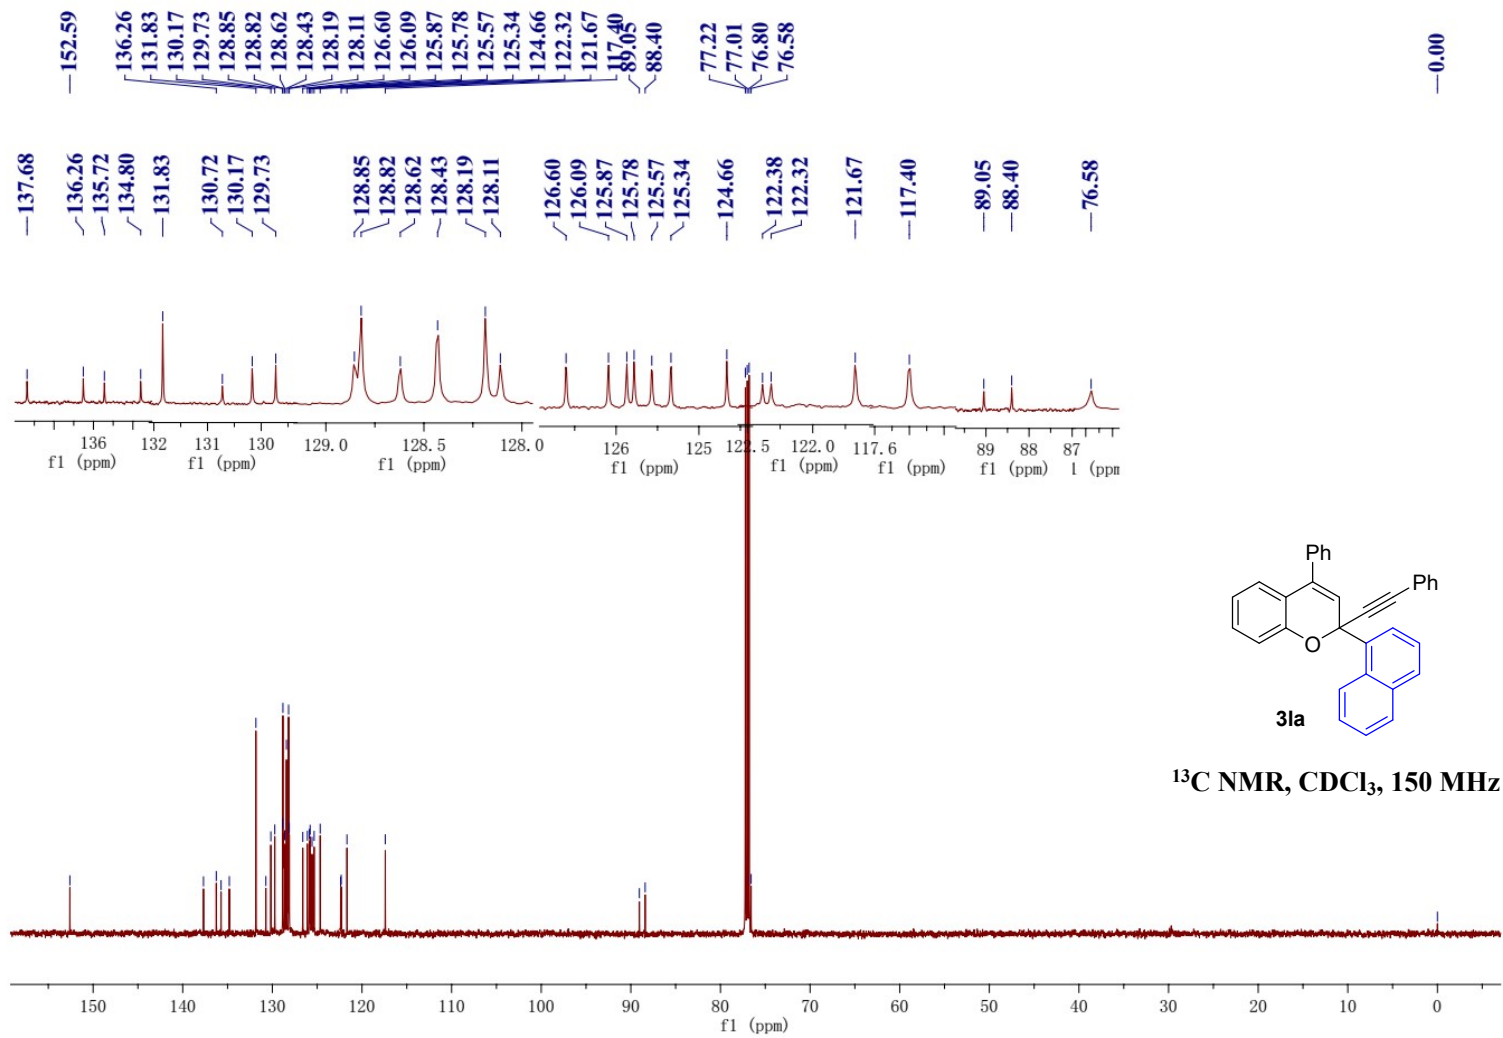

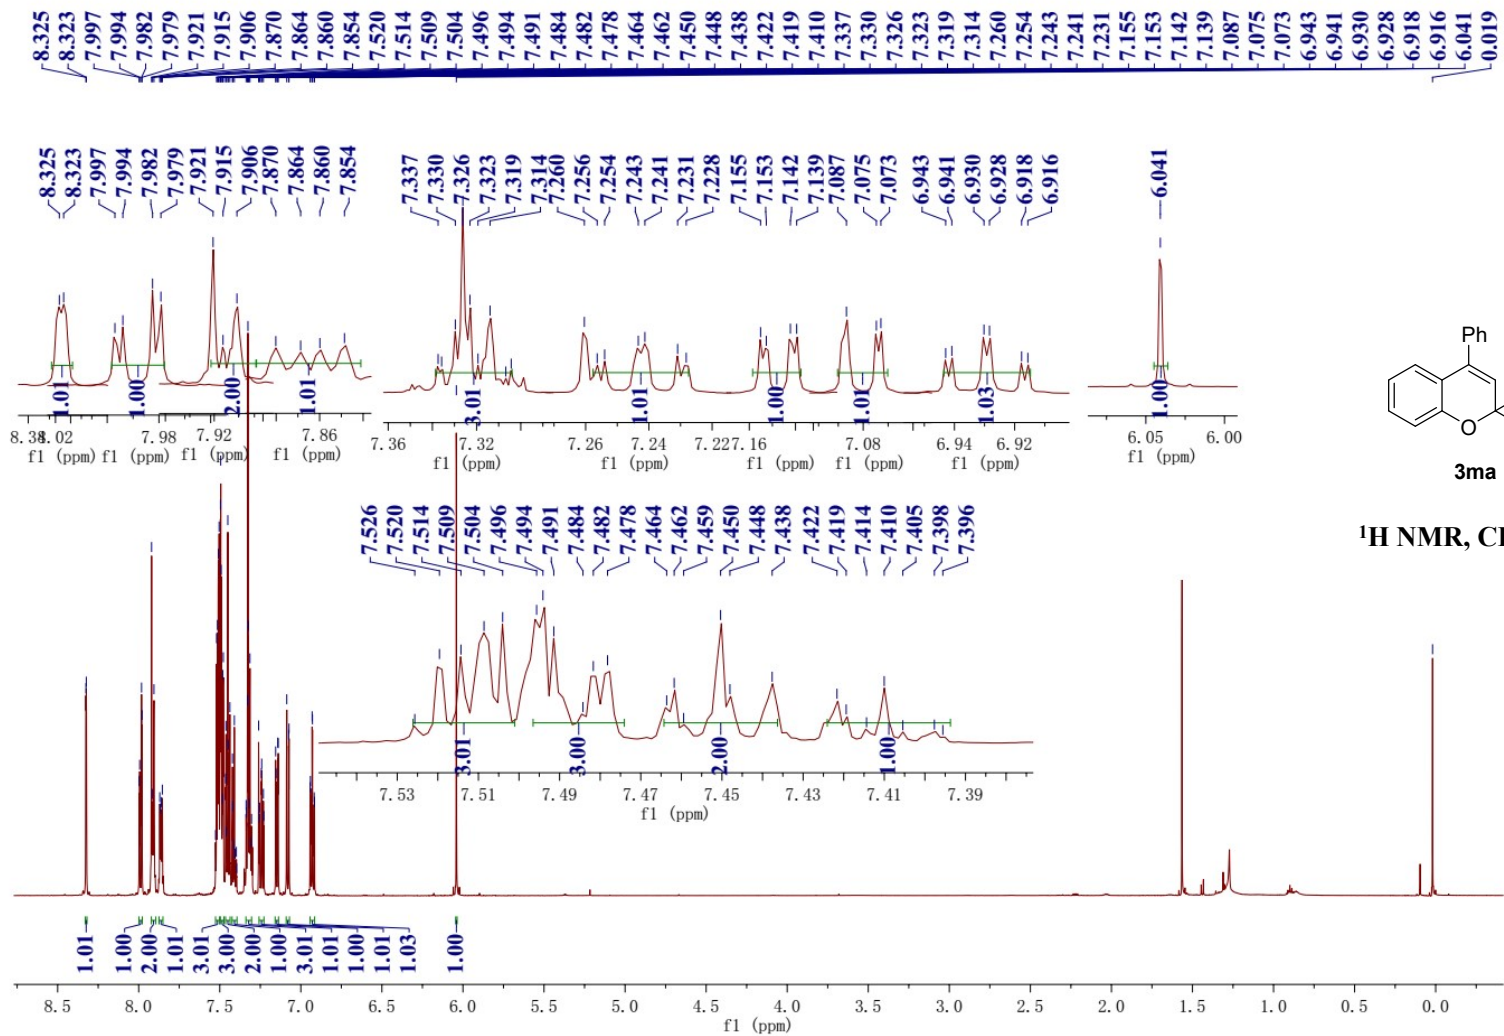



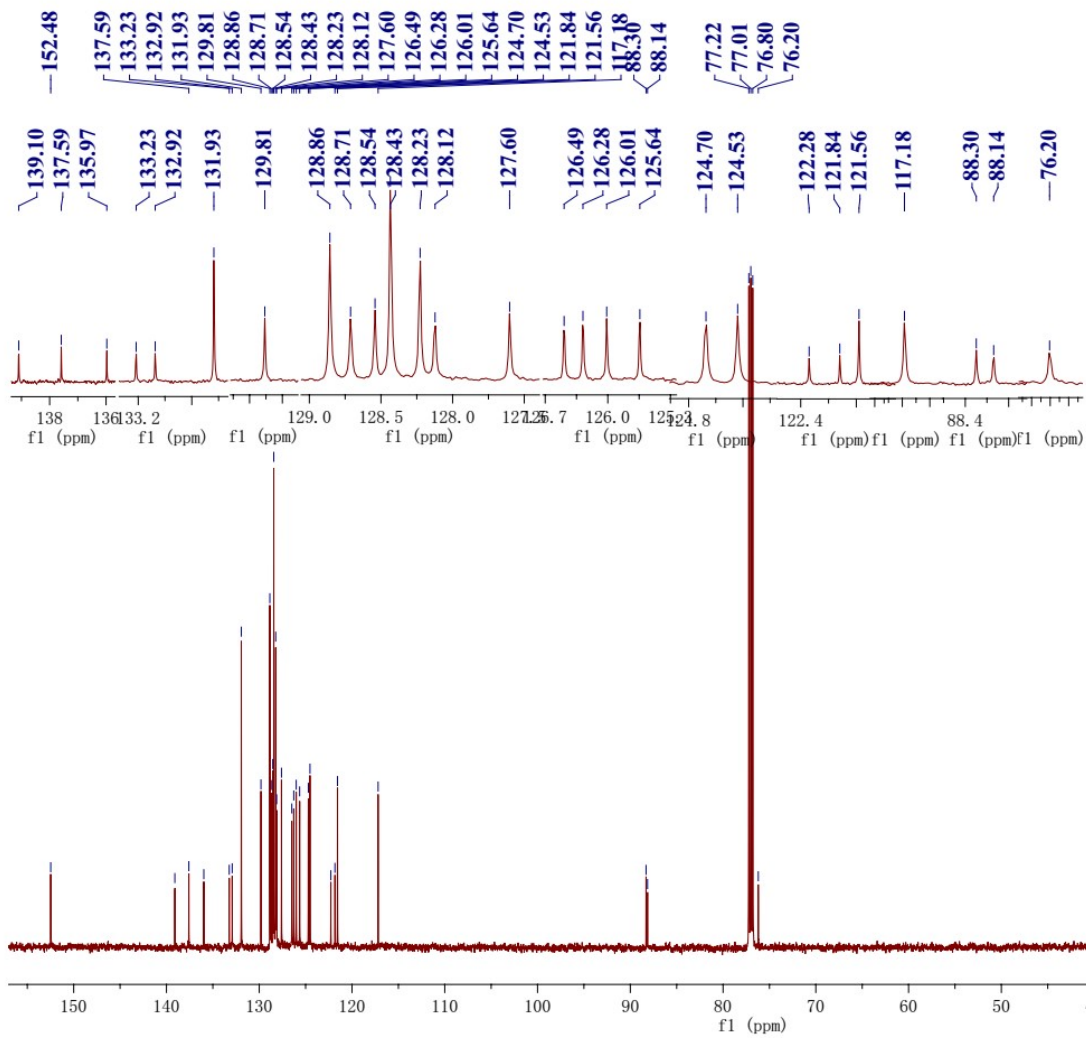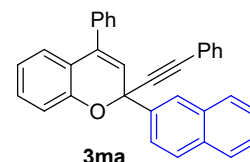

<sup>13</sup>C NMR, CDCl<sub>3</sub>, 150 MHz

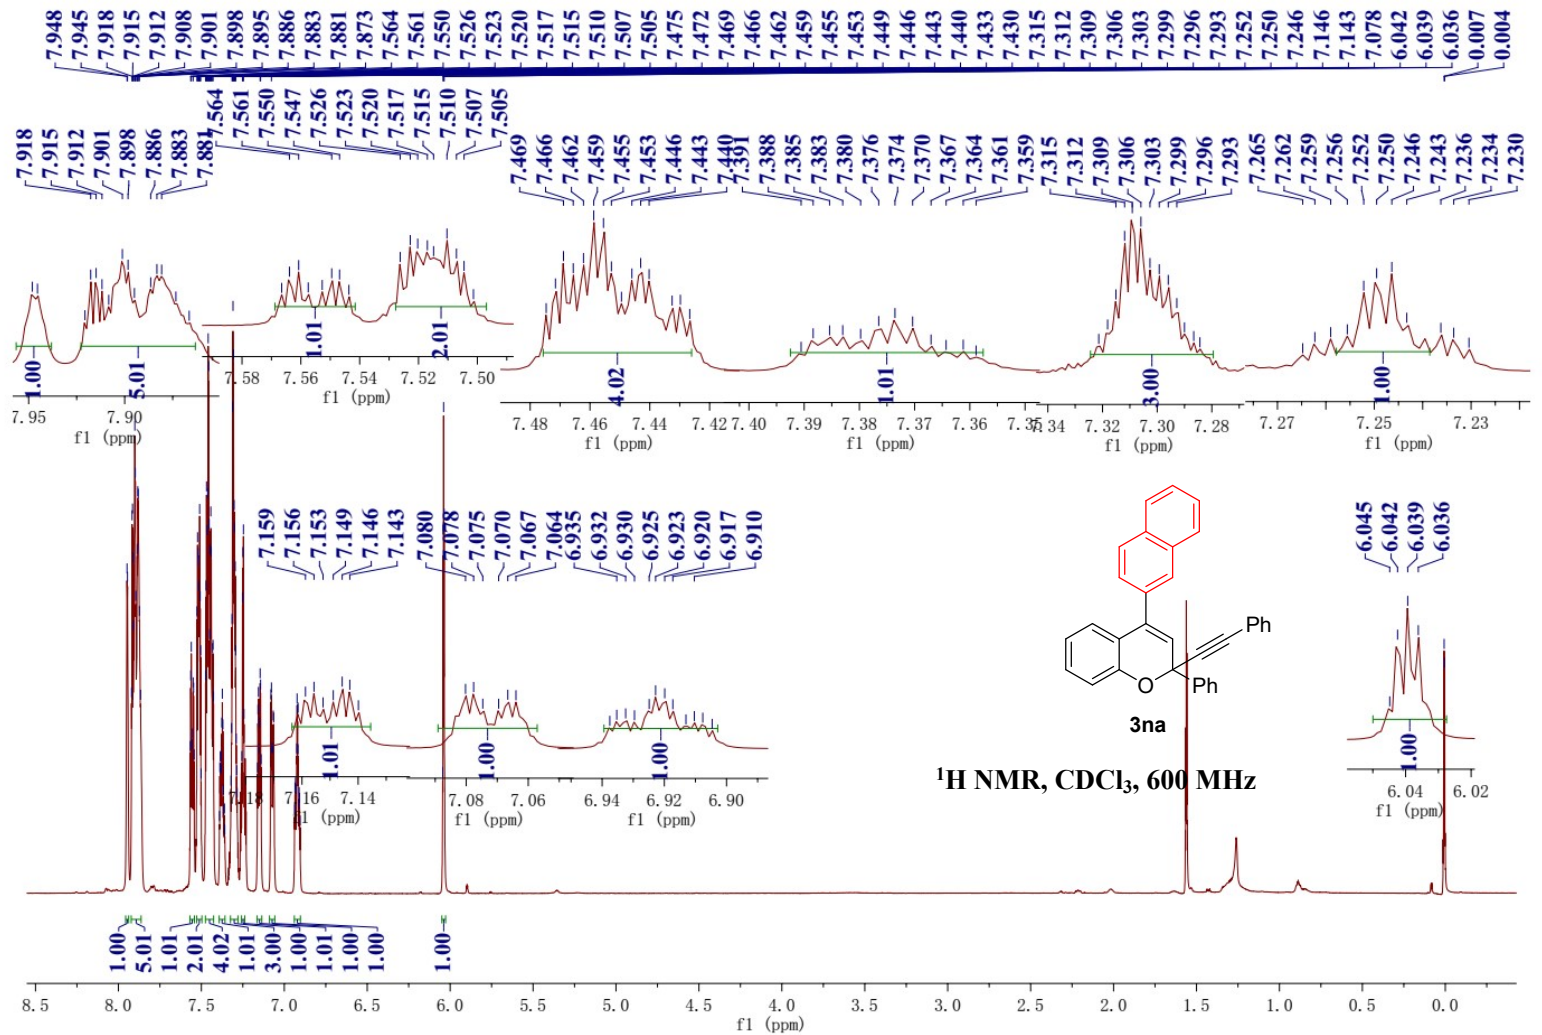



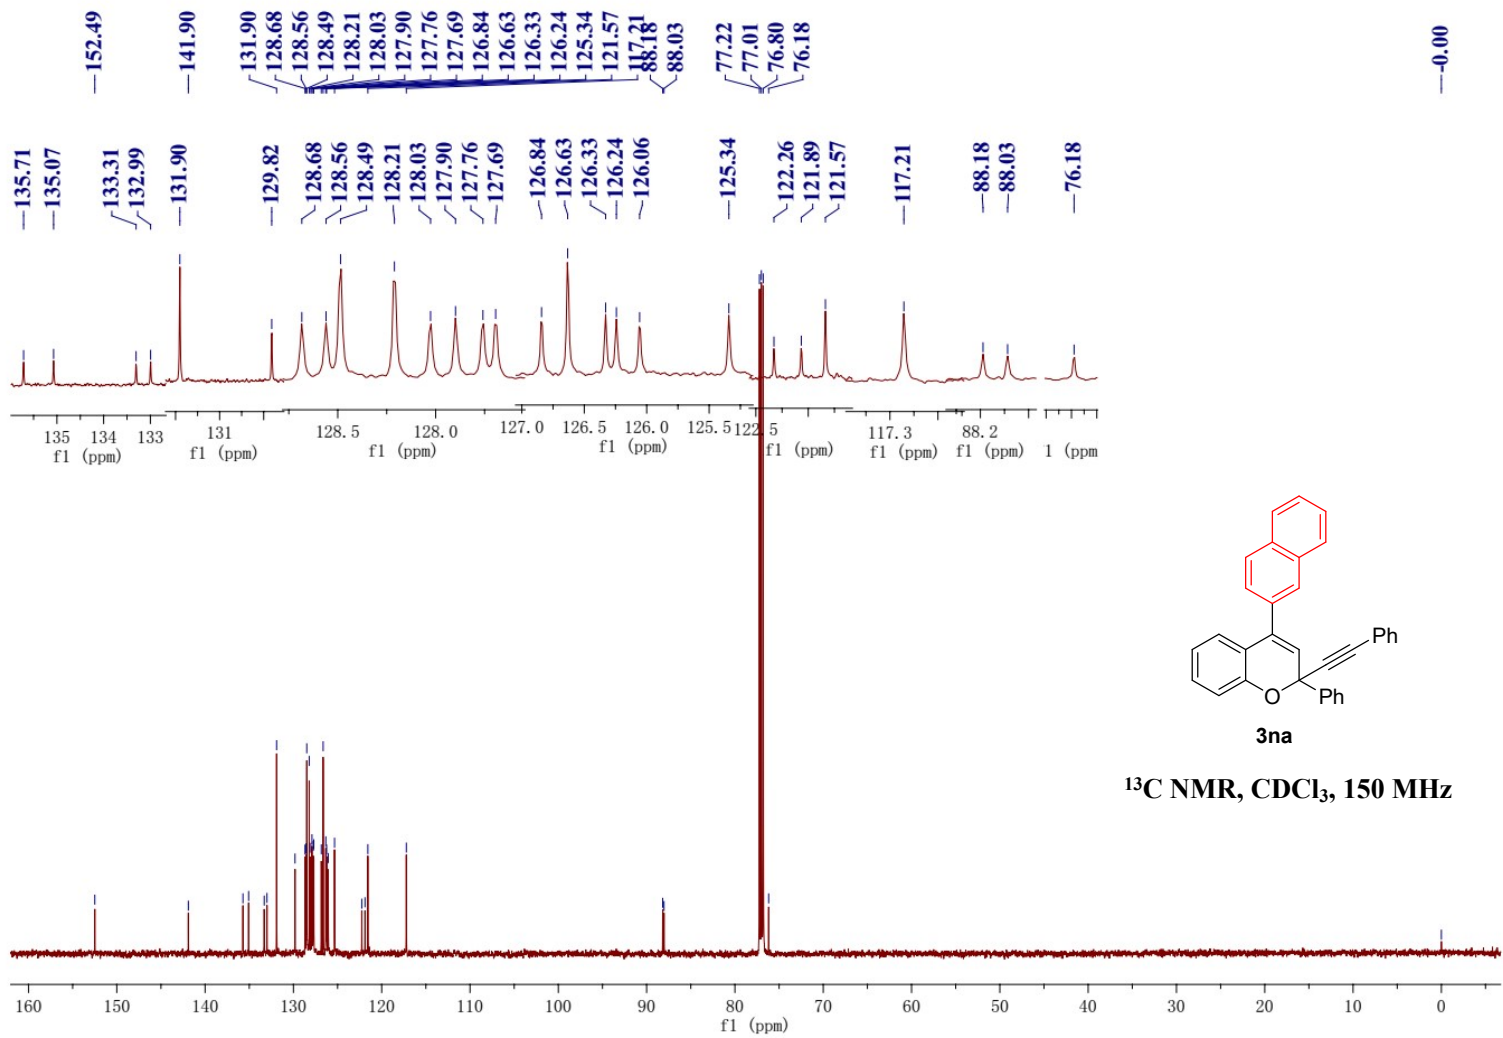

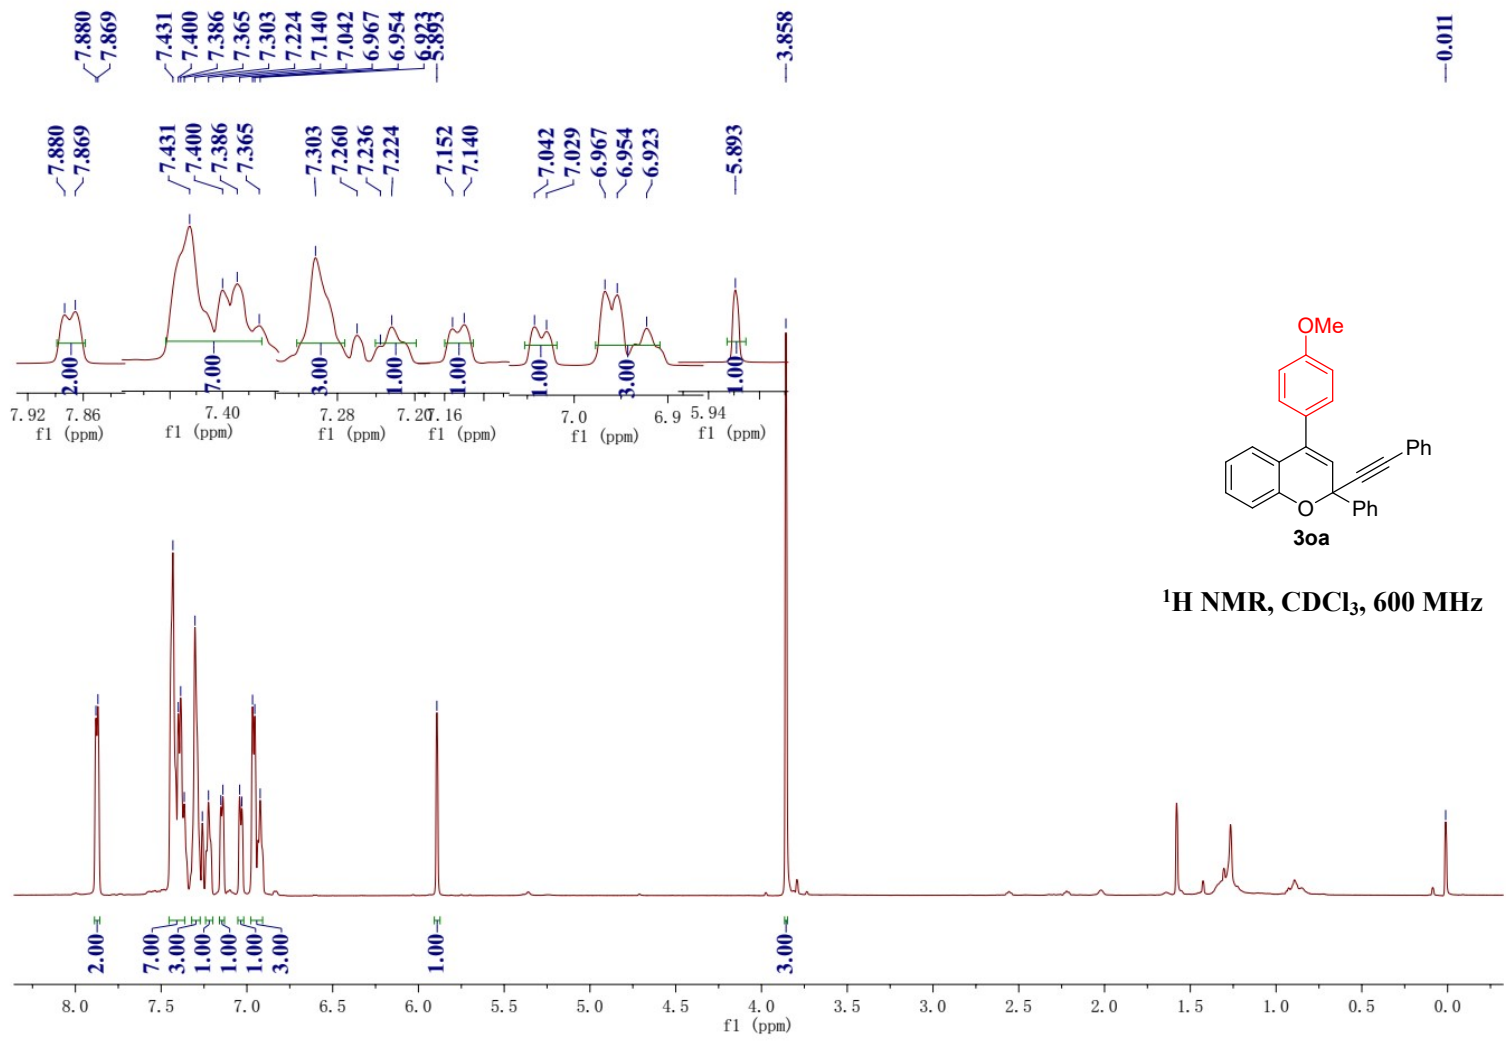

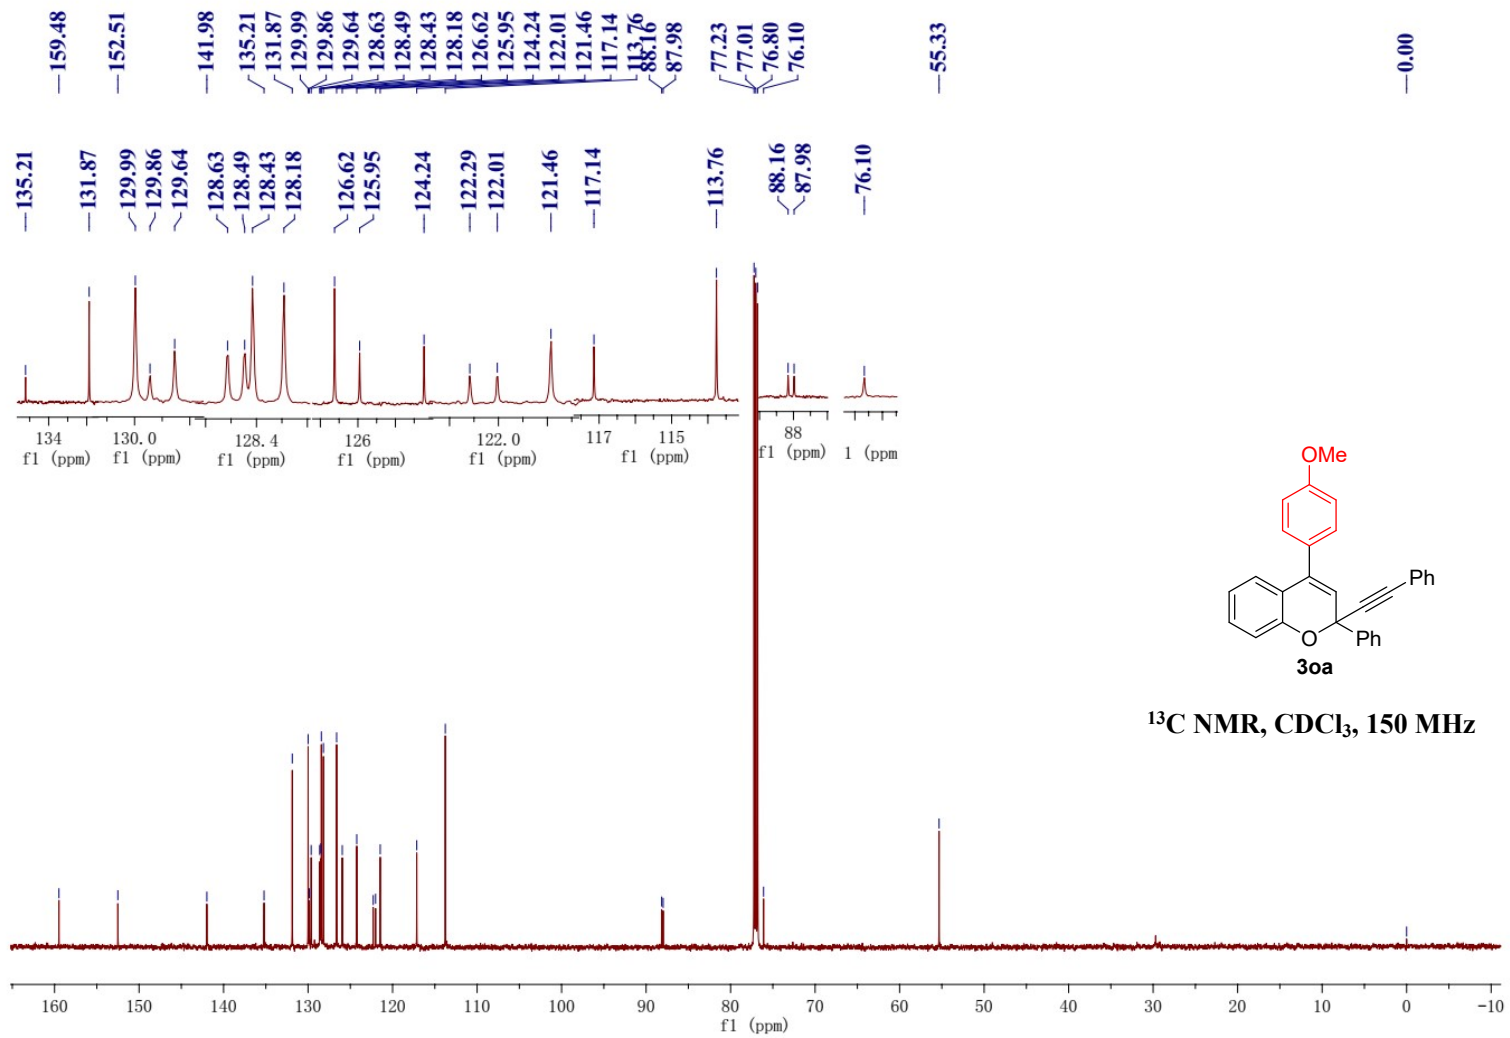

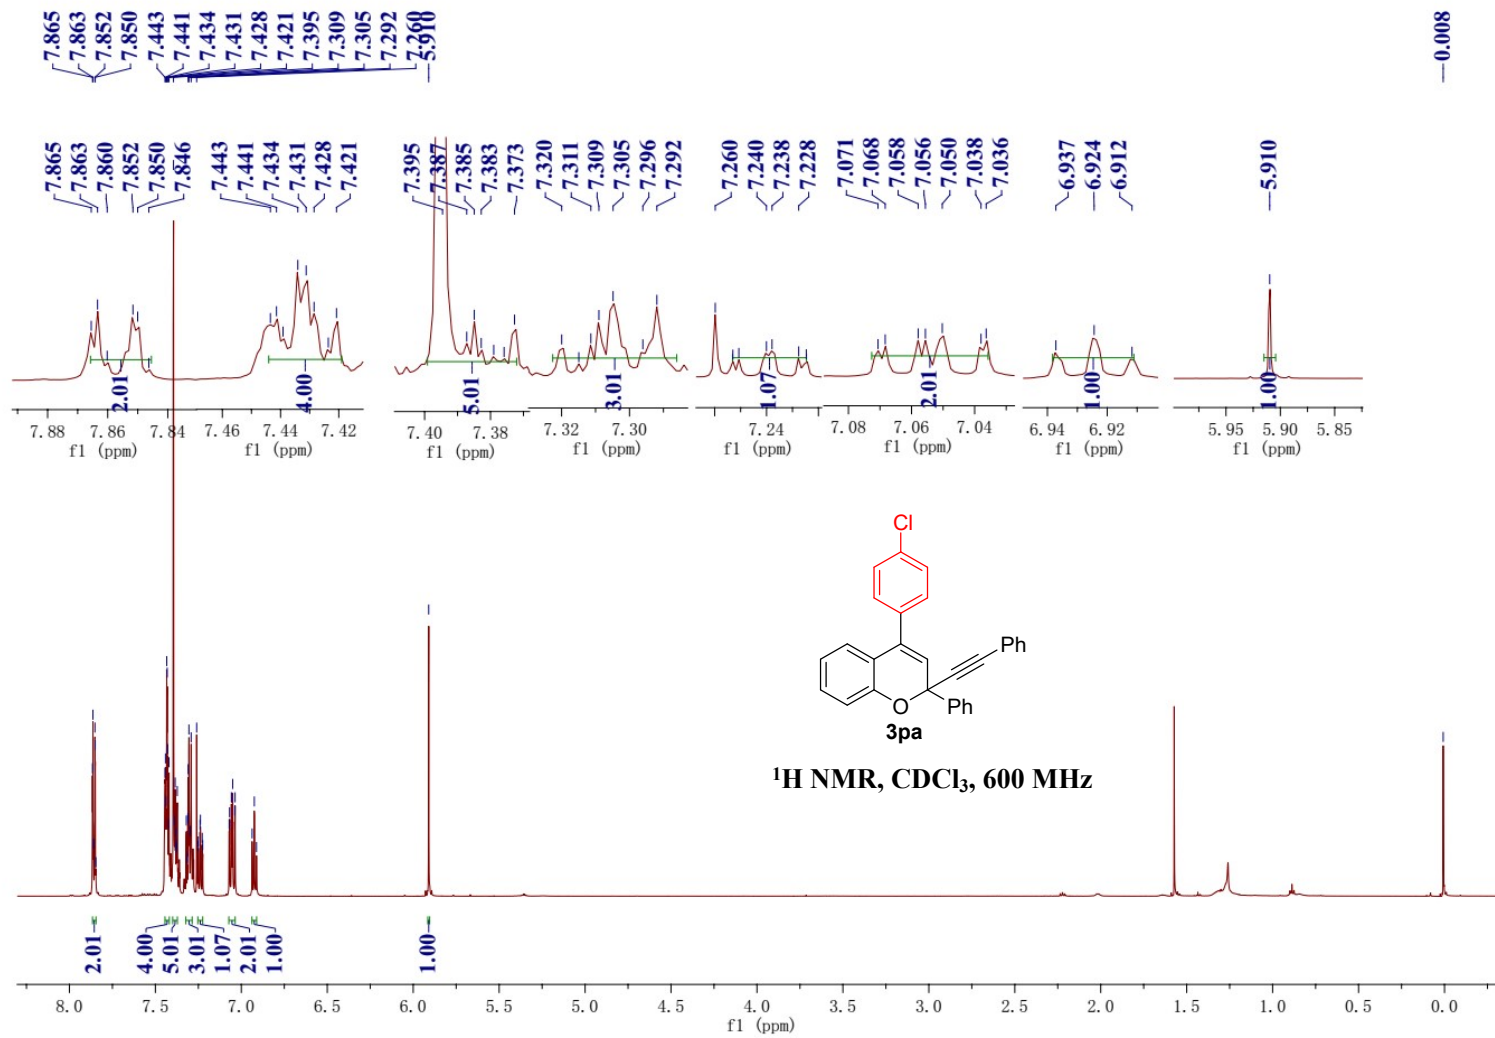

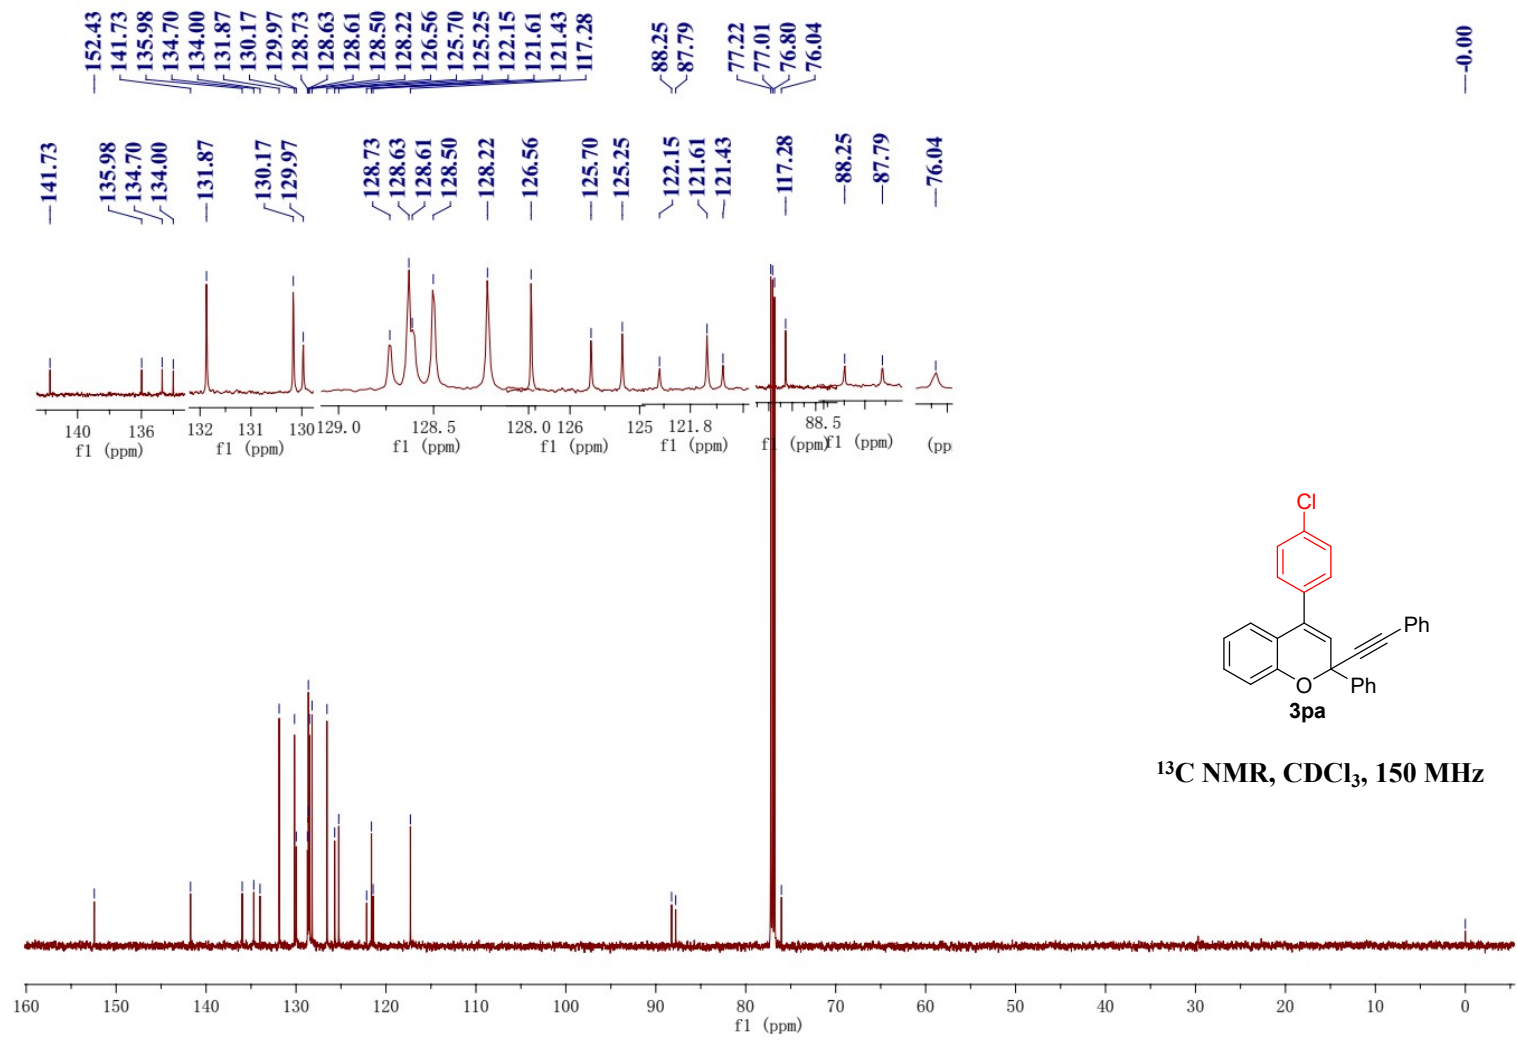

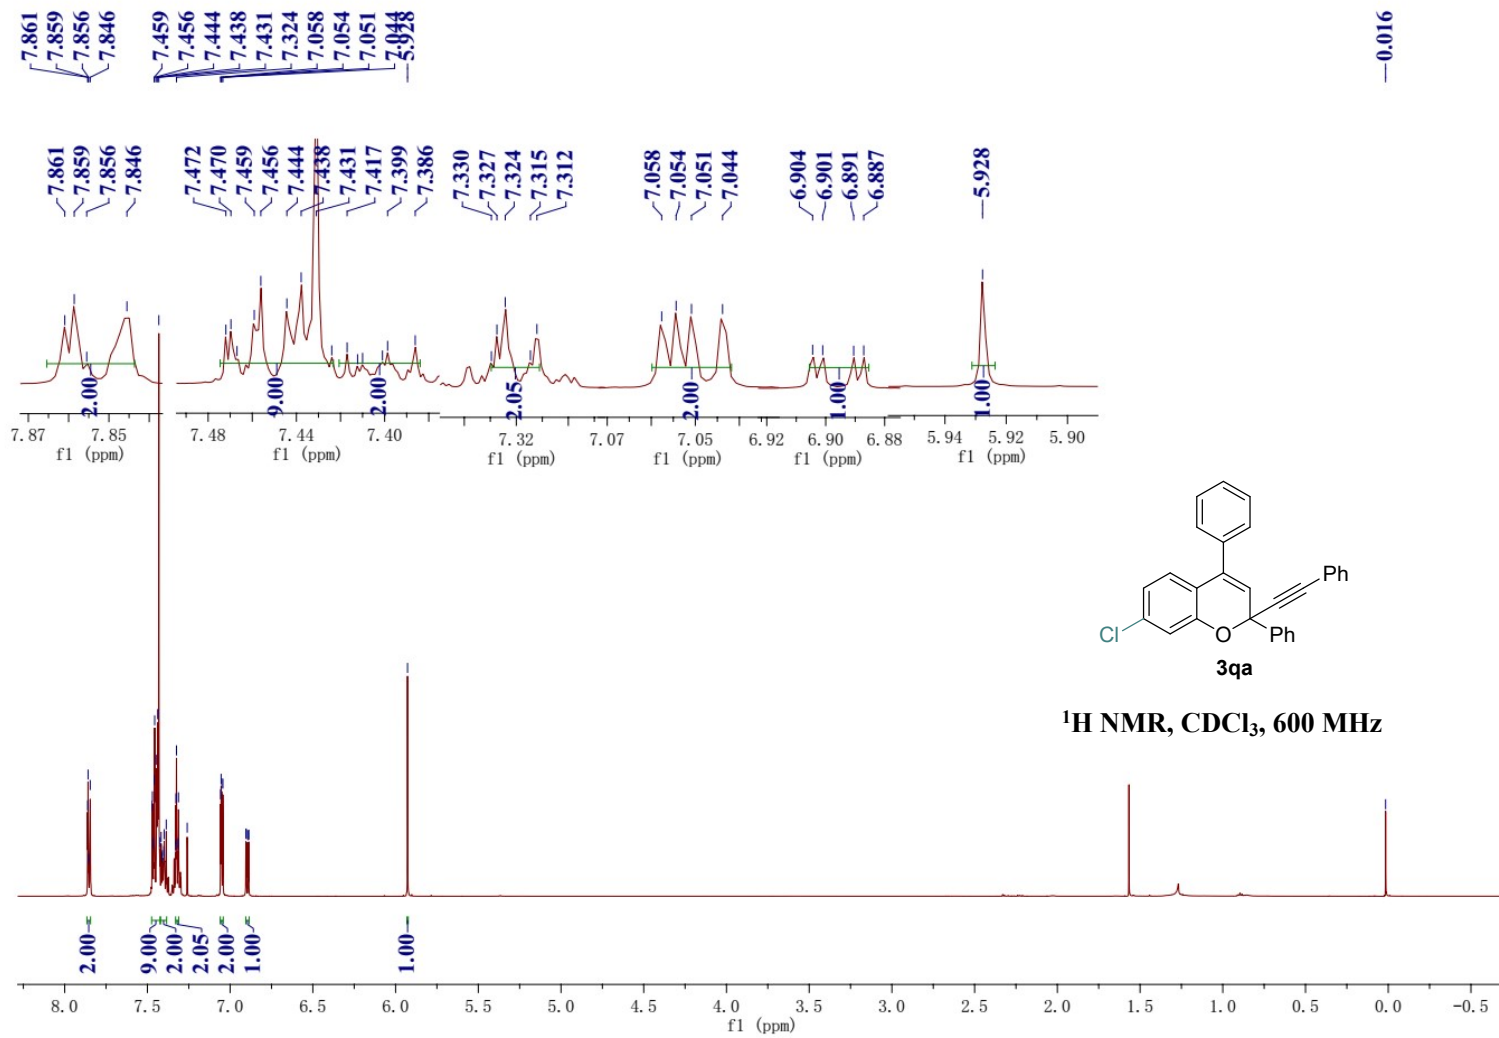

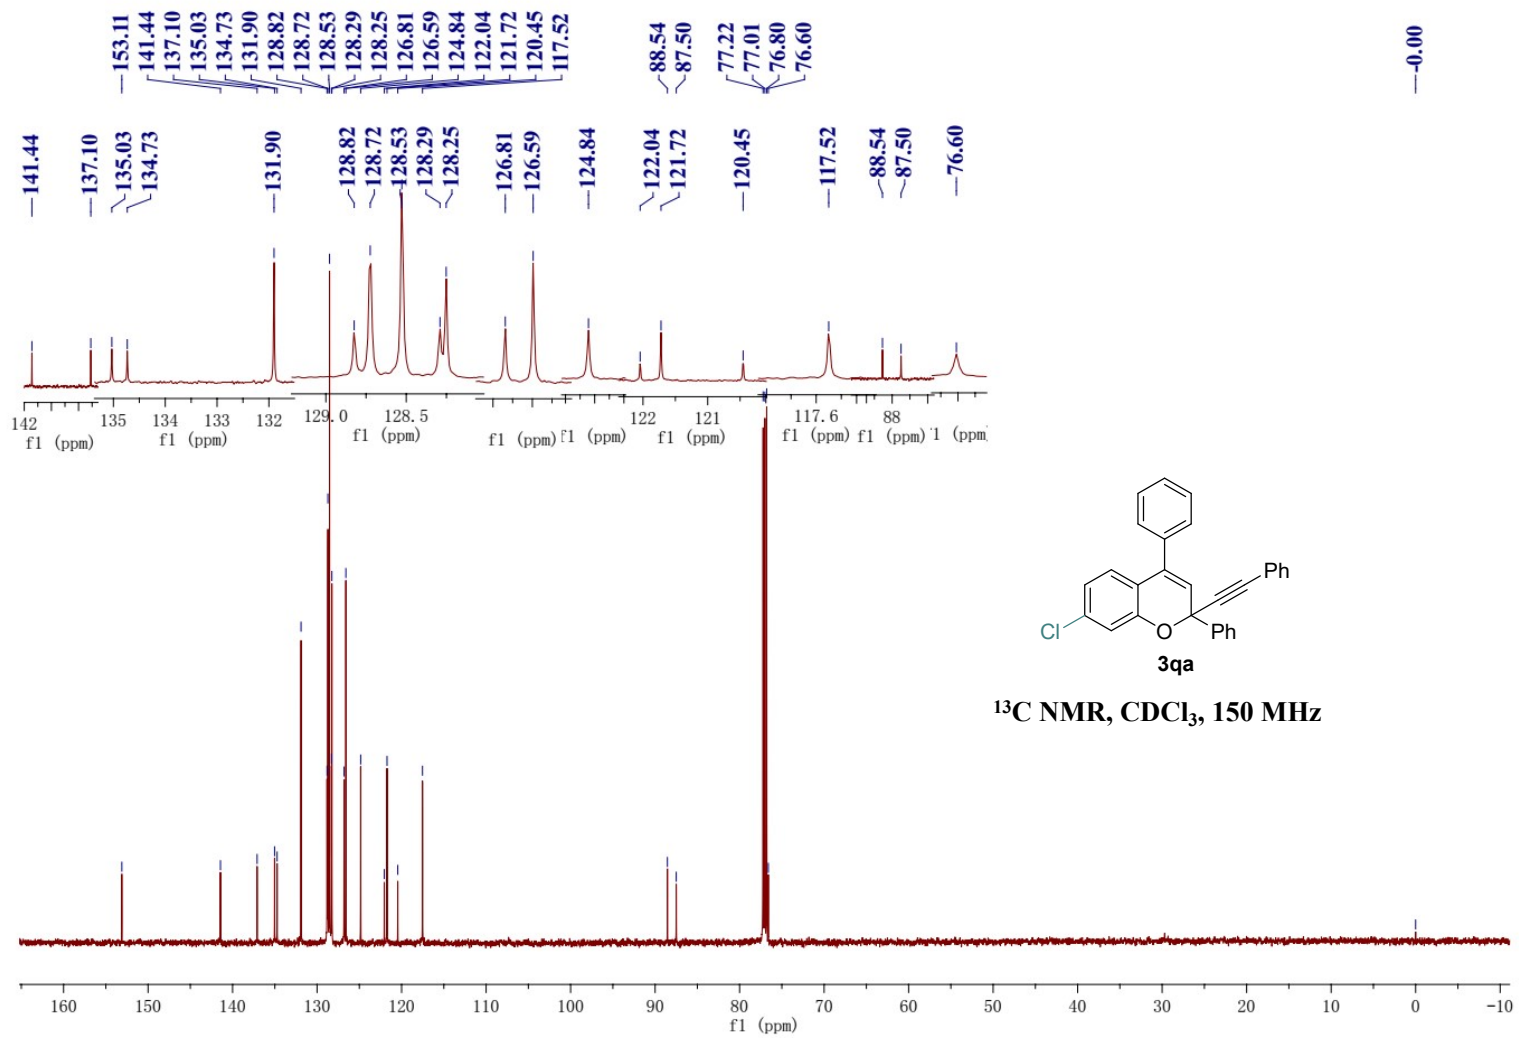

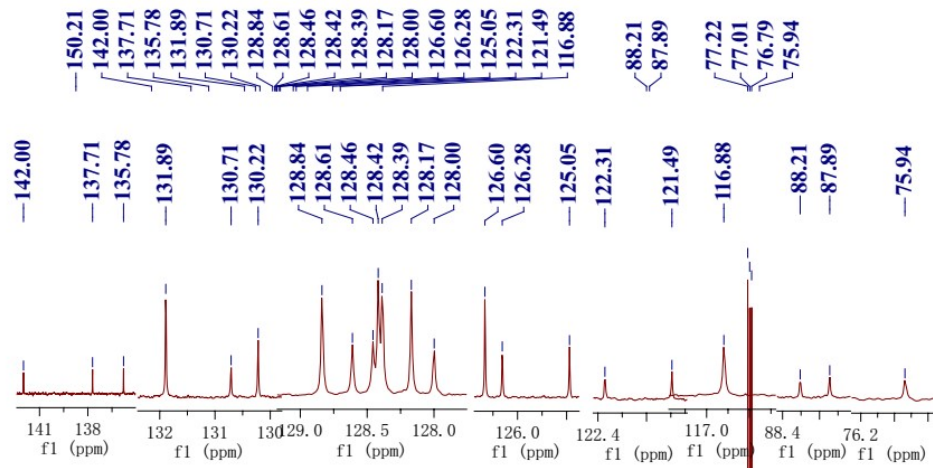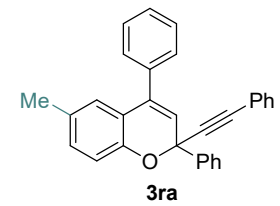

<sup>1</sup>H NMR, CDCl<sub>3</sub>, 600 MHz

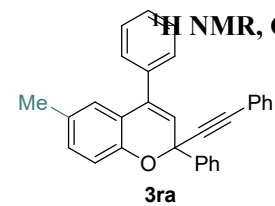

<sup>13</sup>H NMR, CDCl<sub>3</sub>, 150 MHz

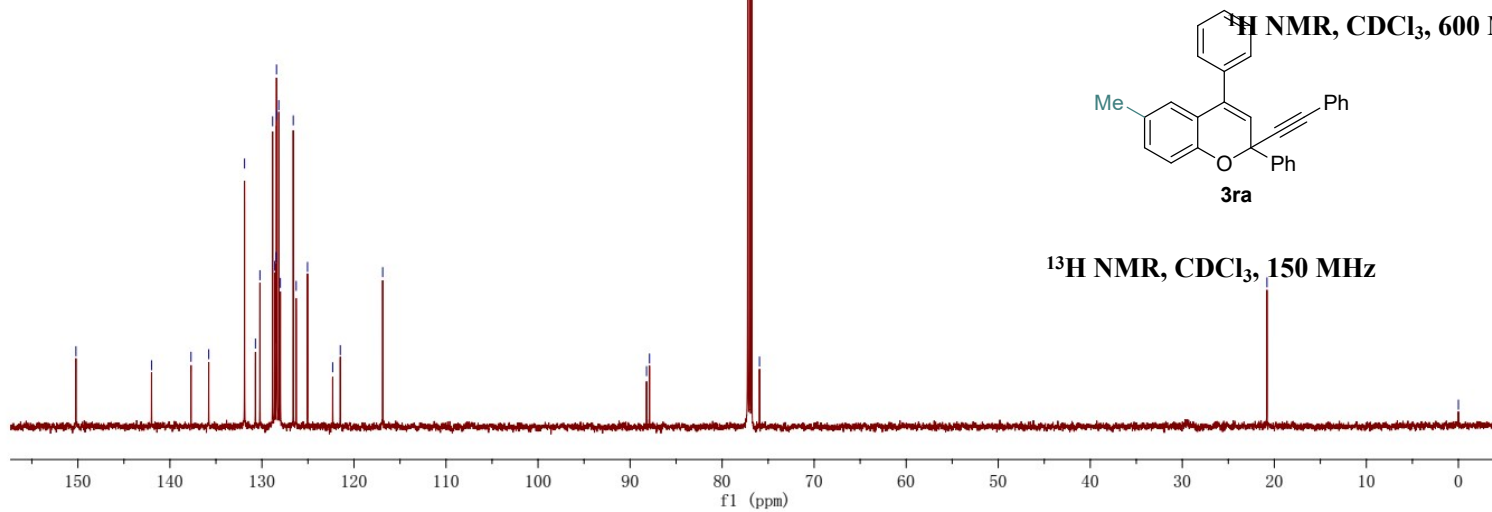



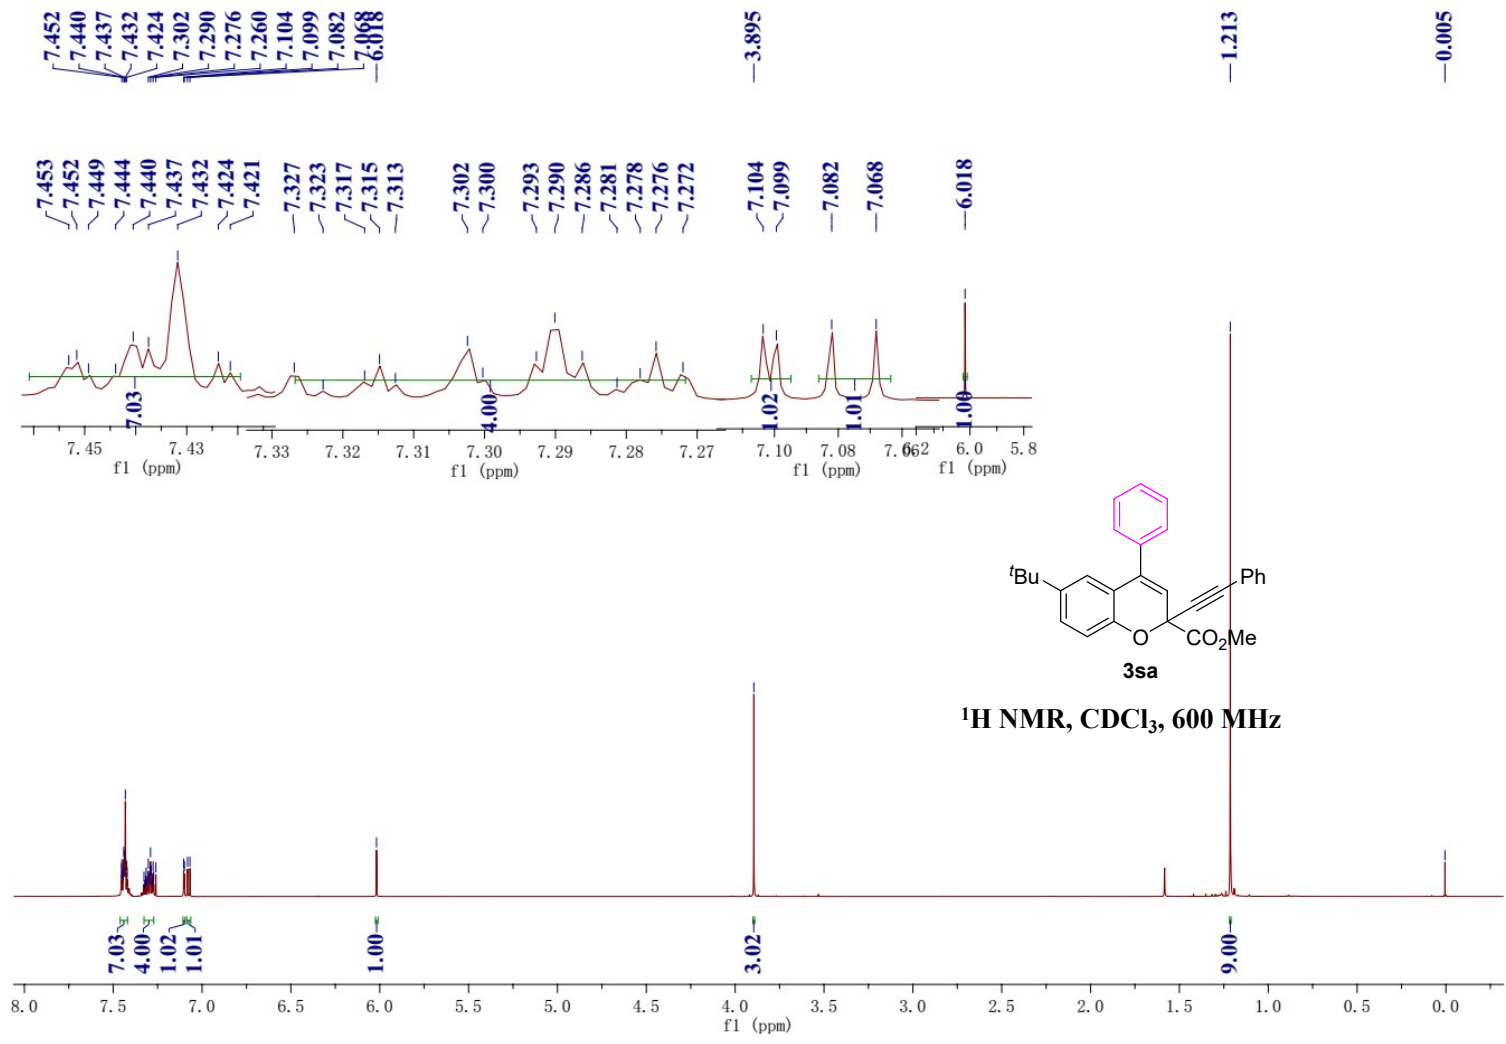

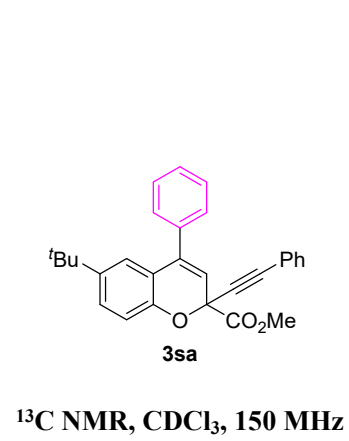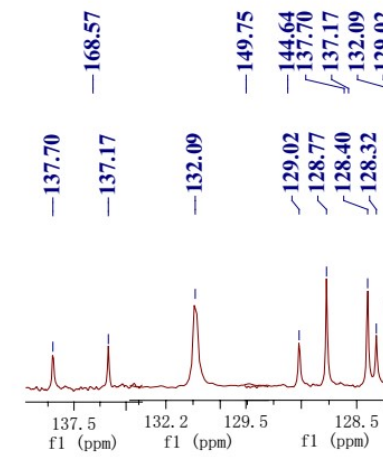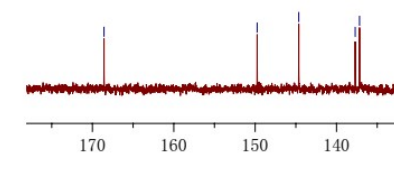



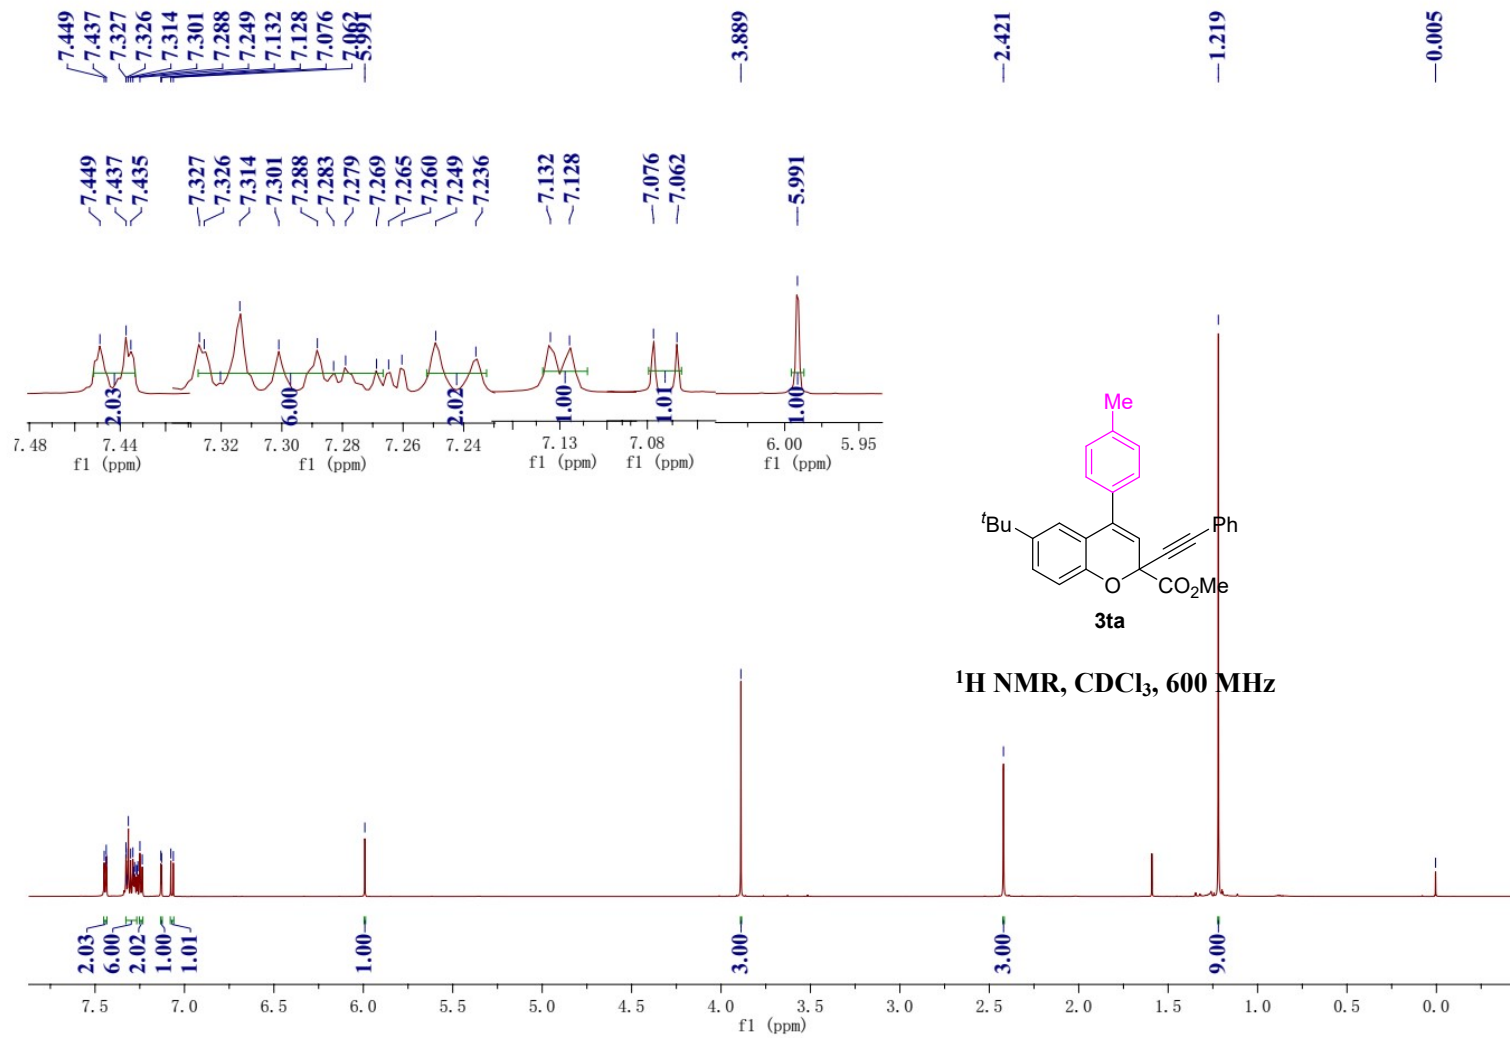

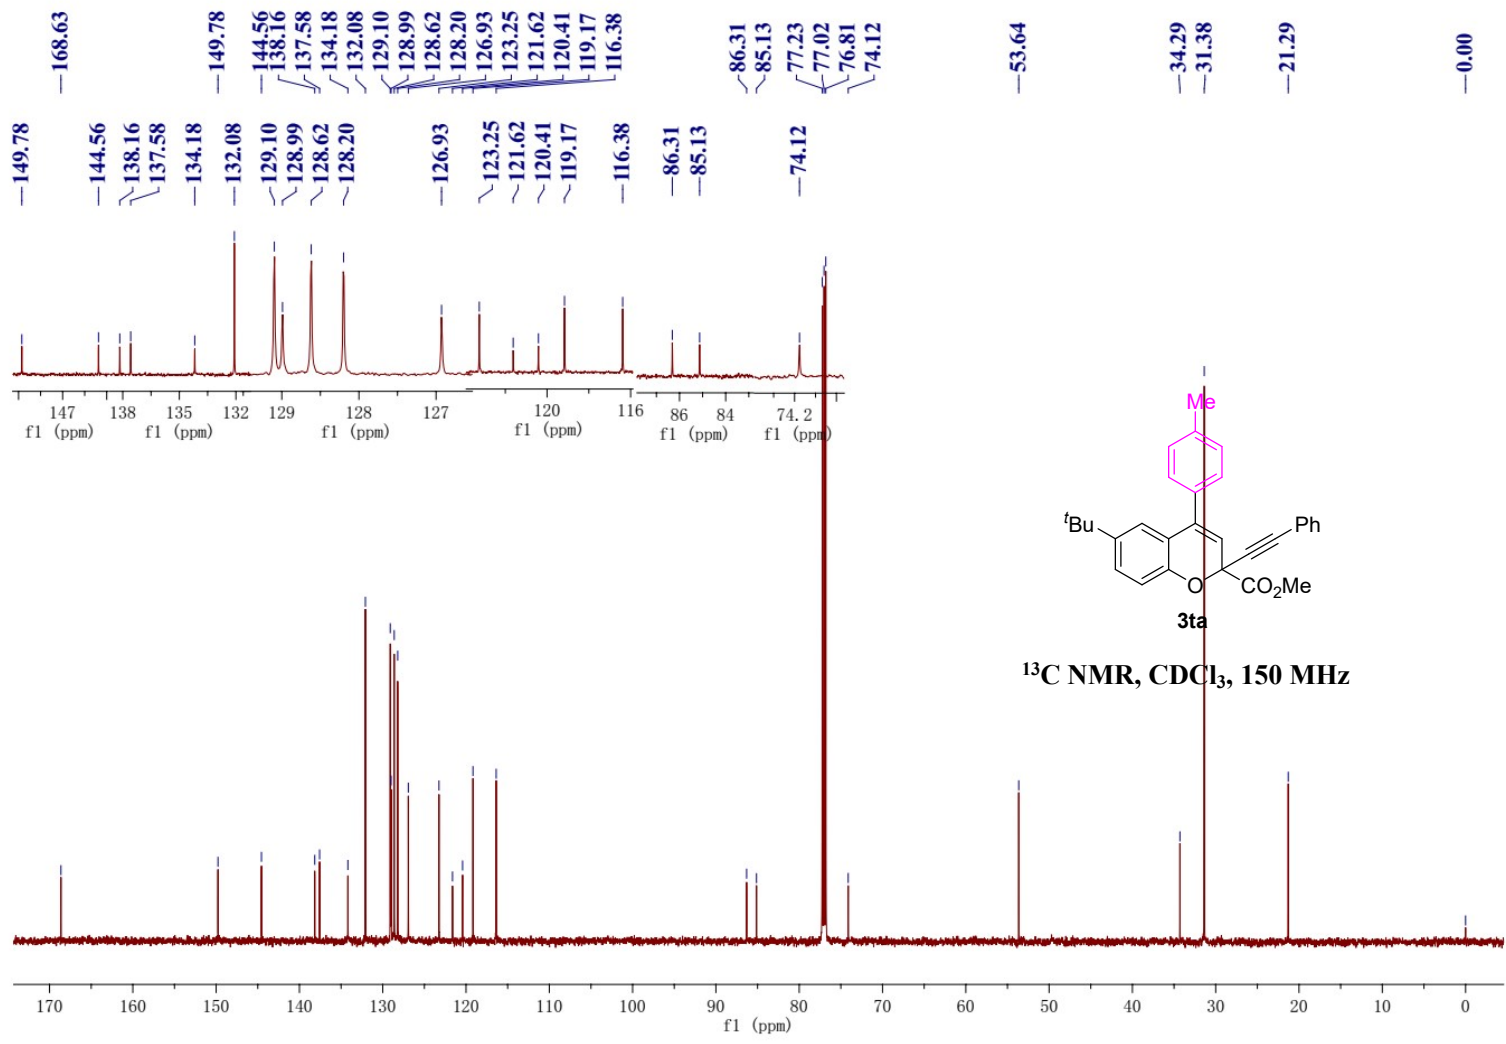

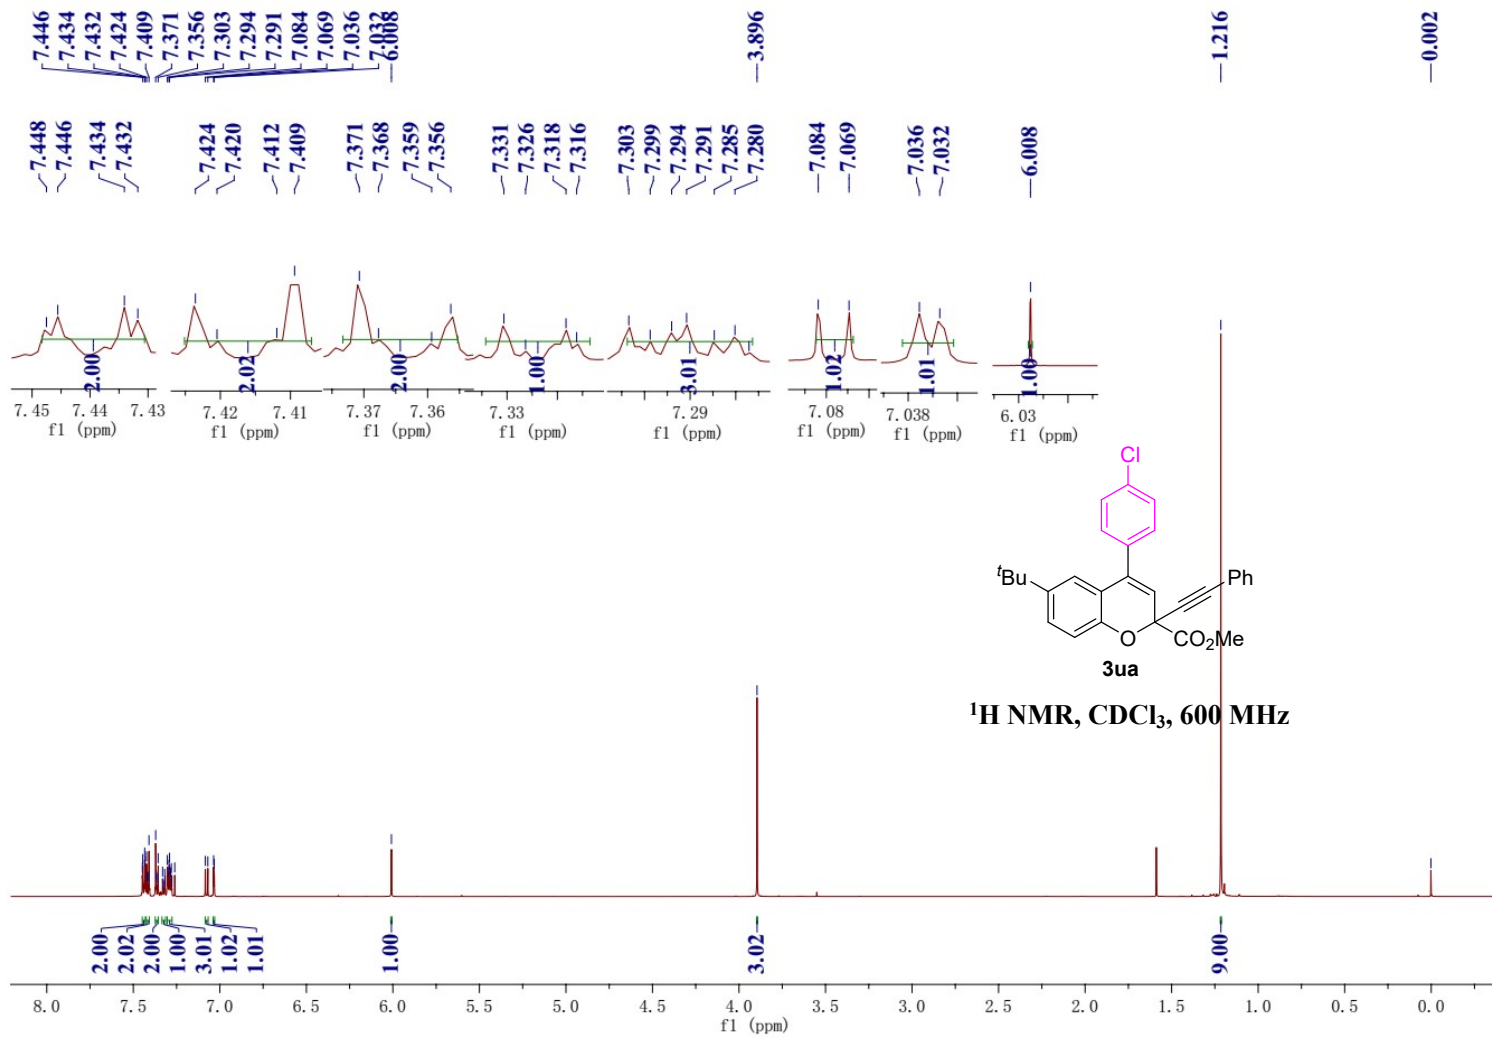

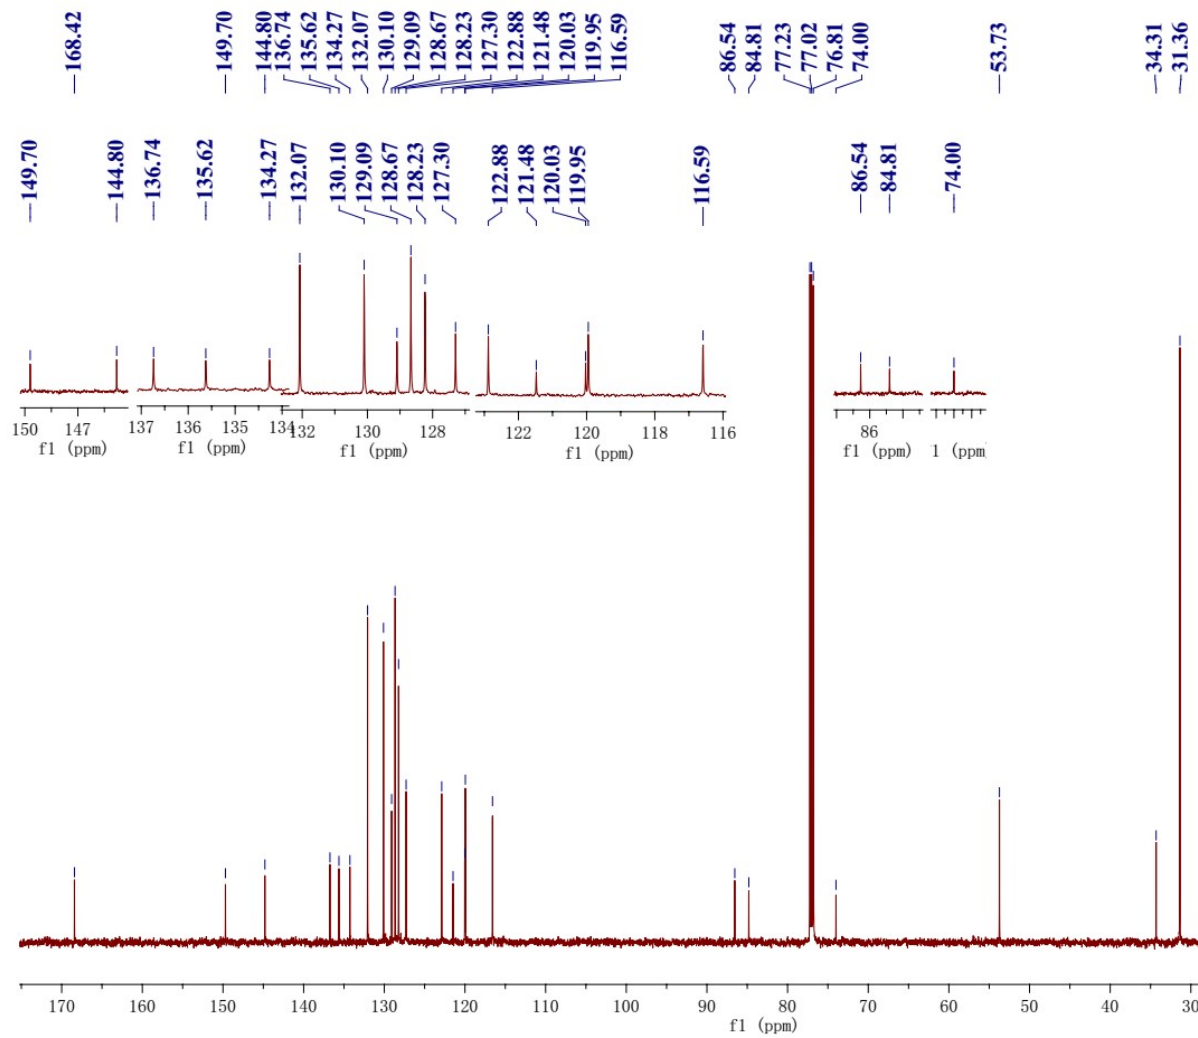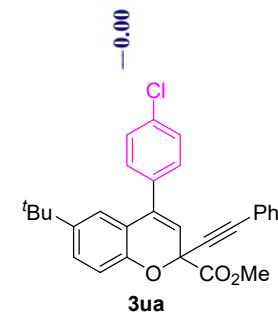

$^{13}\text{C}$  NMR,  $\text{CDCl}_3$ , 150 MHz

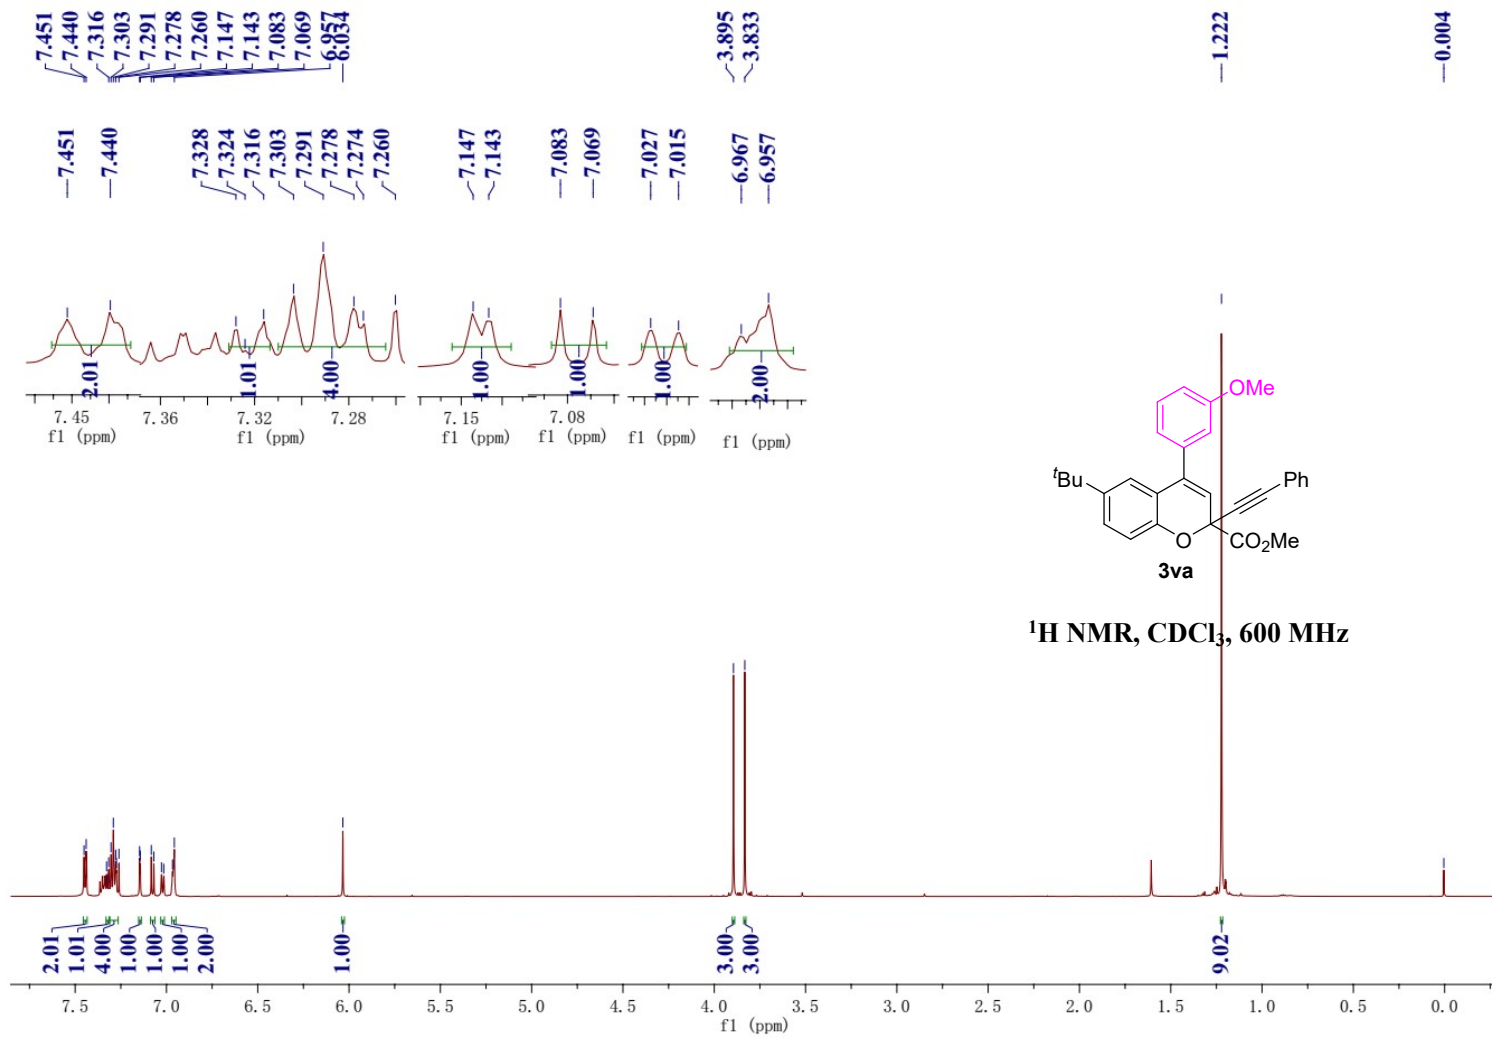



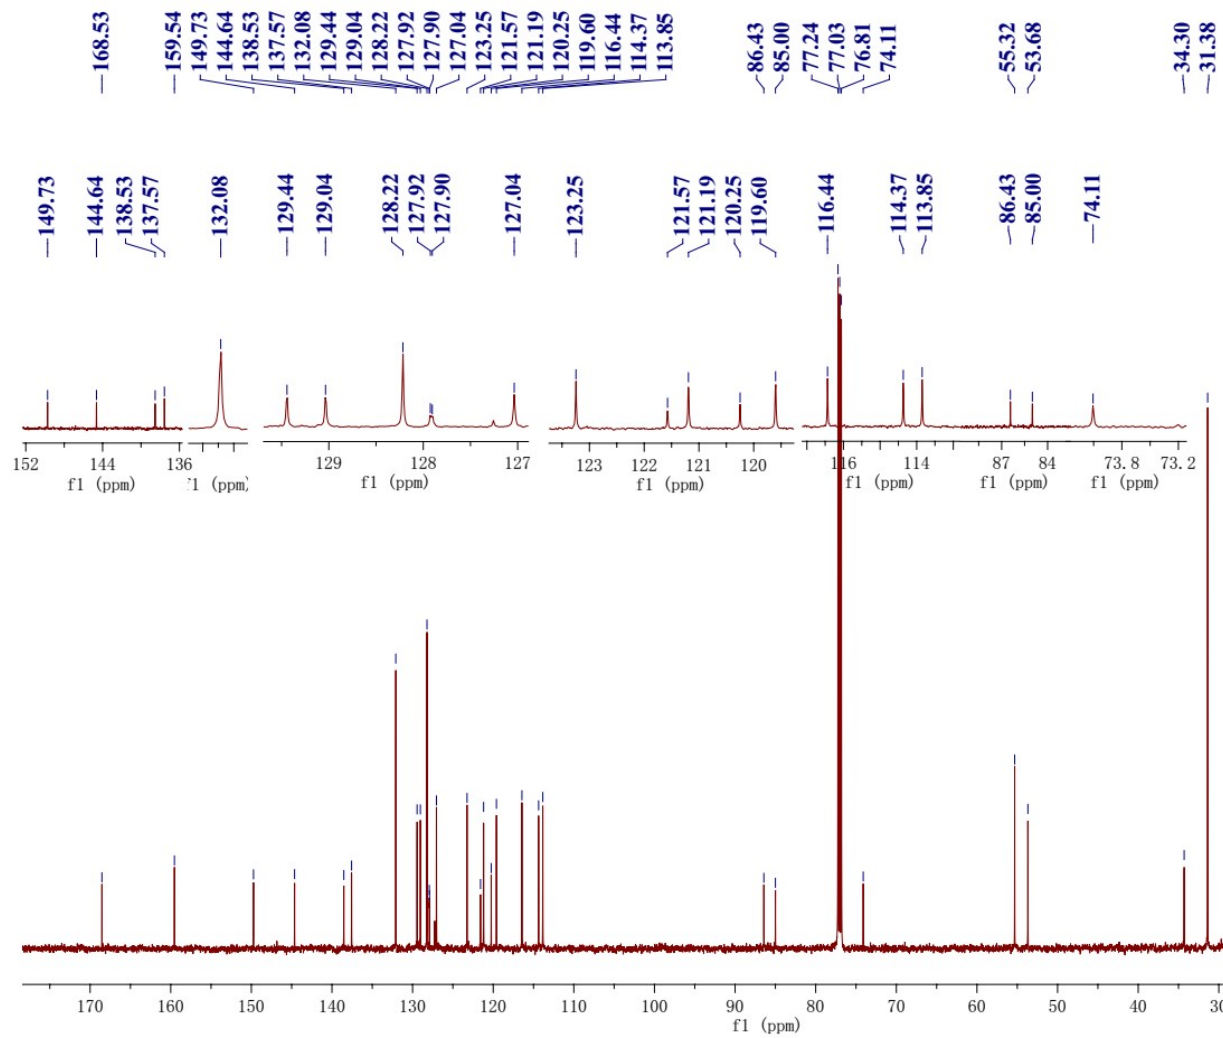

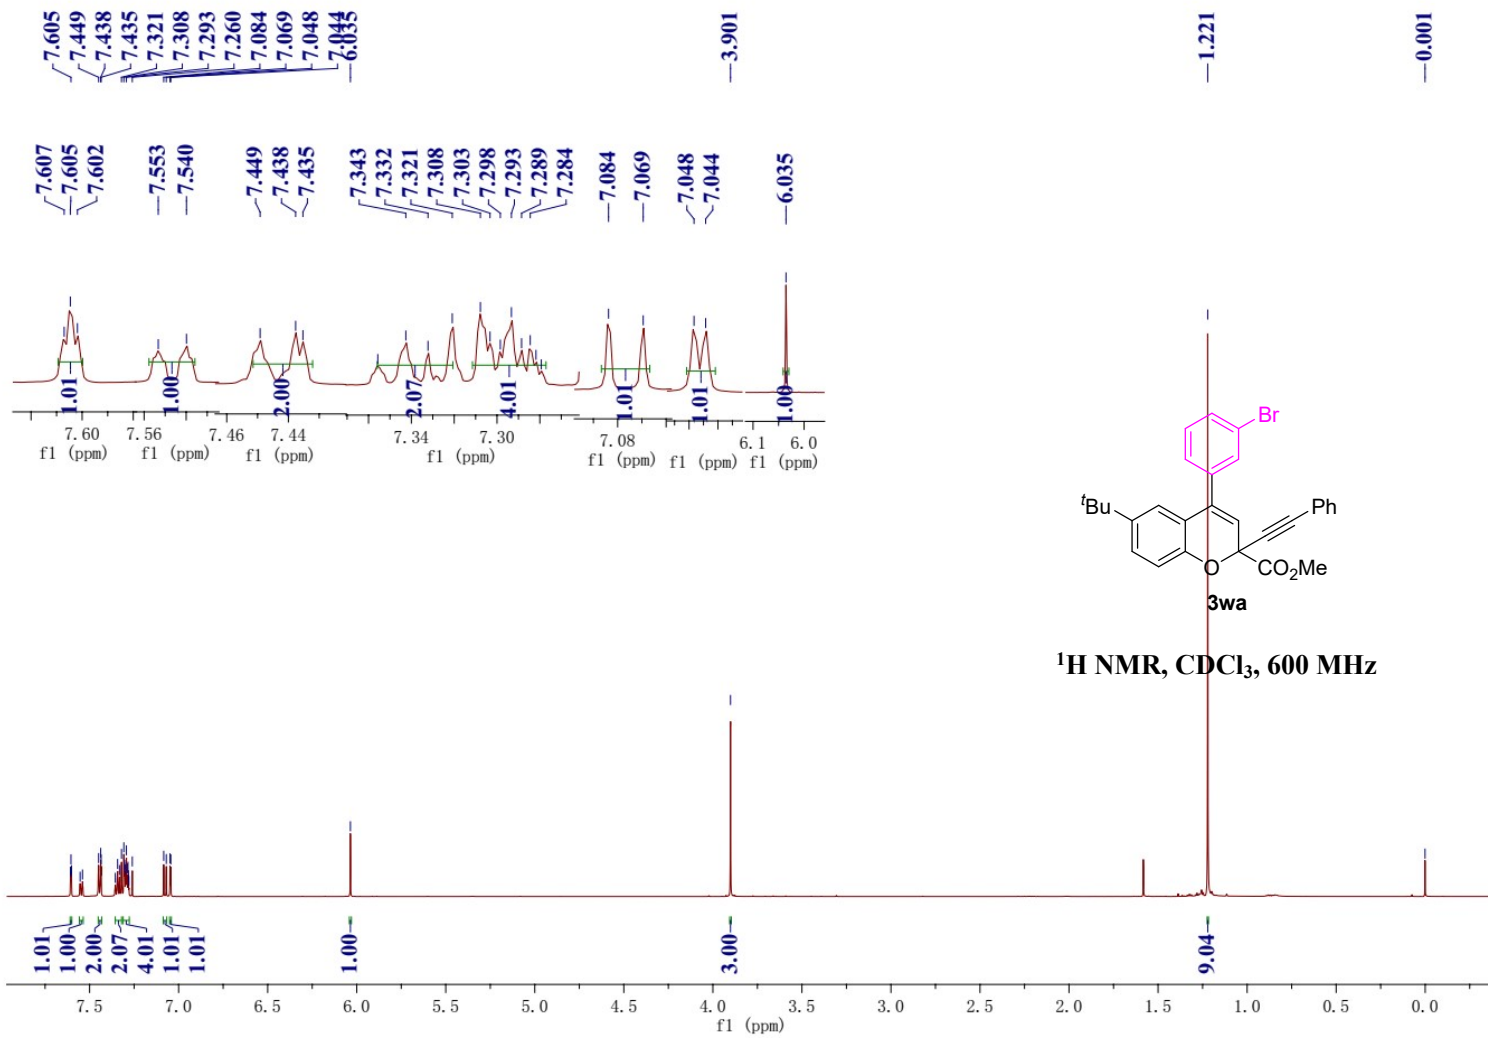

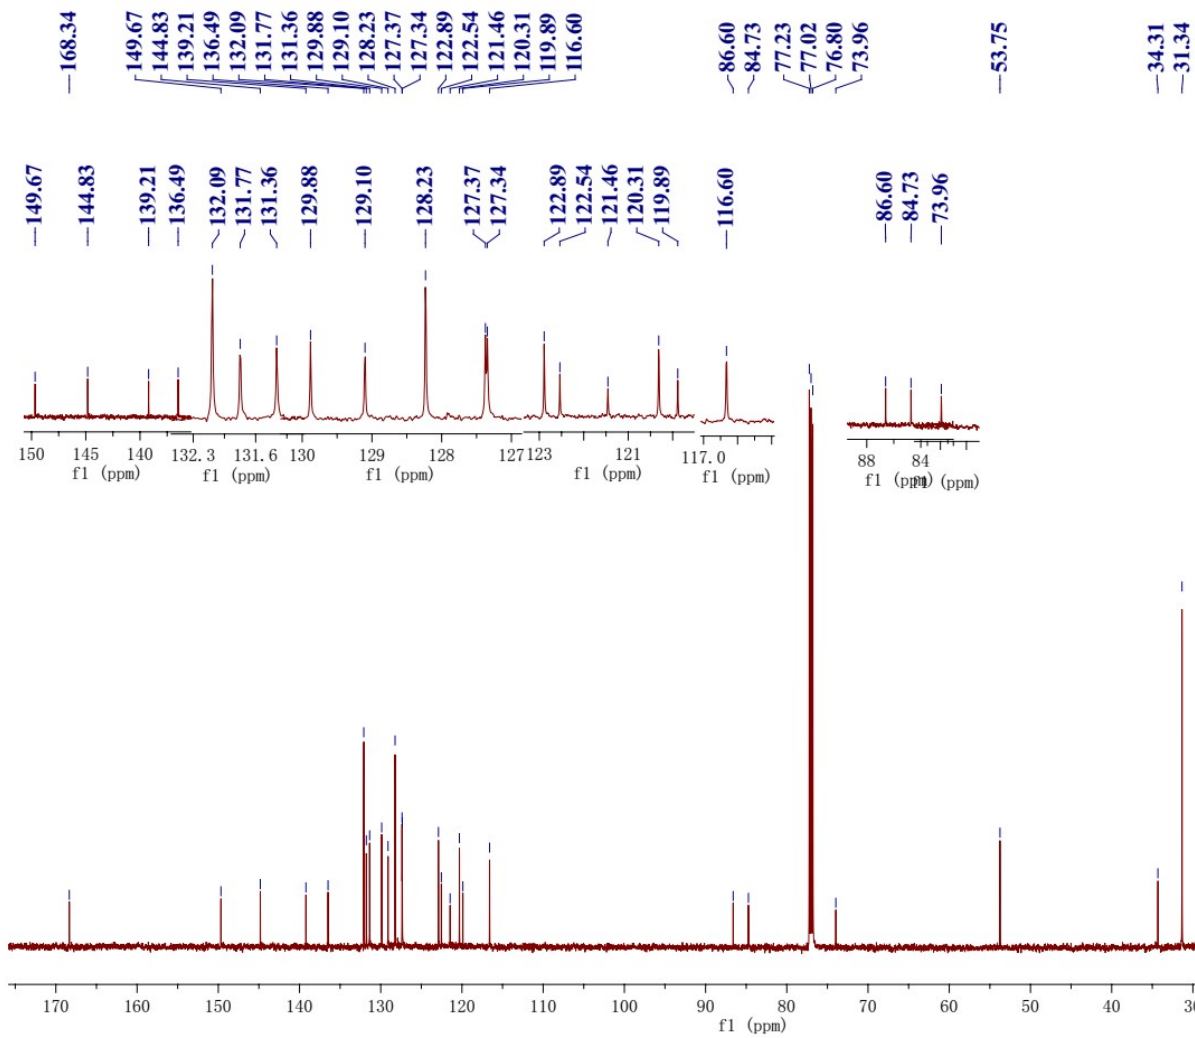

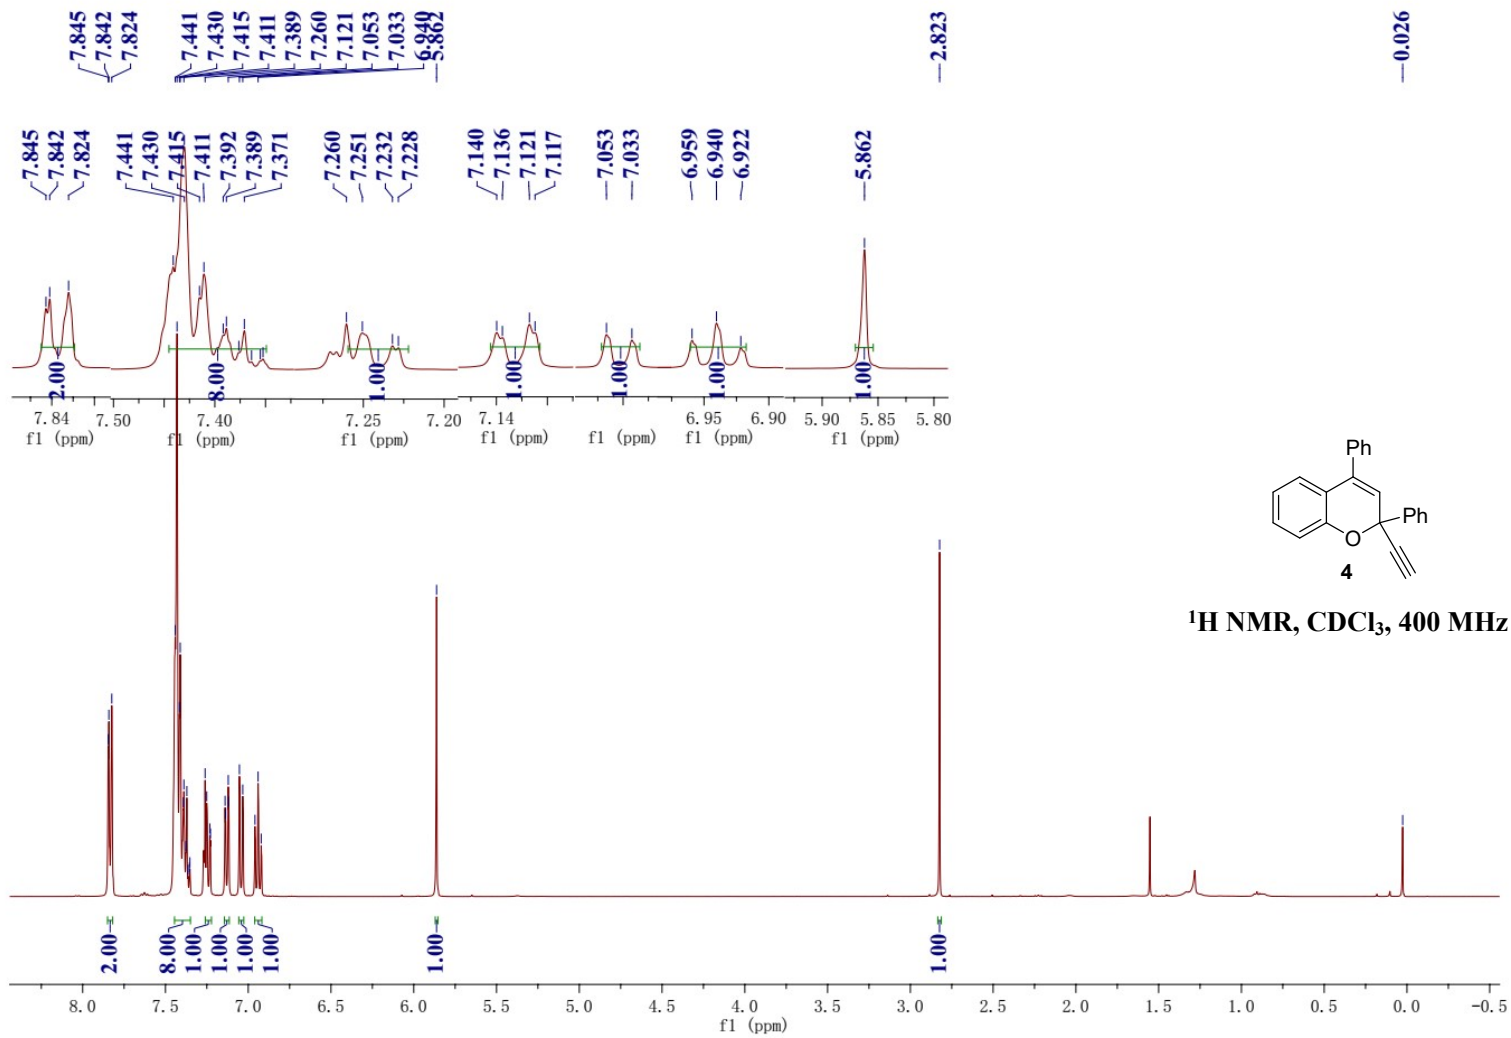

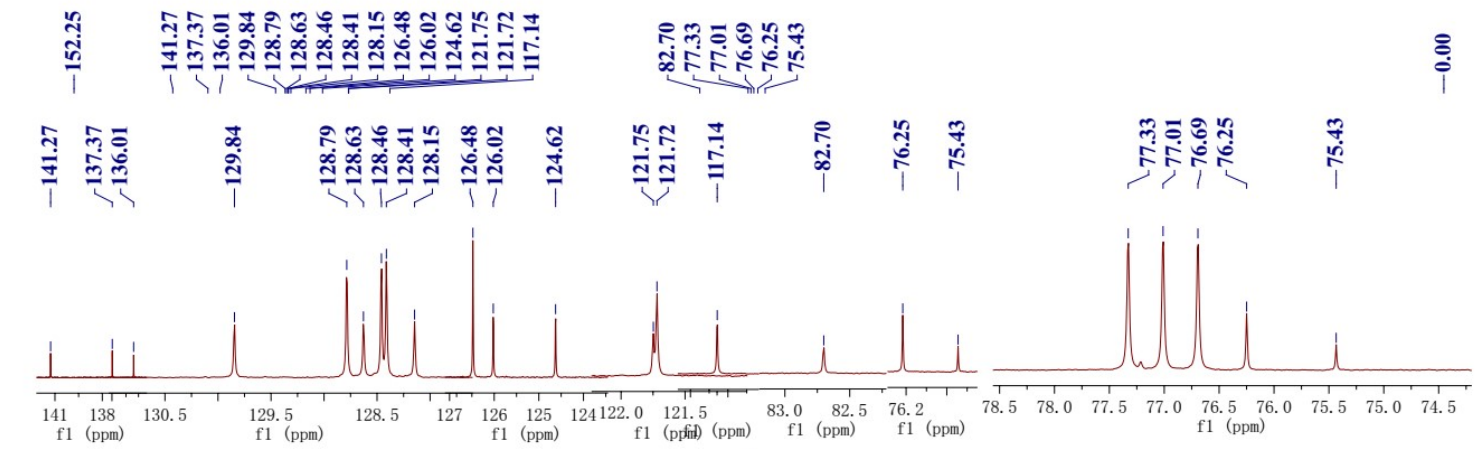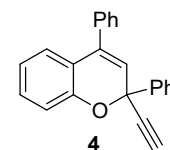

**<sup>13</sup>C NMR, CDCl<sub>3</sub>, 100 MHz**

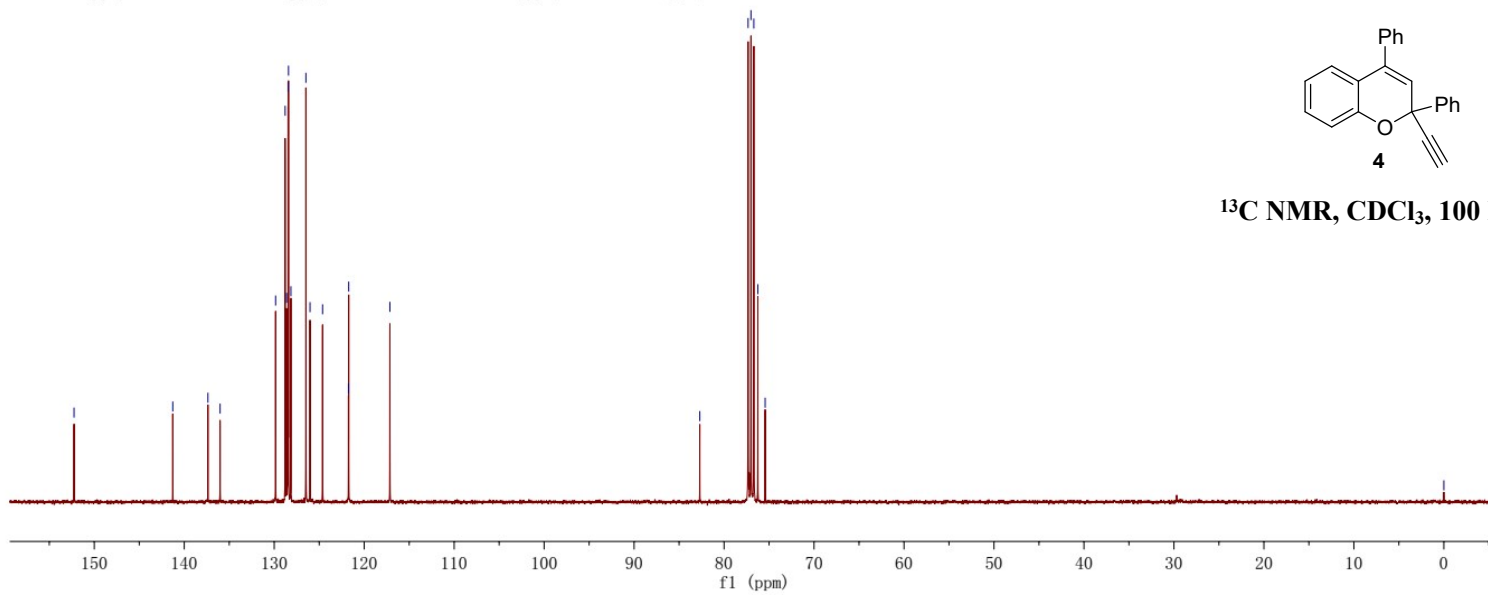

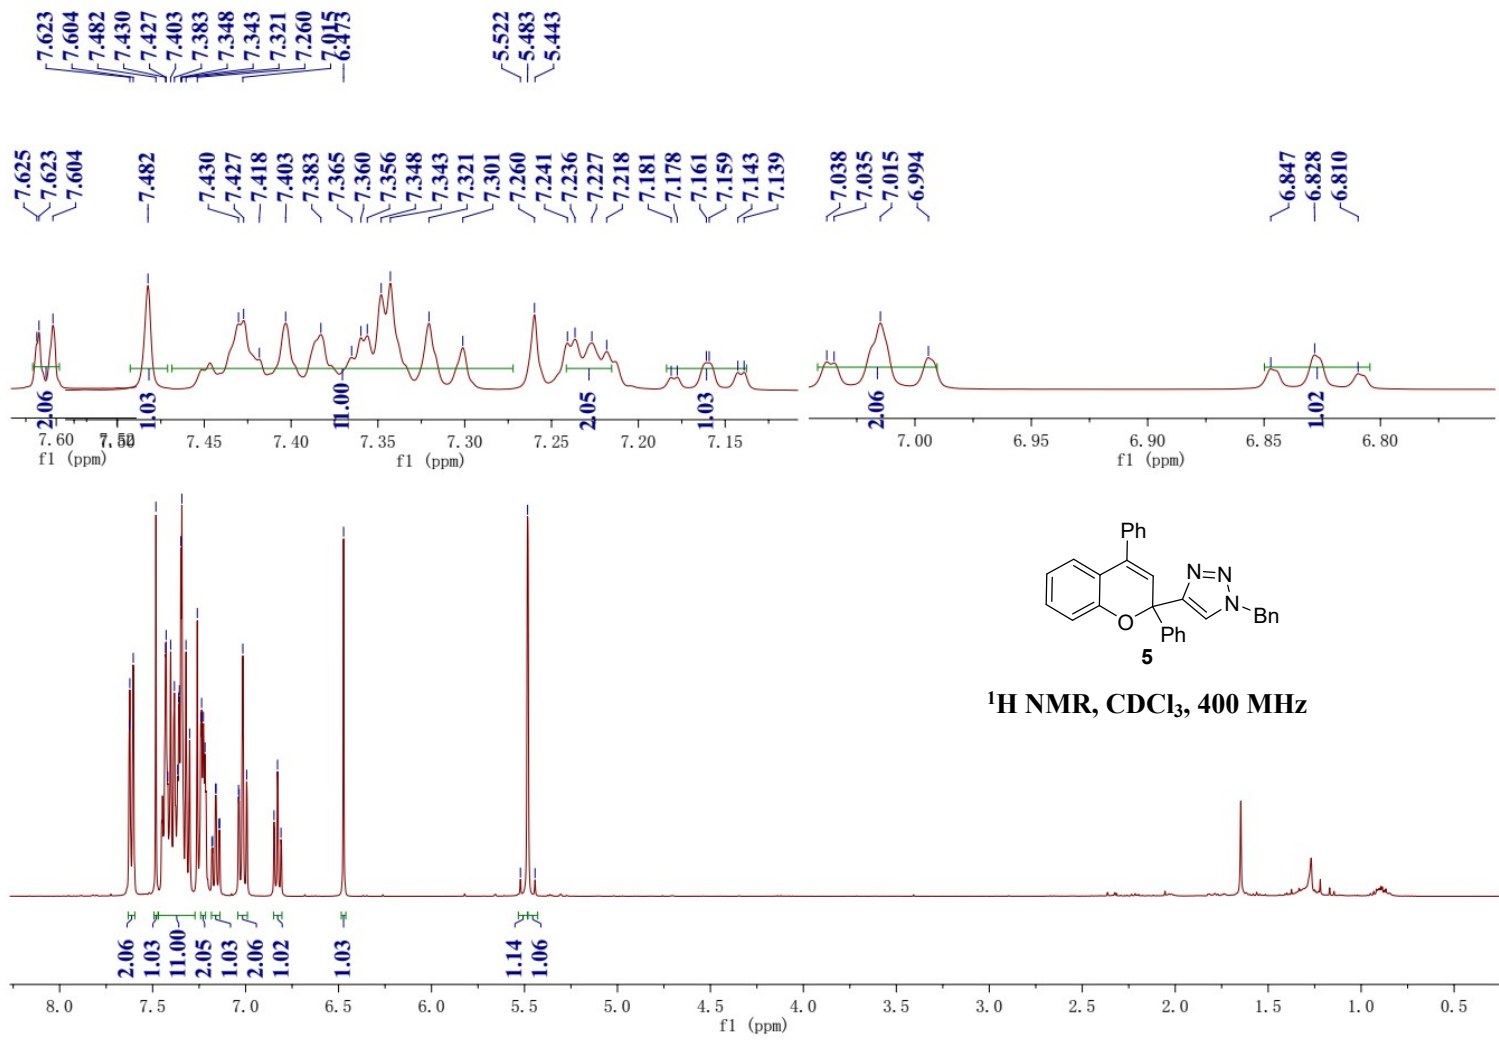

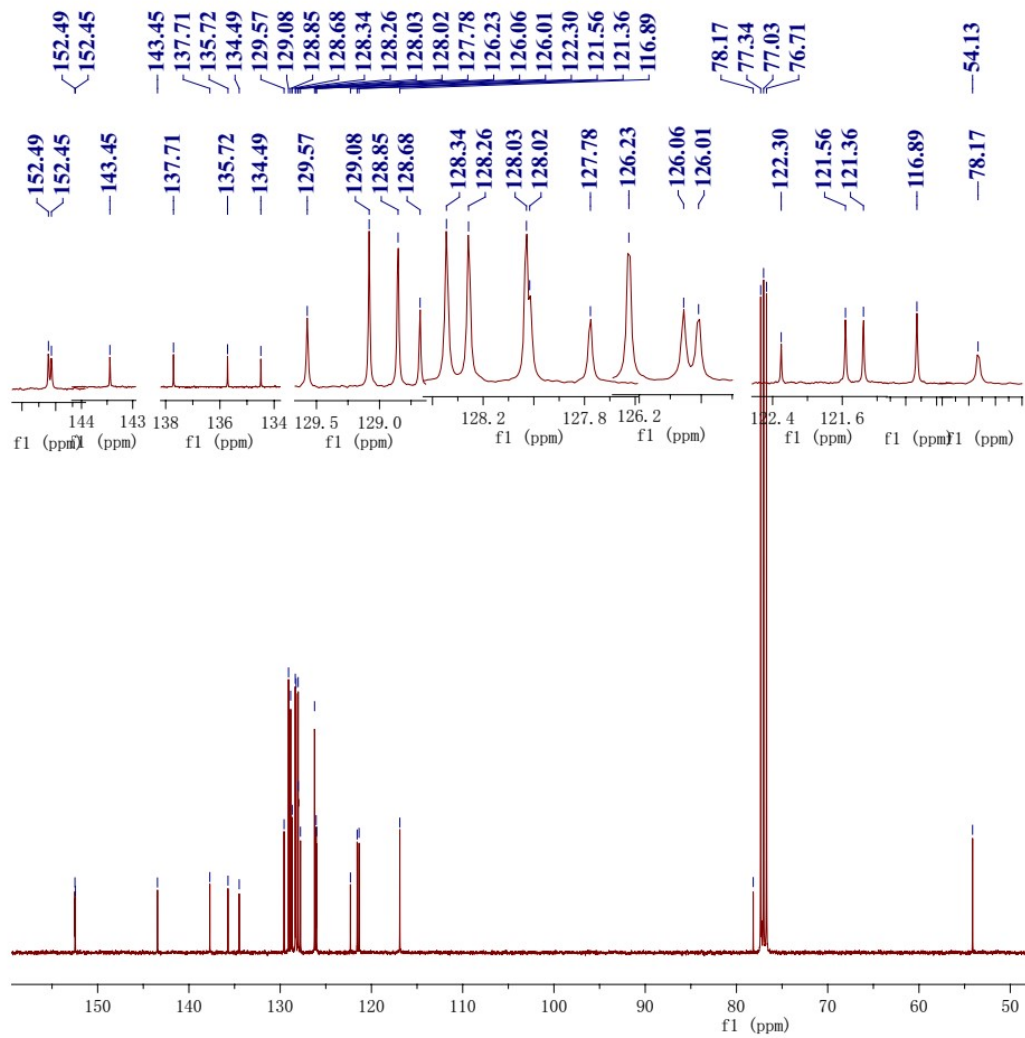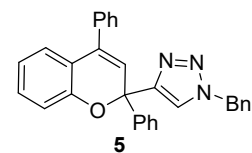

**<sup>13</sup>C NMR, CDCl<sub>3</sub>, 100 MHz**
